# Supplementary material for: Winter diet and food selection of the Black-necked Crane Grus nigricollis in Dashanbao, Yunnan, China
Source: PeerJ. 2016 Apr 21;4:e1968. doi: 10.7717/peerj.1968 (PMC4846803; doi:10.7717/peerj.1968)
Supplement: Data S1 [file peerj-04-1968-s012.xlsx]

## Sheet: Sheet1
	food type	habitat type	month	biomass(g/0.25m2)
2014-2015	potato	farmland	1	0
2014-2015	potato	farmland	1	0
2014-2015	potato	farmland	1	0.882421
2014-2015	potato	farmland	1	0
2014-2015	potato	farmland	1	0
2014-2015	potato	farmland	1	0.237394
2014-2015	potato	farmland	1	0
2014-2015	potato	farmland	1	0.651451
2014-2015	potato	farmland	1	0
2014-2015	potato	farmland	1	1.89394
2014-2015	potato	farmland	1	0
2014-2015	potato	farmland	1	0
2014-2015	potato	farmland	1	0.715942
2014-2015	potato	farmland	1	0.0897319
2014-2015	potato	farmland	1	2.7475
2014-2015	potato	farmland	1	0.331409
2014-2015	potato	farmland	1	4.42894
2014-2015	potato	farmland	1	0
2014-2015	potato	farmland	1	5.34546
2014-2015	potato	farmland	1	0.305599
2014-2015	potato	farmland	1	0
2014-2015	potato	farmland	1	0
2014-2015	potato	farmland	1	1.04808
2014-2015	potato	farmland	1	0
2014-2015	potato	farmland	1	1.13902
2014-2015	potato	farmland	1	0
2014-2015	potato	farmland	1	1.38115
2014-2015	potato	farmland	1	2.70754
2014-2015	potato	farmland	1	2.54193
2014-2015	potato	farmland	1	0
2014-2015	potato	farmland	1	0
2014-2015	potato	farmland	1	0
2014-2015	potato	farmland	1	0.0403213
2014-2015	potato	farmland	1	1.35238
2014-2015	potato	farmland	2	0.9078
2014-2015	potato	farmland	2	1.64162
2014-2015	potato	farmland	2	0.03695
2014-2015	potato	farmland	2	0.01845
2014-2015	potato	farmland	2	0
2014-2015	potato	farmland	2	0.07285
2014-2015	potato	farmland	2	0.880475
2014-2015	potato	farmland	2	0
2014-2015	potato	farmland	2	0
2014-2015	potato	farmland	2	0
2014-2015	potato	farmland	2	0
2014-2015	potato	farmland	2	0.658775
2014-2015	potato	farmland	2	0.82625
2014-2015	potato	farmland	2	2.38033
2014-2015	potato	farmland	2	0
2014-2015	potato	farmland	2	0.226925
2014-2015	potato	farmland	2	0.971175
2014-2015	potato	farmland	2	2.38278
2014-2015	potato	farmland	2	0
2014-2015	potato	farmland	2	4.66045
2014-2015	potato	farmland	2	0
2014-2015	potato	farmland	2	1.68932
2014-2015	potato	farmland	2	2.5306
2014-2015	potato	farmland	2	3.05785
2014-2015	potato	farmland	2	0
2014-2015	potato	farmland	2	0
2014-2015	potato	farmland	2	0
2014-2015	potato	farmland	2	0.06725
2014-2015	potato	farmland	2	0
2014-2015	potato	farmland	2	1.5547
2014-2015	potato	farmland	11	0
2014-2015	potato	farmland	11	0.2524
2014-2015	potato	farmland	11	0
2014-2015	potato	farmland	11	5.075
2014-2015	potato	farmland	11	1.15945
2014-2015	potato	farmland	11	0
2014-2015	potato	farmland	11	5.94003
2014-2015	potato	farmland	11	0
2014-2015	potato	farmland	11	0
2014-2015	potato	farmland	11	0
2014-2015	potato	farmland	11	0
2014-2015	potato	farmland	11	6.07897
2014-2015	potato	farmland	11	3.06
2014-2015	potato	farmland	11	0.5007
2014-2015	potato	farmland	11	3.53328
2014-2015	potato	farmland	11	0
2014-2015	potato	farmland	11	0
2014-2015	potato	farmland	11	0.703225
2014-2015	potato	farmland	11	0
2014-2015	potato	farmland	11	0.195275
2014-2015	potato	farmland	11	1.20578
2014-2015	potato	farmland	11	0.95445
2014-2015	potato	farmland	11	1.18047
2014-2015	potato	farmland	11	5.67357
2014-2015	potato	farmland	11	0.45145
2014-2015	potato	farmland	11	0
2014-2015	potato	farmland	12	4.7409
2014-2015	potato	farmland	12	0.4047
2014-2015	potato	farmland	12	3.08425
2014-2015	potato	farmland	12	0.315825
2014-2015	potato	farmland	12	1.06902
2014-2015	potato	farmland	12	0.575925
2014-2015	potato	farmland	12	0
2014-2015	potato	farmland	12	0.8241
2014-2015	potato	farmland	12	0.75
2014-2015	potato	farmland	12	1.91582
2014-2015	potato	farmland	12	0.601375
2014-2015	potato	farmland	12	0.249825
2014-2015	potato	farmland	12	2.205
2014-2015	potato	farmland	12	0
2014-2015	potato	farmland	12	1.94063
2014-2015	potato	farmland	12	0.8285
2014-2015	potato	farmland	12	0.95725
2014-2015	potato	farmland	12	1.9313
2014-2015	grain	farmland	1	0.0048
2014-2015	grain	farmland	1	0
2014-2015	grain	farmland	1	0.2548
2014-2015	grain	farmland	1	0.3789
2014-2015	grain	farmland	1	0.8601
2014-2015	grain	farmland	1	2.5728
2014-2015	grain	farmland	1	0
2014-2015	grain	farmland	1	0.2517
2014-2015	grain	farmland	1	0.1223
2014-2015	grain	farmland	1	0.0309
2014-2015	grain	farmland	1	0.0388
2014-2015	grain	farmland	2	0
2014-2015	grain	farmland	2	2.0743
2014-2015	grain	farmland	2	0.0202
2014-2015	grain	farmland	2	0.1826
2014-2015	grain	farmland	2	0.257
2014-2015	grain	farmland	2	0.3157
2014-2015	grain	farmland	2	0.015
2014-2015	grain	farmland	2	0.2664
2014-2015	grain	farmland	2	0.1242
2014-2015	grain	farmland	2	0.1358
2014-2015	grain	farmland	2	0.3241
2014-2015	grain	farmland	2	0.443
2014-2015	grain	farmland	2	0.2414
2014-2015	grain	farmland	2	0.0417
2014-2015	grain	farmland	2	0.3743
2014-2015	grain	farmland	11	0.3123
2014-2015	grain	farmland	11	0.04663
2014-2015	grain	farmland	11	3.3081
2014-2015	grain	farmland	11	1.0539
2014-2015	grain	farmland	11	0.2657
2014-2015	grain	farmland	11	4.5282
2014-2015	grain	farmland	11	0.4877
2014-2015	grain	farmland	11	0.1208
2014-2015	grain	farmland	11	0.6053
2014-2015	grain	farmland	11	0.2837
2014-2015	grain	farmland	11	0.2883
2014-2015	grain	farmland	11	0.2161
2014-2015	grain	farmland	11	1.4758
2014-2015	grain	farmland	11	2.6891
2014-2015	grain	farmland	12	0.1165
2014-2015	grain	farmland	12	0.315
2014-2015	grain	farmland	12	0.4519
2014-2015	grain	farmland	12	1.912
2014-2015	grain	farmland	12	0.059
2014-2015	grain	farmland	12	0.0576
2014-2015	grain	farmland	12	1.8455
2014-2015	grain	farmland	12	0.3656
2014-2015	grain	farmland	12	0.2615
2014-2015	grain	farmland	12	0.4327
2014-2015	grain	farmland	1	0.6405
2014-2015	grain	farmland	1	0.4896
2014-2015	grain	farmland	1	2.4173
2014-2015	grain	farmland	1	0.1047
2014-2015	grain	farmland	1	0.4577
2014-2015	grain	farmland	1	0.3842
2014-2015	grain	farmland	1	0.3423
2014-2015	grain	farmland	1	0.1375
2014-2015	grain	farmland	1	0.3195
2014-2015	grain	farmland	2	0.3878
2014-2015	grain	farmland	2	0.0649
2014-2015	grain	farmland	2	1.749
2014-2015	grain	farmland	2	0.3789
2014-2015	grain	farmland	2	0.6966
2014-2015	grain	farmland	2	1.2896
2014-2015	grain	farmland	2	0.1916
2014-2015	grain	farmland	2	0
2014-2015	grain	farmland	2	0.5433
2014-2015	grain	farmland	2	0.2295
2014-2015	grain	farmland	2	0.1218
2014-2015	grain	farmland	2	0.5059
2014-2015	grain	farmland	2	0.4567
2014-2015	grain	farmland	2	0.4343
2014-2015	grain	farmland	2	1.0657
2014-2015	grain	farmland	11	12.6664
2014-2015	grain	farmland	11	12.4077
2014-2015	grain	farmland	11	4.7208
2014-2015	grain	farmland	11	0.8165
2014-2015	grain	farmland	11	3.1439
2014-2015	grain	farmland	11	0.5265
2014-2015	grain	farmland	11	2.1914
2014-2015	grain	farmland	11	0.6653
2014-2015	grain	farmland	11	3.6118
2014-2015	grain	farmland	12	0.2645
2014-2015	grain	farmland	12	1.0138
2014-2015	grain	farmland	12	0.3628
2014-2015	grain	farmland	12	0.2336
2014-2015	grain	farmland	12	6.7583
2014-2015	grain	farmland	12	2.4229
2014-2015	grain	farmland	12	1.0519
2014-2015	grain	farmland	12	0.4556
2014-2015	grain	farmland	12	0.4439
2014-2015	invertebrate	grassland	1	0.1307
2014-2015	invertebrate	grassland	1	0.0662
2014-2015	invertebrate	grassland	1	0.2338
2014-2015	invertebrate	grassland	1	0.7631
2014-2015	invertebrate	grassland	1	0.0633
2014-2015	invertebrate	grassland	1	0.3773
2014-2015	invertebrate	grassland	1	0.2638
2014-2015	invertebrate	grassland	1	1.01
2014-2015	invertebrate	grassland	1	0
2014-2015	invertebrate	grassland	1	0.2549
2014-2015	invertebrate	grassland	1	0.0562
2014-2015	invertebrate	grassland	1	1.3074
2014-2015	invertebrate	grassland	1	0.6529
2014-2015	invertebrate	grassland	1	0
2014-2015	invertebrate	grassland	1	1.6963
2014-2015	invertebrate	grassland	1	0.217
2014-2015	invertebrate	grassland	1	0.552
2014-2015	invertebrate	grassland	1	0.2601
2014-2015	invertebrate	grassland	1	0.138
2014-2015	invertebrate	grassland	1	0.983
2014-2015	invertebrate	grassland	1	0.3
2014-2015	invertebrate	grassland	1	0.2488
2014-2015	invertebrate	grassland	1	0.1658
2014-2015	invertebrate	grassland	1	1.4673
2014-2015	invertebrate	grassland	1	0.0652
2014-2015	invertebrate	grassland	1	0.0891
2014-2015	invertebrate	grassland	1	0
2014-2015	invertebrate	grassland	1	0.8831
2014-2015	invertebrate	grassland	1	0.5788
2014-2015	invertebrate	grassland	1	0.087
2014-2015	invertebrate	grassland	1	0.1128
2014-2015	invertebrate	grassland	1	0
2014-2015	invertebrate	grassland	1	0.0445
2014-2015	invertebrate	grassland	1	0.1399
2014-2015	invertebrate	grassland	1	0.2866
2014-2015	invertebrate	grassland	1	0
2014-2015	invertebrate	grassland	1	0
2014-2015	invertebrate	grassland	1	0.1291
2014-2015	invertebrate	grassland	1	5
2014-2015	invertebrate	grassland	1	0.09
2014-2015	invertebrate	grassland	1	1.4901
2014-2015	invertebrate	grassland	2	2.0413
2014-2015	invertebrate	grassland	2	1.4151
2014-2015	invertebrate	grassland	2	0.7765
2014-2015	invertebrate	grassland	2	2.0307
2014-2015	invertebrate	grassland	2	1.7008
2014-2015	invertebrate	grassland	2	0.5903
2014-2015	invertebrate	grassland	2	0.2403
2014-2015	invertebrate	grassland	2	0.9496
2014-2015	invertebrate	grassland	2	0.7722
2014-2015	invertebrate	grassland	2	1.0576
2014-2015	invertebrate	grassland	2	0.7433
2014-2015	invertebrate	grassland	2	0.0523
2014-2015	invertebrate	grassland	2	0.5765
2014-2015	invertebrate	grassland	2	0
2014-2015	invertebrate	grassland	2	0
2014-2015	invertebrate	grassland	2	0.9151
2014-2015	invertebrate	grassland	2	0.4417
2014-2015	invertebrate	grassland	2	0.4748
2014-2015	invertebrate	grassland	2	0
2014-2015	invertebrate	grassland	2	0
2014-2015	invertebrate	grassland	2	0
2014-2015	invertebrate	grassland	2	0.1103
2014-2015	invertebrate	grassland	2	0.831
2014-2015	invertebrate	grassland	2	0.99
2014-2015	invertebrate	grassland	2	0.5757
2014-2015	invertebrate	grassland	2	0.1448
2014-2015	invertebrate	grassland	2	0.1215
2014-2015	invertebrate	grassland	2	0.7214
2014-2015	invertebrate	grassland	2	0.0464
2014-2015	invertebrate	grassland	2	0.2931
2014-2015	invertebrate	grassland	2	0.1237
2014-2015	invertebrate	grassland	11	0.322
2014-2015	invertebrate	grassland	11	1.8998
2014-2015	invertebrate	grassland	11	3.1526
2014-2015	invertebrate	grassland	11	2.7774
2014-2015	invertebrate	grassland	11	0.4603
2014-2015	invertebrate	grassland	11	0.2744
2014-2015	invertebrate	grassland	11	0
2014-2015	invertebrate	grassland	11	0.1437
2014-2015	invertebrate	grassland	11	0.4492
2014-2015	invertebrate	grassland	11	0.7125
2014-2015	invertebrate	grassland	11	0.1791
2014-2015	invertebrate	grassland	11	0.8
2014-2015	invertebrate	grassland	11	2.1
2014-2015	invertebrate	grassland	11	0.1582
2014-2015	invertebrate	grassland	11	0.021
2014-2015	invertebrate	grassland	11	0.3635
2014-2015	invertebrate	grassland	11	0.2574
2014-2015	invertebrate	grassland	11	0
2014-2015	invertebrate	grassland	11	0
2014-2015	invertebrate	grassland	11	0.4355
2014-2015	invertebrate	grassland	11	0.5541
2014-2015	invertebrate	grassland	11	0.37448
2014-2015	invertebrate	grassland	11	0.4004
2014-2015	invertebrate	grassland	11	1.5998
2014-2015	invertebrate	grassland	11	0.6146
2014-2015	invertebrate	grassland	11	0.3053
2014-2015	invertebrate	grassland	11	0
2014-2015	invertebrate	grassland	11	0.0343
2014-2015	invertebrate	grassland	11	0.2238
2014-2015	invertebrate	grassland	11	1.4939
2014-2015	invertebrate	grassland	11	0
2014-2015	invertebrate	grassland	11	1.1
2014-2015	invertebrate	grassland	11	0.1836
2014-2015	invertebrate	grassland	11	0.1033
2014-2015	invertebrate	grassland	11	0.0761
2014-2015	invertebrate	grassland	12	0.3075
2014-2015	invertebrate	grassland	12	0.1858
2014-2015	invertebrate	grassland	12	0.709
2014-2015	invertebrate	grassland	12	0.7524
2014-2015	invertebrate	grassland	12	0.4946
2014-2015	invertebrate	grassland	12	0
2014-2015	invertebrate	grassland	12	0.2145
2014-2015	invertebrate	grassland	12	0.0753
2014-2015	invertebrate	grassland	12	0
2014-2015	invertebrate	grassland	12	0.1169
2014-2015	invertebrate	grassland	12	0.055
2014-2015	invertebrate	grassland	12	0.7702
2014-2015	invertebrate	grassland	12	0
2014-2015	invertebrate	grassland	12	1.377
2014-2015	invertebrate	grassland	12	0
2014-2015	invertebrate	grassland	12	0
2014-2015	invertebrate	grassland	12	0.1232
2014-2015	invertebrate	grassland	12	0.0687
2014-2015	invertebrate	grassland	12	1.3176
2014-2015	invertebrate	grassland	12	0.0936
2014-2015	invertebrate	grassland	12	0.6068
2014-2015	invertebrate	grassland	12	0.267
2014-2015	invertebrate	grassland	12	0.1215
2014-2015	invertebrate	grassland	12	0.1473
2014-2015	invertebrate	grassland	12	0.6876
2014-2015	invertebrate	grassland	12	0
2014-2015	invertebrate	grassland	12	0.2106
2014-2015	invertebrate	grassland	12	0.7253
2014-2015	invertebrate	grassland	12	0
2014-2015	invertebrate	grassland	12	0
2014-2015	invertebrate	grassland	12	0.079
2014-2015	invertebrate	grassland	12	1.346
2014-2015	invertebrate	grassland	12	0.1104
2014-2015	invertebrate	grassland	12	0
2014-2015	invertebrate	grassland	12	0.0635
2014-2015	invertebrate	grassland	12	0.1614
2014-2015	invertebrate	grassland	12	0
2014-2015	invertebrate	grassland	12	0.0792
2014-2015	invertebrate	grassland	12	0
2014-2015	invertebrate	grassland	12	0
2014-2015	invertebrate	grassland	12	0.6805
2014-2015	herbaceous plants	grassland	1	0.8539
2014-2015	herbaceous plants	grassland	1	2.003
2014-2015	herbaceous plants	grassland	1	11.6224
2014-2015	herbaceous plants	grassland	1	15.2331
2014-2015	herbaceous plants	grassland	1	8.0438
2014-2015	herbaceous plants	grassland	1	2.1596
2014-2015	herbaceous plants	grassland	1	1.4942
2014-2015	herbaceous plants	grassland	1	1.3118
2014-2015	herbaceous plants	grassland	1	0.8397
2014-2015	herbaceous plants	grassland	1	0.5888
2014-2015	herbaceous plants	grassland	1	0.7424
2014-2015	herbaceous plants	grassland	1	0.539
2014-2015	herbaceous plants	grassland	1	0.6262
2014-2015	herbaceous plants	grassland	1	0.4459
2014-2015	herbaceous plants	grassland	1	0.4467
2014-2015	herbaceous plants	grassland	2	1.8148
2014-2015	herbaceous plants	grassland	2	1.5855
2014-2015	herbaceous plants	grassland	2	3.8535
2014-2015	herbaceous plants	grassland	2	0.7058
2014-2015	herbaceous plants	grassland	2	2.7748
2014-2015	herbaceous plants	grassland	2	3.9577
2014-2015	herbaceous plants	grassland	2	0.5594
2014-2015	herbaceous plants	grassland	2	1.8386
2014-2015	herbaceous plants	grassland	2	1.3522
2014-2015	herbaceous plants	grassland	2	3.1512
2014-2015	herbaceous plants	grassland	2	1.0223
2014-2015	herbaceous plants	grassland	2	2.0365
2014-2015	herbaceous plants	grassland	2	1.0004
2014-2015	herbaceous plants	grassland	2	0.4341
2014-2015	herbaceous plants	grassland	2	3.725
2014-2015	herbaceous plants	grassland	2	0.6715
2014-2015	herbaceous plants	grassland	2	0.4956
2014-2015	herbaceous plants	grassland	2	0.4767
2014-2015	herbaceous plants	grassland	2	0.9511
2014-2015	herbaceous plants	grassland	2	3.7185
2014-2015	herbaceous plants	grassland	2	1.7898
2014-2015	herbaceous plants	grassland	2	1.1934
2014-2015	herbaceous plants	grassland	2	1.2584
2014-2015	herbaceous plants	grassland	11	4.5672
2014-2015	herbaceous plants	grassland	11	2.383
2014-2015	herbaceous plants	grassland	11	1.0089
2014-2015	herbaceous plants	grassland	11	3.9566
2014-2015	herbaceous plants	grassland	11	0.5738
2014-2015	herbaceous plants	grassland	11	0.7022
2014-2015	herbaceous plants	grassland	11	0.7931
2014-2015	herbaceous plants	grassland	11	0.54
2014-2015	herbaceous plants	grassland	11	1.1212
2014-2015	herbaceous plants	grassland	11	2.5503
2014-2015	herbaceous plants	grassland	11	0.5103
2014-2015	herbaceous plants	grassland	11	1.2621
2014-2015	herbaceous plants	grassland	11	0.6351
2014-2015	herbaceous plants	grassland	11	0.6793
2014-2015	herbaceous plants	grassland	11	1.0246
2014-2015	herbaceous plants	grassland	11	0.6335
2014-2015	herbaceous plants	grassland	12	1.363
2014-2015	herbaceous plants	grassland	12	5.9782
2014-2015	herbaceous plants	grassland	12	2.6456
2014-2015	herbaceous plants	grassland	12	1.1592
2014-2015	herbaceous plants	grassland	12	1.1918
2014-2015	herbaceous plants	grassland	12	1.2307
2014-2015	herbaceous plants	grassland	12	1.0055
2014-2015	herbaceous plants	grassland	12	0.563
2014-2015	herbaceous plants	grassland	12	1.0169
2014-2015	herbaceous plants	grassland	12	1.1467
2014-2015	herbaceous plants	grassland	11	0.00302563
2014-2015	herbaceous plants	grassland	11	1.59551
2014-2015	herbaceous plants	grassland	11	0.608151
2014-2015	herbaceous plants	grassland	11	11.2231
2014-2015	herbaceous plants	grassland	11	0.024205
2014-2015	herbaceous plants	grassland	11	0.0423588
2014-2015	herbaceous plants	grassland	11	0.0453844
2014-2015	herbaceous plants	grassland	11	14.33
2014-2015	herbaceous plants	grassland	11	0.178512
2014-2015	herbaceous plants	grassland	11	0.432665
2014-2015	herbaceous plants	grassland	11	7.60138
2014-2015	herbaceous plants	grassland	11	1.48558
2014-2015	herbaceous plants	grassland	11	8.84189
2014-2015	herbaceous plants	grassland	11	2.25712
2014-2015	herbaceous plants	grassland	11	2.90158
2014-2015	herbaceous plants	grassland	11	0.181538
2014-2015	herbaceous plants	grassland	11	0.217845
2014-2015	herbaceous plants	grassland	11	0.266255
2014-2015	herbaceous plants	grassland	11	0.302563
2014-2015	herbaceous plants	grassland	11	0.314665
2014-2015	herbaceous plants	grassland	11	15.67
2014-2015	herbaceous plants	grassland	11	0.0151281
2014-2015	herbaceous plants	grassland	11	0.0514357
2014-2015	herbaceous plants	grassland	11	0.0574869
2014-2015	herbaceous plants	grassland	11	0.375178
2014-2015	herbaceous plants	grassland	11	0.024205
2014-2015	herbaceous plants	grassland	11	0.0605125
2014-2015	herbaceous plants	grassland	11	0.105897
2014-2015	herbaceous plants	grassland	11	0.121025
2014-2015	herbaceous plants	grassland	11	3.44619
2014-2015	herbaceous plants	grassland	11	3.67916
2014-2015	herbaceous plants	grassland	11	6.65335
2014-2015	herbaceous plants	grassland	11	10.7712
2014-2015	herbaceous plants	grassland	2	0.0042171
2014-2015	herbaceous plants	grassland	2	0.0168684
2014-2015	herbaceous plants	grassland	2	2.8367
2014-2015	herbaceous plants	grassland	2	0.0337368
2014-2015	herbaceous plants	grassland	2	0.0463881
2014-2015	herbaceous plants	grassland	2	0.0632565
2014-2015	herbaceous plants	grassland	2	0.0674736
2014-2015	herbaceous plants	grassland	2	0.0801249
2014-2015	herbaceous plants	grassland	2	0.0885591
2014-2015	herbaceous plants	grassland	2	0.126513
2014-2015	herbaceous plants	grassland	2	0.134947
2014-2015	herbaceous plants	grassland	2	0.16025
2014-2015	herbaceous plants	grassland	2	0.168684
2014-2015	herbaceous plants	grassland	2	1.61234
2014-2015	herbaceous plants	grassland	2	0.227723
2014-2015	herbaceous plants	grassland	2	0.257243
2014-2015	herbaceous plants	grassland	2	7.31526
2014-2015	herbaceous plants	grassland	2	0.366888
2014-2015	herbaceous plants	grassland	2	0.383756
2014-2015	herbaceous plants	grassland	2	7.47551
2014-2015	herbaceous plants	grassland	2	0.472315
2014-2015	herbaceous plants	grassland	2	0.594611
2014-2015	herbaceous plants	grassland	2	0.708473
2014-2015	herbaceous plants	grassland	2	6.39453
2014-2015	herbaceous plants	grassland	2	0.906677
2014-2015	herbaceous plants	grassland	2	1.18079
2014-2015	herbaceous plants	grassland	2	1.23983
2014-2015	herbaceous plants	grassland	2	11.8641
2014-2015	herbaceous plants	grassland	2	2.2941
2014-2015	herbaceous plants	grassland	2	2.36579
2014-2015	herbaceous plants	grassland	2	11.2976
2014-2015	herbaceous plants	grassland	2	2.93089
2014-2015	herbaceous plants	grassland	2	3.20078
2014-2015	herbaceous plants	grassland	2	4.03998
2014-2015	herbaceous plants	grassland	2	4.48278
2014-2015	herbaceous plants	grassland	2	5.91238
2014-2015	herbaceous plants	grassland	2	11.4241
2014-2015	herbaceous plants	grassland	2	9.96
2014-2015	herbaceous plants	grassland	2	10.03
2014-2015	herbaceous plants	grassland	1	0.00203631
2014-2015	herbaceous plants	grassland	1	0.00814525
2014-2015	herbaceous plants	grassland	1	0.0122179
2014-2015	herbaceous plants	grassland	1	11.47
2014-2015	herbaceous plants	grassland	1	13.69
2014-2015	herbaceous plants	grassland	1	0.0183268
2014-2015	herbaceous plants	grassland	1	0.0264721
2014-2015	herbaceous plants	grassland	1	0.0305447
2014-2015	herbaceous plants	grassland	1	0.0386899
2014-2015	herbaceous plants	grassland	1	0.0468352
2014-2015	herbaceous plants	grassland	1	0.0692346
2014-2015	herbaceous plants	grassland	1	0.0834888
2014-2015	herbaceous plants	grassland	1	3.48956
2014-2015	herbaceous plants	grassland	1	0.111997
2014-2015	herbaceous plants	grassland	1	0.128288
2014-2015	herbaceous plants	grassland	1	7.9
2014-2015	herbaceous plants	grassland	1	6.94
2014-2015	herbaceous plants	grassland	1	0.144578
2014-2015	herbaceous plants	grassland	1	1.53877
2014-2015	herbaceous plants	grassland	1	0.185304
2014-2015	herbaceous plants	grassland	1	0.219922
2014-2015	herbaceous plants	grassland	1	4.99575
2014-2015	herbaceous plants	grassland	1	0.32581
2014-2015	herbaceous plants	grassland	1	0.374682
2014-2015	herbaceous plants	grassland	1	1.1573
2014-2015	herbaceous plants	grassland	1	0.667911
2014-2015	herbaceous plants	grassland	1	1.05277
2014-2015	herbaceous plants	grassland	1	4.59324
2014-2015	herbaceous plants	grassland	1	1.38469
2014-2015	herbaceous plants	grassland	1	1.58832
2014-2015	herbaceous plants	grassland	1	4.71067
2014-2015	herbaceous plants	grassland	1	2.26438
2014-2015	herbaceous plants	grassland	1	2.9832
2014-2015	herbaceous plants	grassland	1	3.54929
2014-2015	herbaceous plants	grassland	1	4.08484
2014-2015	herbaceous plants	grassland	1	3.43119
2014-2015	herbaceous plants	grassland	12	3.7914
2014-2015	herbaceous plants	grassland	12	0.00568141
2014-2015	herbaceous plants	grassland	12	0.0170442
2014-2015	herbaceous plants	grassland	12	1.28716
2014-2015	herbaceous plants	grassland	12	0.0265133
2014-2015	herbaceous plants	grassland	12	4.46243
2014-2015	herbaceous plants	grassland	12	0.0624955
2014-2015	herbaceous plants	grassland	12	3.22641
2014-2015	herbaceous plants	grassland	12	0.0814336
2014-2015	herbaceous plants	grassland	12	0.0814336
2014-2015	herbaceous plants	grassland	12	0.750578
2014-2015	herbaceous plants	grassland	12	0.13446
2014-2015	herbaceous plants	grassland	12	0.15908
2014-2015	herbaceous plants	grassland	12	2.7315
2014-2015	herbaceous plants	grassland	12	0.219681
2014-2015	herbaceous plants	grassland	12	0.875569
2014-2015	herbaceous plants	grassland	12	0.473451
2014-2015	herbaceous plants	grassland	12	0.571929
2014-2015	herbaceous plants	grassland	12	0.732902
2014-2015	herbaceous plants	grassland	12	1.02265
2014-2015	herbaceous plants	grassland	12	3.6159
2014-2015	herbaceous plants	grassland	12	1.1609
2014-2015	herbaceous plants	grassland	12	2.89184
2014-2015	herbaceous plants	grassland	12	3.22136
2014-2015	herbaceous plants	grassland	12	4.57732
2014-2015	herbaceous plants	grassland	12	1.87297
2014-2015	herbaceous plants	grassland	12	10.2
2014-2015	herbaceous plants	grassland	12	9.33
2014-2015	herbaceous plants	grassland	12	8.99
2014-2015	herbaceous plants	grassland	12	11.48
2014-2015	tubers	grassland	1	0.159159
2014-2015	tubers	grassland	1	0.580662
2014-2015	tubers	grassland	1	4.10917
2014-2015	tubers	grassland	1	5.43361
2014-2015	tubers	grassland	1	2.7965
2014-2015	tubers	grassland	1	0.638105
2014-2015	tubers	grassland	1	0.394029
2014-2015	tubers	grassland	1	0.327122
2014-2015	tubers	grassland	1	2.43533
2014-2015	tubers	grassland	1	0.936249
2014-2015	tubers	grassland	1	0.0278777
2014-2015	tubers	grassland	1	0.0234759
2014-2015	tubers	grassland	1	0.342748
2014-2015	tubers	grassland	1	1.62325
2014-2015	tubers	grassland	1	0.388563
2014-2015	tubers	grassland	1	0.65949
2014-2015	tubers	grassland	1	0.153951
2014-2015	tubers	grassland	1	0.0619177
2014-2015	tubers	grassland	1	0.11826
2014-2015	tubers	grassland	1	0.0436505
2014-2015	tubers	grassland	1	0.0756365
2014-2015	tubers	grassland	1	0.00950041
2014-2015	tubers	grassland	1	0.00979386
2014-2015	tubers	grassland	1	20.4
2014-2015	tubers	grassland	1	22.1
2014-2015	tubers	grassland	1	9.6
2014-2015	tubers	grassland	1	29.3
2014-2015	tubers	grassland	1	18.6
2014-2015	tubers	grassland	2	2.29941
2014-2015	tubers	grassland	2	1.9214
2014-2015	tubers	grassland	2	5.66033
2014-2015	tubers	grassland	2	0.474621
2014-2015	tubers	grassland	2	7.81467
2014-2015	tubers	grassland	2	0.868297
2014-2015	tubers	grassland	2	1.02738
2014-2015	tubers	grassland	2	0.87687
2014-2015	tubers	grassland	2	3.69492
2014-2015	tubers	grassland	2	0.471159
2014-2015	tubers	grassland	2	3.88203
2014-2015	tubers	grassland	2	5.83211
2014-2015	tubers	grassland	2	0.229809
2014-2015	tubers	grassland	2	2.33865
2014-2015	tubers	grassland	2	1.53679
2014-2015	tubers	grassland	2	4.50255
2014-2015	tubers	grassland	2	0.992928
2014-2015	tubers	grassland	2	2.6649
2014-2015	tubers	grassland	2	0.956825
2014-2015	tubers	grassland	2	0.0232447
2014-2015	tubers	grassland	2	5.44849
2014-2015	tubers	grassland	2	0.414613
2014-2015	tubers	grassland	2	3.06187
2014-2015	tubers	grassland	2	4.86243
2014-2015	tubers	grassland	2	2.38036
2014-2015	tubers	grassland	2	1.83188
2014-2015	tubers	grassland	2	0.375213
2014-2015	tubers	grassland	2	0.640796
2014-2015	tubers	grassland	2	1.23807
2014-2015	tubers	grassland	2	1.30022
2014-2015	tubers	grassland	2	0.129082
2014-2015	tubers	grassland	2	0.415602
2014-2015	tubers	grassland	2	1.05739
2014-2015	tubers	grassland	2	0.288663
2014-2015	tubers	grassland	2	0.124631
2014-2015	tubers	grassland	2	0.0934734
2014-2015	tubers	grassland	2	0.875551
2014-2015	tubers	grassland	2	5.43778
2014-2015	tubers	grassland	2	2.2582
2014-2015	tubers	grassland	2	1.275
2014-2015	tubers	grassland	2	1.38215
2014-2015	tubers	grassland	2	16.2
2014-2015	tubers	grassland	2	6.72
2014-2015	tubers	grassland	2	14.3
2014-2015	tubers	grassland	2	23.2
2014-2015	tubers	grassland	2	17.5
2014-2015	tubers	grassland	2	20.1
2014-2015	tubers	grassland	11	5.97354
2014-2015	tubers	grassland	11	6.94406
2014-2015	tubers	grassland	11	0.637511
2014-2015	tubers	grassland	11	9.53962
2014-2015	tubers	grassland	11	0.268486
2014-2015	tubers	grassland	11	2.82746
2014-2015	tubers	grassland	11	0.848239
2014-2015	tubers	grassland	11	5.09404
2014-2015	tubers	grassland	11	0.22153
2014-2015	tubers	grassland	11	2.89862
2014-2015	tubers	grassland	11	0.487712
2014-2015	tubers	grassland	11	0.328838
2014-2015	tubers	grassland	11	4.57695
2014-2015	tubers	grassland	11	0.406475
2014-2015	tubers	grassland	11	0.537405
2014-2015	tubers	grassland	11	0.172845
2014-2015	tubers	grassland	11	0.576151
2014-2015	tubers	grassland	11	4.34778
2014-2015	tubers	grassland	11	0.86005
2014-2015	tubers	grassland	11	1.19047
2014-2015	tubers	grassland	11	2.59023
2014-2015	tubers	grassland	11	1.00999
2014-2015	tubers	grassland	11	0.395672
2014-2015	tubers	grassland	11	0.166796
2014-2015	tubers	grassland	11	0.715436
2014-2015	tubers	grassland	11	1.39141
2014-2015	tubers	grassland	11	0.974272
2014-2015	tubers	grassland	11	1.05032
2014-2015	tubers	grassland	11	0.463802
2014-2015	tubers	grassland	11	3.06844
2014-2015	tubers	grassland	11	0.130066
2014-2015	tubers	grassland	11	1.21294
2014-2015	tubers	grassland	11	0.309825
2014-2015	tubers	grassland	11	0.37349
2014-2015	tubers	grassland	11	0
2014-2015	tubers	grassland	11	0.37493
2014-2015	tubers	grassland	11	9.02109
2014-2015	tubers	grassland	11	0.913056
2014-2015	tubers	grassland	11	0.161034
2014-2015	tubers	grassland	11	0.870853
2014-2015	tubers	grassland	11	0.307521
2014-2015	tubers	grassland	12	2.31518
2014-2015	tubers	grassland	12	13.6461
2014-2015	tubers	grassland	12	5.46413
2014-2015	tubers	grassland	12	5.2304
2014-2015	tubers	grassland	12	24.4565
2014-2015	tubers	grassland	12	1.67415
2014-2015	tubers	grassland	12	20.1743
2014-2015	tubers	grassland	12	3.17153
2014-2015	tubers	grassland	12	0.435294
2014-2015	tubers	grassland	12	1.91181
2014-2015	tubers	grassland	12	2.43008
2014-2015	tubers	grassland	12	0.636123
2014-2015	tubers	grassland	12	0.697992
2014-2015	tubers	grassland	12	1.81483
2014-2015	tubers	grassland	12	1.89487
2014-2015	tubers	grassland	12	1.99037
2014-2015	tubers	grassland	12	1.43748
2014-2015	tubers	grassland	12	0.351083
2014-2015	tubers	grassland	12	15.6318
2014-2015	tubers	grassland	12	1.59092
2014-2015	tubers	grassland	12	6.73687
2014-2015	tubers	grassland	12	0.583338
2014-2015	tubers	grassland	12	2.85359
2014-2015	tubers	grassland	12	0.271537
2014-2015	tubers	grassland	12	1.18067
2014-2015	tubers	grassland	12	2.85875
2014-2015	tubers	grassland	12	1.19737
2014-2015	tubers	grassland	12	1.46546
2014-2015	tubers	grassland	12	1.78414
2014-2015	turnips	farmland	1	4.9396
2014-2015	turnips	farmland	1	4.0737
2014-2015	turnips	farmland	1	8.3139
2014-2015	turnips	farmland	2	0.2539
2014-2015	turnips	farmland	2	2.2655
2014-2015	turnips	farmland	2	6.0958
2014-2015	turnips	farmland	2	6.7086
2014-2015	turnips	farmland	2	9.0981
2014-2015	turnips	farmland	2	0.7028
2014-2015	turnips	farmland	2	4.0292
2014-2015	turnips	farmland	2	1.3826
2014-2015	turnips	farmland	2	6.8053
2014-2015	turnips	farmland	2	0.5174
2014-2015	turnips	farmland	2	2.6926
2014-2015	turnips	farmland	2	0.045
2014-2015	turnips	farmland	11	1.3634
2014-2015	turnips	farmland	11	0.6014
2014-2015	turnips	farmland	11	10.8874
2014-2015	turnips	farmland	11	2.8197
2014-2015	turnips	farmland	11	3.0099
2014-2015	turnips	farmland	11	11.8098
2014-2015	turnips	farmland	11	0.4813
2014-2015	turnips	farmland	11	2.6947
2014-2015	turnips	farmland	12	1.0585
2014-2015	turnips	farmland	12	10.149
2014-2015	turnips	farmland	12	1.2387
2014-2015	turnips	farmland	12	1.0687
2014-2015	turnips	farmland	12	2.7047
2014-2015	turnips	farmland	12	2.8053
2014-2015	turnips	farmland	12	1.2124
2014-2015	turnips	farmland	12	25.6922
2013-2014	potato	farmland	1	0
2013-2014	potato	farmland	1	2.128
2013-2014	potato	farmland	1	0
2013-2014	potato	farmland	1	0
2013-2014	potato	farmland	1	0
2013-2014	potato	farmland	1	2.989
2013-2014	potato	farmland	1	1.512
2013-2014	potato	farmland	1	0.637
2013-2014	potato	farmland	1	0.721
2013-2014	potato	farmland	1	0.434
2013-2014	potato	farmland	1	0
2013-2014	potato	farmland	1	0.455
2013-2014	potato	farmland	1	0.105
2013-2014	potato	farmland	1	0
2013-2014	potato	farmland	1	1.561
2013-2014	potato	farmland	1	0
2013-2014	potato	farmland	1	0.56
2013-2014	potato	farmland	1	0
2013-2014	potato	farmland	2	0.154
2013-2014	potato	farmland	2	0
2013-2014	potato	farmland	2	0
2013-2014	potato	farmland	2	2.3605
2013-2014	potato	farmland	2	0.189
2013-2014	potato	farmland	2	0.728
2013-2014	potato	farmland	2	0
2013-2014	potato	farmland	2	0
2013-2014	potato	farmland	2	4.151
2013-2014	potato	farmland	2	0.133
2013-2014	potato	farmland	2	0
2013-2014	potato	farmland	2	0.714
2013-2014	potato	farmland	2	1.918
2013-2014	potato	farmland	2	0
2013-2014	potato	farmland	2	1.253
2013-2014	potato	farmland	11	1.302
2013-2014	potato	farmland	11	0.791
2013-2014	potato	farmland	11	0.231
2013-2014	potato	farmland	11	0.693
2013-2014	potato	farmland	11	5.992
2013-2014	potato	farmland	11	2.835
2013-2014	potato	farmland	11	0
2013-2014	potato	farmland	11	3.836
2013-2014	potato	farmland	11	3.507
2013-2014	potato	farmland	11	0.658
2013-2014	potato	farmland	11	1.351
2013-2014	potato	farmland	11	4.704
2013-2014	potato	farmland	12	1.89
2013-2014	potato	farmland	12	0.994
2013-2014	potato	farmland	12	0.357
2013-2014	potato	farmland	12	2.31
2013-2014	potato	farmland	12	0.112
2013-2014	potato	farmland	12	6.776
2013-2014	potato	farmland	12	0
2013-2014	potato	farmland	12	0.679
2013-2014	potato	farmland	12	0.273
2013-2014	potato	farmland	12	0
2013-2014	potato	farmland	12	0.245
2013-2014	potato	farmland	12	3.157
2013-2014	potato	farmland	12	0.217
2013-2014	potato	farmland	12	0
2013-2014	grains	farmland	1	0.4
2013-2014	grains	farmland	1	0.763
2013-2014	grains	farmland	1	0.797
2013-2014	grains	farmland	1	0.179
2013-2014	grains	farmland	1	0
2013-2014	grains	farmland	1	0.144
2013-2014	grains	farmland	1	0.459
2013-2014	grains	farmland	1	0.288
2013-2014	grains	farmland	1	0.161
2013-2014	grains	farmland	1	0.029
2013-2014	grains	farmland	1	0.63
2013-2014	grains	farmland	1	0.275
2013-2014	grains	farmland	2	0.022
2013-2014	grains	farmland	2	0.02
2013-2014	grains	farmland	2	0
2013-2014	grains	farmland	2	0.41
2013-2014	grains	farmland	2	0.162
2013-2014	grains	farmland	2	0.094
2013-2014	grains	farmland	2	0.047
2013-2014	grains	farmland	2	0.09
2013-2014	grains	farmland	2	0.144
2013-2014	grains	farmland	2	0.049
2013-2014	grains	farmland	2	0.13
2013-2014	grains	farmland	2	0.023
2013-2014	grains	farmland	11	1
2013-2014	grains	farmland	11	0.154
2013-2014	grains	farmland	11	0.1
2013-2014	grains	farmland	11	1.363
2013-2014	grains	farmland	11	0.567
2013-2014	grains	farmland	11	0.526
2013-2014	grains	farmland	11	0.268
2013-2014	grains	farmland	11	1.238
2013-2014	grains	farmland	11	0.021
2013-2014	grains	farmland	11	1.251
2013-2014	grains	farmland	11	0.281
2013-2014	grains	farmland	11	0.542
2013-2014	grains	farmland	12	0.448
2013-2014	grains	farmland	12	0.604
2013-2014	grains	farmland	12	0.151
2013-2014	grains	farmland	12	0.121
2013-2014	grains	farmland	12	0.192
2013-2014	grains	farmland	12	0.11
2013-2014	grains	farmland	12	0.039
2013-2014	grains	farmland	12	0.201
2013-2014	grains	farmland	12	0.312
2013-2014	grains	farmland	12	2.778
2013-2014	grains	farmland	12	0.435
2013-2014	grains	farmland	1	0.664
2013-2014	grains	farmland	1	0.81
2013-2014	grains	farmland	1	0.827
2013-2014	grains	farmland	1	0.176
2013-2014	grains	farmland	1	0.188
2013-2014	grains	farmland	1	0.169
2013-2014	grains	farmland	1	0.029
2013-2014	grains	farmland	1	0.02
2013-2014	grains	farmland	2	0.432
2013-2014	grains	farmland	2	0.598
2013-2014	grains	farmland	2	0.063
2013-2014	grains	farmland	2	0.218
2013-2014	grains	farmland	2	0.124
2013-2014	grains	farmland	2	0.18
2013-2014	grains	farmland	2	0.52
2013-2014	grains	farmland	2	0.342
2013-2014	grains	farmland	11	0.228
2013-2014	grains	farmland	11	0.136
2013-2014	grains	farmland	11	0.138
2013-2014	grains	farmland	11	5.133
2013-2014	grains	farmland	11	2.066
2013-2014	grains	farmland	11	1.521
2013-2014	grains	farmland	11	0
2013-2014	grains	farmland	11	0
2013-2014	grains	farmland	11	0
2013-2014	grains	farmland	12	2.442
2013-2014	grains	farmland	12	2.31
2013-2014	grains	farmland	12	2.141
2013-2014	grains	farmland	12	0.811
2013-2014	grains	farmland	12	0.344
2013-2014	grains	farmland	12	0.348
2013-2014	grains	farmland	12	1.679
2013-2014	grains	farmland	12	0.682
2013-2014	grains	farmland	12	0.655
2013-2014	grains	farmland	12	0
2013-2014	grains	farmland	12	0
2013-2014	grains	farmland	12	0
2013-2014	invertebrate	farmland	11	1.238
2013-2014	invertebrate	farmland	11	0.83
2013-2014	invertebrate	farmland	11	1.759
2013-2014	invertebrate	farmland	11	1.811
2013-2014	invertebrate	farmland	12	0.369
2013-2014	invertebrate	farmland	12	0.868
2013-2014	invertebrate	farmland	12	1.077
2013-2014	invertebrate	farmland	12	0.041
2013-2014	invertebrate	farmland	12	0.255
2013-2014	invertebrate	farmland	12	0.282
2013-2014	invertebrate	farmland	1	0.471
2013-2014	invertebrate	farmland	1	0.397
2013-2014	invertebrate	farmland	1	0.065
2013-2014	invertebrate	farmland	1	0.055
2013-2014	invertebrate	farmland	1	0
2013-2014	invertebrate	farmland	1	0.144
2013-2014	invertebrate	farmland	2	0.226
2013-2014	invertebrate	farmland	2	0.185
2013-2014	invertebrate	farmland	2	1.921
2013-2014	invertebrate	farmland	2	0.652
2013-2014	invertebrate	farmland	2	0.487
2013-2014	invertebrate	farmland	2	0.32
2013-2014	invertebrate	farmland	11	0.058
2013-2014	invertebrate	farmland	11	0.033
2013-2014	invertebrate	farmland	11	0.1
2013-2014	invertebrate	farmland	12	0.017
2013-2014	invertebrate	farmland	12	0
2013-2014	invertebrate	farmland	12	0.032
2013-2014	invertebrate	farmland	1	0.041
2013-2014	invertebrate	farmland	1	0
2013-2014	invertebrate	farmland	1	0.032
2013-2014	invertebrate	farmland	2	0.135
2013-2014	invertebrate	farmland	2	0
2013-2014	invertebrate	farmland	2	0.193
2013-2014	invertebrate	farmland	11	1.64
2013-2014	invertebrate	farmland	11	1.4
2013-2014	invertebrate	farmland	11	1.43
2013-2014	invertebrate	farmland	12	0.671
2013-2014	invertebrate	farmland	12	0.529
2013-2014	invertebrate	farmland	12	0.529
2013-2014	invertebrate	farmland	1	0.262
2013-2014	invertebrate	farmland	1	0.697
2013-2014	invertebrate	farmland	1	0.203
2013-2014	invertebrate	farmland	2	1.243
2013-2014	invertebrate	farmland	2	0.754
2013-2014	invertebrate	farmland	2	0.786
2013-2014	invertebrate	farmland	2	3.586
2013-2014	tubers	farmland	1	3.616
2013-2014	tubers	farmland	1	0.024
2013-2014	tubers	farmland	1	7.936
2013-2014	tubers	farmland	1	4.083
2013-2014	tubers	farmland	1	6.583
2013-2014	tubers	farmland	1	38.59
2013-2014	tubers	farmland	1	12.791
2013-2014	tubers	farmland	1	3.382
2013-2014	tubers	farmland	1	11.596
2013-2014	tubers	farmland	1	2.994
2013-2014	tubers	farmland	1	33.47
2013-2014	tubers	farmland	1	1.238
2013-2014	tubers	farmland	1	0.166
2013-2014	tubers	farmland	1	0.86
2013-2014	tubers	farmland	1	27.94
2013-2014	tubers	farmland	2	3.437
2013-2014	tubers	farmland	2	0.142
2013-2014	tubers	farmland	2	0.186
2013-2014	tubers	farmland	2	4.602
2013-2014	tubers	farmland	2	29.47
2013-2014	tubers	farmland	2	0.306
2013-2014	tubers	farmland	2	1.827
2013-2014	tubers	farmland	2	8.688
2013-2014	tubers	farmland	2	0.256
2013-2014	tubers	farmland	2	4.195
2013-2014	tubers	farmland	2	22.36
2013-2014	tubers	farmland	2	6.49
2013-2014	tubers	farmland	2	0.864
2013-2014	tubers	farmland	2	0.244
2013-2014	tubers	farmland	2	1.399
2013-2014	tubers	farmland	2	0.174
2013-2014	tubers	farmland	2	16.39
2013-2014	tubers	farmland	2	25.13
2013-2014	tubers	farmland	11	5.001
2013-2014	tubers	farmland	11	22.3
2013-2014	tubers	farmland	11	12.47
2013-2014	tubers	farmland	11	1.802
2013-2014	tubers	farmland	11	2.291
2013-2014	tubers	farmland	11	17.2
2013-2014	tubers	farmland	11	14.33
2013-2014	tubers	farmland	11	1.1
2013-2014	tubers	farmland	11	2.428
2013-2014	tubers	farmland	11	0.238
2013-2014	tubers	farmland	11	7.5
2013-2014	tubers	farmland	12	0.508
2013-2014	tubers	farmland	12	1.365
2013-2014	tubers	farmland	12	1.141
2013-2014	tubers	farmland	12	3.425
2013-2014	tubers	farmland	12	28.66
2013-2014	tubers	farmland	12	1.757
2013-2014	tubers	farmland	12	44.7
2013-2014	tubers	farmland	12	9.399
2013-2014	tubers	farmland	12	0.109
2013-2014	tubers	farmland	12	0.291
2013-2014	tubers	farmland	12	0.045
2013-2014	tubers	farmland	12	6.69
2013-2014	tubers	farmland	12	0.621
2013-2014	tubers	farmland	12	1.7
2013-2014	tubers	farmland	12	26.66
2013-2014	tubers	farmland	12	1.492
2013-2014	tubers	farmland	12	2.747
2013-2014	tubers	farmland	12	0.41
2013-2014	tubers	farmland	12	0.305
2013-2014	herbaceous plants	farmland	1	1.222
2013-2014	herbaceous plants	farmland	1	0.583
2013-2014	herbaceous plants	farmland	1	1.24
2013-2014	herbaceous plants	farmland	1	0.269
2013-2014	herbaceous plants	farmland	1	0.779
2013-2014	herbaceous plants	farmland	1	0.551
2013-2014	herbaceous plants	farmland	1	0.142
2013-2014	herbaceous plants	farmland	2	0.502
2013-2014	herbaceous plants	farmland	2	5.725
2013-2014	herbaceous plants	farmland	2	0.054
2013-2014	herbaceous plants	farmland	2	2.756
2013-2014	herbaceous plants	farmland	2	0.473
2013-2014	herbaceous plants	farmland	2	0.53
2013-2014	herbaceous plants	farmland	2	1.729
2013-2014	herbaceous plants	farmland	2	7.819
2013-2014	herbaceous plants	farmland	2	0.441
2013-2014	herbaceous plants	farmland	11	0.858
2013-2014	herbaceous plants	farmland	11	1.583
2013-2014	herbaceous plants	farmland	11	12.2
2013-2014	herbaceous plants	farmland	11	19.36
2013-2014	herbaceous plants	farmland	11	18.44
2013-2014	herbaceous plants	farmland	12	0.367
2013-2014	herbaceous plants	farmland	12	3.456
2013-2014	herbaceous plants	farmland	12	0.472
2013-2014	herbaceous plants	farmland	12	0.107
2013-2014	herbaceous plants	farmland	12	9.736
2013-2014	turnip	farmland	1	8.079
2013-2014	turnip	farmland	1	0.808
2013-2014	turnip	farmland	1	8.043
2013-2014	turnip	farmland	1	11.685
2013-2014	turnip	farmland	2	1.085
2013-2014	turnip	farmland	2	2.162
2013-2014	turnip	farmland	2	14.736
2013-2014	turnip	farmland	11	1.2
2013-2014	turnip	farmland	11	40.3
2013-2014	turnip	farmland	11	15.69
2013-2014	turnip	farmland	11	16.78
2013-2014	turnip	farmland	11	26.03
2013-2014	turnip	farmland	11	0
2013-2014	turnip	farmland	11	0
2013-2014	turnip	farmland	11	0
2013-2014	turnip	farmland	12	2.498
2013-2014	turnip	farmland	12	1.9
2013-2014	turnip	farmland	12	20.867
2013-2014	turnip	farmland	12	80.507
2013-2014	turnip	farmland	12	6.116
2013-2014	turnip	farmland	12	12.03
2013-2014	turnip	farmland	12	1.501
2013-2014	turnip	farmland	12	2.652
2013-2014	herbaceous plants	grassland	1	0.0769199
2013-2014	herbaceous plants	grassland	1	0.0850168
2013-2014	herbaceous plants	grassland	1	6.13875
2013-2014	herbaceous plants	grassland	1	0.87041
2013-2014	herbaceous plants	grassland	1	1.13356
2013-2014	herbaceous plants	grassland	1	1.19023
2013-2014	herbaceous plants	grassland	1	11.3895
2013-2014	herbaceous plants	grassland	1	0.0293229
2013-2014	herbaceous plants	grassland	1	0.0371423
2013-2014	herbaceous plants	grassland	1	0.0449618
2013-2014	herbaceous plants	grassland	1	0.0664653
2013-2014	herbaceous plants	grassland	1	0.0801493
2013-2014	herbaceous plants	grassland	1	1.249
2013-2014	herbaceous plants	grassland	2	0.121453
2013-2014	herbaceous plants	grassland	2	0.129549
2013-2014	herbaceous plants	grassland	2	0.15384
2013-2014	herbaceous plants	grassland	2	0.161937
2013-2014	herbaceous plants	grassland	2	9.69
2013-2014	herbaceous plants	grassland	2	2.20234
2013-2014	herbaceous plants	grassland	2	2.27116
2013-2014	herbaceous plants	grassland	2	10.8457
2013-2014	herbaceous plants	grassland	2	2.81365
2013-2014	herbaceous plants	grassland	2	10.11
2013-2014	herbaceous plants	grassland	2	9.2
2013-2014	herbaceous plants	grassland	2	3.34998
2013-2014	herbaceous plants	grassland	2	0.29046
2013-2014	herbaceous plants	grassland	2	0.302079
2013-2014	herbaceous plants	grassland	2	0.014523
2013-2014	herbaceous plants	grassland	2	9.58
2013-2014	herbaceous plants	grassland	2	1.4
2013-2014	herbaceous plants	grassland	11	0.116184
2013-2014	herbaceous plants	grassland	11	3.30834
2013-2014	herbaceous plants	grassland	11	3.532
2013-2014	herbaceous plants	grassland	11	0.00404842
2013-2014	herbaceous plants	grassland	11	22.6
2013-2014	herbaceous plants	grassland	11	13.4
2013-2014	herbaceous plants	grassland	11	1.54784
2013-2014	herbaceous plants	grassland	11	0.218615
2013-2014	herbaceous plants	grassland	11	0.246953
2013-2014	herbaceous plants	grassland	11	0.352212
2013-2014	herbaceous plants	grassland	11	0.368406
2013-2014	herbaceous plants	grassland	11	18.3
2013-2014	herbaceous plants	grassland	11	19.7
2013-2014	herbaceous plants	grassland	11	3.07275
2013-2014	herbaceous plants	grassland	11	3.87838
2013-2014	herbaceous plants	grassland	11	4.30347
2013-2014	herbaceous plants	grassland	11	5.67588
2013-2014	herbaceous plants	grassland	11	10.7572
2013-2014	herbaceous plants	grassland	11	18.22
2013-2014	herbaceous plants	grassland	11	8
2013-2014	herbaceous plants	grassland	12	0.0323873
2013-2014	herbaceous plants	grassland	12	0.0445326
2013-2014	herbaceous plants	grassland	12	0.0607263
2013-2014	herbaceous plants	grassland	12	0.0647747
2013-2014	herbaceous plants	grassland	12	20
2013-2014	herbaceous plants	grassland	12	7.17649
2013-2014	herbaceous plants	grassland	12	0.453423
2013-2014	herbaceous plants	grassland	12	0.570827
2013-2014	herbaceous plants	grassland	12	0.680134
2013-2014	herbaceous plants	grassland	12	6.19
2013-2014	herbaceous plants	grassland	12	0.00195486
2013-2014	herbaceous plants	grassland	12	0.00781944
2013-2014	herbaceous plants	grassland	12	0.0117292
2013-2014	herbaceous plants	grassland	12	0.0175937
2013-2014	herbaceous plants	grassland	12	0.0254132
2013-2014	herbaceous plants	grassland	12	15.36
2013-2014	herbaceous plants	grassland	12	18.45
