# Supplementary material for: Winter diet and food selection of the Black-necked Crane Grus nigricollis in Dashanbao, Yunnan, China
Source: PeerJ. 2016 Apr 21;4:e1968. doi: 10.7717/peerj.1968 (PMC4846803; doi:10.7717/peerj.1968)
Supplement: Data S2 [file peerj-04-1968-s013.xlsx]

## Sheet: Sheet1
year	foood type	month	habitat type	local	sample	n/m2	depth(cm)
2013-2014	grain	1	farmland	Dahaizi	1	25	2
2013-2014	grain	1	farmland	Dahaizi	2	38	1
2013-2014	grain	1	farmland	Dahaizi	3	35	1
2013-2014	grain	1	farmland	Dahaizi	1	18	2
2013-2014	grain	1	farmland	Dahaizi	2	0	1
2013-2014	grain	1	farmland	Tiaodunhe	3	26	2
2013-2014	grain	1	farmland	Tiaodunhe	1	22	1
2013-2014	grain	1	farmland	Tiaodunhe	2	28	2
2013-2014	grain	1	farmland	Tiaodunhe	3	13	1
2013-2014	grain	1	farmland	Tiaodunhe	1	13	1
2013-2014	grain	1	farmland	Tiaodunhe	2	117	1
2013-2014	grain	1	farmland	Tiaodunhe	3	24	2
2013-2014	grain	1	farmland	Tiaodunhe	1	10	1
2013-2014	grain	1	farmland	Tiaodunhe	2	55	1
2013-2014	grain	1	farmland	Tiaodunhe	3	82	1
2013-2014	grain	2	farmland	Dahaizi	2	1	2
2013-2014	grain	2	farmland	Dahaizi	1	38	1
2013-2014	grain	2	farmland	Dahaizi	2	9	1
2013-2014	grain	2	farmland	Dahaizi	3	9	1
2013-2014	grain	2	farmland	Tiaodunhe	1	10	2
2013-2014	grain	2	farmland	Tiaodunhe	2	8	2.5
2013-2014	grain	2	farmland	Tiaodunhe	1	5	2
2013-2014	grain	2	farmland	Tiaodunhe	2	12	2
2013-2014	grain	2	farmland	Tiaodunhe	3	1	2
2013-2014	grain	11	farmland	Dahaizi	1	28	0.5
2013-2014	grain	11	farmland	Dahaizi	2	13	0.5
2013-2014	grain	11	farmland	Dahaizi	3	14	1
2013-2014	grain	11	farmland	Dahaizi	1	107	0.5
2013-2014	grain	11	farmland	Dahaizi	2	55	0.5
2013-2014	grain	11	farmland	Dahaizi	3	45	0.2
2013-2014	grain	11	farmland	Tiaodunhe	3	1	0.2
2013-2014	grain	11	farmland	Tiaodunhe	1	24	0.5
2013-2014	grain	11	farmland	Tiaodunhe	2	83	0.5
2013-2014	grain	11	farmland	Tiaodunhe	3	2	1
2013-2014	grain	11	farmland	Tiaodunhe	1	79	0.2
2013-2014	grain	11	farmland	Tiaodunhe	2	19	0.5
2013-2014	grain	11	farmland	Tiaodunhe	3	35	1
2013-2014	grain	12	farmland	Dahaizi	1	35	1
2013-2014	grain	12	farmland	Dahaizi	2	25	1
2013-2014	grain	12	farmland	Dahaizi	3	11	1
2013-2014	grain	12	farmland	Dahaizi	1	5	1
2013-2014	grain	12	farmland	Dahaizi	2	0	1
2013-2014	grain	12	farmland	Dahaizi	3	12	1
2013-2014	grain	12	farmland	Dahaizi	1	4	2
2013-2014	grain	12	farmland	Dahaizi	2	7	1
2013-2014	grain	12	farmland	Tiaodunhe	1	3	1
2013-2014	grain	12	farmland	Tiaodunhe	4	13	1
2013-2014	grain	12	farmland	Tiaodunhe	5	19	1
2013-2014	grain	12	farmland	Tiaodunhe	6	112	0.5
2013-2014	grain	12	farmland	Tiaodunhe	1	149	0.2
2013-2014	grain	12	farmland	Tiaodunhe	2	30	1
2013-2014	grain	12	farmland	Tiaodunhe	3	129	0.2
2013-2014	grain	1	farmland	Dahaizi	1	0	1
2013-2014	grain	1	farmland	Dahaizi	2	0	2
2013-2014	grain	1	farmland	Dahaizi	3	2	2
2013-2014	grain	1	farmland	Dahaizi	1	44	1
2013-2014	grain	1	farmland	Dahaizi	2	61	1
2013-2014	grain	1	farmland	Dahaizi	3	50	1
2013-2014	grain	1	farmland	Dahaizi	1	18	1
2013-2014	grain	1	farmland	Dahaizi	3	11	2
2013-2014	grain	1	farmland	Tiaodunhe	1	10	1
2013-2014	grain	1	farmland	Tiaodunhe	2	2	2
2013-2014	grain	1	farmland	Tiaodunhe	3	2	0.5
2013-2014	grain	2	farmland	Dahaizi	1	66	2
2013-2014	grain	2	farmland	Dahaizi	2	26	2
2013-2014	grain	2	farmland	Dahaizi	3	34	1
2013-2014	grain	2	farmland	Tiaodunhe	1	5	1
2013-2014	grain	2	farmland	Tiaodunhe	2	14	2
2013-2014	grain	2	farmland	Tiaodunhe	3	7	1
2013-2014	grain	2	farmland	Tiaodunhe	1	6	2
2013-2014	grain	2	farmland	Tiaodunhe	2	103	0.2
2013-2014	grain	2	farmland	Tiaodunhe	3	16	1
2013-2014	grain	11	farmland	Dahaizi	1	11	0.5
2013-2014	grain	11	farmland	Dahaizi	2	6	1
2013-2014	grain	11	farmland	Dahaizi	3	7	0.5
2013-2014	grain	11	farmland	Tiaodunhe	1	164	0.2
2013-2014	grain	11	farmland	Tiaodunhe	2	95	0.5
2013-2014	grain	11	farmland	Tiaodunhe	3	74	0.1
2013-2014	grain	12	farmland	Dahaizi	1	126	1
2013-2014	grain	12	farmland	Dahaizi	2	124	1
2013-2014	grain	12	farmland	Dahaizi	3	117	0.5
2013-2014	grain	12	farmland	Tiaodunhe	1	62	0.5
2013-2014	grain	12	farmland	Tiaodunhe	2	23	1
2013-2014	grain	12	farmland	Tiaodunhe	3	31	1
2013-2014	potato	12	farmland	Tiaodunhe	1	0	2
2013-2014	potato	12	farmland	Tiaodunhe	2	2	1
2013-2014	potato	12	farmland	Tiaodunhe	3	3	2
2013-2014	grain	12	farmland	Tiaodunhe	4	13	1
2013-2014	grain	12	farmland	Tiaodunhe	5	19	1
2013-2014	grain	12	farmland	Tiaodunhe	6	112	0.5
2013-2014	grain	12	farmland	Dahaizi	1	34	0.5
2013-2014	grain	12	farmland	Dahaizi	2	16	1
2013-2014	grain	12	farmland	Dahaizi	3	15	1
2013-2014	potato	1	farmland	Dahaizi	2	1	2
2013-2014	potato	1	farmland	Dahaizi	3	1	4
2013-2014	potato	1	farmland	Dahaizi	1	1	5
2013-2014	potato	1	farmland	Dahaizi	2	1	4
2013-2014	potato	1	farmland	Dahaizi	3	1	4
2013-2014	potato	1	farmland	Tiaodunhe	1	1	1
2013-2014	potato	1	farmland	Tiaodunhe	3	2	2
2013-2014	potato	1	farmland	Tiaodunhe	4	1	1
2013-2014	potato	1	farmland	Tiaodunhe	6	2	2
2013-2014	potato	1	farmland	Tiaodunhe	2	2	3
2013-2014	potato	2	farmland	Dahaizi	1	1	3
2013-2014	potato	2	farmland	Dahaizi	1	1	5
2013-2014	potato	2	farmland	Dahaizi	2	1	6
2013-2014	potato	2	farmland	Dahaizi	3	1	4
2013-2014	potato	2	farmland	Dahaizi	3	2	4
2013-2014	potato	2	farmland	Dahaizi			6
2013-2014	potato	2	farmland	Tiaodunhe	1	2	1
2013-2014	potato	2	farmland	Tiaodunhe			2
2013-2014	potato	2	farmland	Tiaodunhe	3	1	2
2013-2014	potato	2	farmland	Tiaodunhe	1	4	3
2013-2014	potato	2	farmland	Tiaodunhe			2
2013-2014	potato	2	farmland	Tiaodunhe	3	2	1
2013-2014	potato	2	farmland	Tiaodunhe			3
2013-2014	potato	11	farmland	Dahaizi	1	2	2
2013-2014	potato	11	farmland	Dahaizi			2
2013-2014	potato	11	farmland	Dahaizi	1	3	2
2013-2014	potato	11	farmland	Dahaizi	2	1	1
2013-2014	potato	11	farmland	Dahaizi	3	1	1
2013-2014	potato	11	farmland	Dahaizi	1	4	2
2013-2014	potato	11	farmland	Dahaizi			1
2013-2014	potato	11	farmland	Dahaizi			2
2013-2014	potato	11	farmland	Dahaizi			1
2013-2014	potato	11	farmland	Dahaizi	2	3	3
2013-2014	potato	11	farmland	Dahaizi			3
2013-2014	potato	11	farmland	Dahaizi			2
2013-2014	potato	11	farmland	Dahaizi	3	1	2.5
2013-2014	potato	11	farmland	Tiaodunhe	2	2	1
2013-2014	potato	11	farmland	Tiaodunhe			1
2013-2014	potato	11	farmland	Tiaodunhe	3	1	1
2013-2014	potato	11	farmland	Tiaodunhe	1	2	2
2013-2014	potato	11	farmland	Tiaodunhe	2	3	2
2013-2014	potato	11	farmland	Tiaodunhe	3	2	2
2013-2014	potato	12	farmland	Dahaizi	1	2	3
2013-2014	potato	12	farmland	Dahaizi			4
2013-2014	potato	12	farmland	Dahaizi	2	1	3
2013-2014	potato	12	farmland	Dahaizi	3	1	4
2013-2014	potato	12	farmland	Dahaizi	1	2	3
2013-2014	potato	12	farmland	Dahaizi	2	2	2
2013-2014	potato	12	farmland	Dahaizi			2
2013-2014	potato	12	farmland	Dahaizi	3	5	2
2013-2014	potato	12	farmland	Dahaizi			4
2013-2014	potato	12	farmland	Dahaizi			4
2013-2014	potato	12	farmland	Dahaizi			3
2013-2014	potato	12	farmland	Dahaizi	2	3	3
2013-2014	potato	12	farmland	Dahaizi			3
2013-2014	potato	12	farmland	Dahaizi			2
2013-2014	potato	12	farmland	Tiaodunhe	1	1	1
2013-2014	potato	12	farmland	Tiaodunhe	3	1	2
2013-2014	potato	12	farmland	Tiaodunhe	1	5	2
2013-2014	potato	13	farmland	Tiaodunhe			3
2013-2014	potato	14	farmland	Tiaodunhe			3
2013-2014	potato	12	farmland	Tiaodunhe	2	1	1
2014-2015	grain	11	farmland	Dahaizi	1	622	1
2014-2015	grain	11	farmland	Dahaizi	2	578	1
2014-2015	grain	11	farmland	Dahaizi	3	235	0.1
2014-2015	grain	11	farmland	Dahaizi	4	42	0.6
2014-2015	grain	11	farmland	Tiaodunhe	5	170	1
2014-2015	grain	11	farmland	Tiaodunhe	7	116	2
2014-2015	grain	11	farmland	Tiaodunhe	9	178	2
2014-2015	grain	12	farmland	Dahaizi	1	11	1
2014-2015	grain	12	farmland	Dahaizi	2	50	2
2014-2015	grain	12	farmland	Dahaizi	3	15	2
2014-2015	grain	12	farmland	Dahaizi	4	10	1
2014-2015	grain	12	farmland	Dahaizi	5	316	2
2014-2015	grain	12	farmland	Dahaizi	6	117	1.5
2014-2015	grain	12	farmland	Dahaizi	7	48	1
2014-2015	grain	1	farmland	Dahaizi	1	37	1
2014-2015	grain	1	farmland	Dahaizi	2	24	2
2014-2015	grain	1	farmland	Dahaizi	3	123	1
2014-2015	grain	1	farmland	Dahaizi	4	6	1
2014-2015	grain	1	farmland	Dahaizi	5	23	1
2014-2015	grain	1	farmland	Tiaodunhe	6	22	2
2014-2015	grain	1	farmland	Tiaodunhe	7	19	2
2014-2015	grain	1	farmland	Tiaodunhe	8	10	1
2014-2015	grain	2	farmland	Dahaizi	21	19	3
2014-2015	grain	2	farmland	Dahaizi	11	3	2
2014-2015	grain	2	farmland	Dahaizi	28	95	1
2014-2015	grain	2	farmland	Dahaizi	12	22	1
2014-2015	grain	2	farmland	Dahaizi	10	35	2
2014-2015	grain	2	farmland	Dahaizi	17	67	1
2014-2015	grain	2	farmland	Dahaizi	21	12	2
2014-2015	grain	2	farmland	Tiaodunhe	9	30	1.1
2014-2015	grain	2	farmland	Tiaodunhe	24	11	3
2014-2015	grain	11	farmland	Dahaizi	1	17	1
2014-2015	grain	11	farmland	Dahaizi	2	3	1
2014-2015	grain	11	farmland	Dahaizi	3	167	1.2
2014-2015	grain	11	farmland	Dahaizi	6	247	0.5
2014-2015	grain	11	farmland	Dahaizi	8	8	2
2014-2015	grain	11	farmland	Dahaizi	14	137	1
2014-2015	grain	12	farmland	Dahaizi	1	6	2
2014-2015	grain	12	farmland	Dahaizi	2	20	2
2014-2015	grain	12	farmland	Dahaizi	4	28	1
2014-2015	grain	12	farmland	Dahaizi	5	80	1
2014-2015	grain	12	farmland	Dahaizi	6	1	1
2014-2015	grain	12	farmland	Tiaodunhe	7	1	1
2014-2015	grain	12	farmland	Tiaodunhe	8	80	1
2014-2015	grain	12	farmland	Tiaodunhe	9	21	2
2014-2015	grain	12	farmland	Tiaodunhe	10	20	2
2014-2015	grain	12	farmland	Tiaodunhe	11	30	1
2014-2015	grain	2	farmland	Dahaizi	20	145	1
2014-2015	grain	2	farmland	Dahaizi	12	15	2
2014-2015	grain	2	farmland	Dahaizi	18	19	1
2014-2015	grain	2	farmland	Dahaizi	22	22	1
2014-2015	grain	2	farmland	Dahaizi	23	1	1
2014-2015	grain	2	farmland	Tiaodunhe	41	19	1
2014-2015	grain	2	farmland	Tiaodunhe	26	9	3
2014-2015	grain	2	farmland	Tiaodunhe	11	11	2
2014-2015	grain	2	farmland	Tiaodunhe	17	49	2
2014-2015	grain	2	farmland	Tiaodunhe	23	25	1
2014-2015	grain	2	farmland	Tiaodunhe	45	35	1
2014-2015	potato	11	farmland	Dahaizi	1	5	1.5
2014-2015	potato	11	farmland	Dahaizi	2	1	3
2014-2015	potato	11	farmland	Dahaizi	3	4	2
2014-2015	potato	11	farmland	Dahaizi	8	2	1
2014-2015	potato	12	farmland	Dahaizi	2	2	2
2014-2015	potato	12	farmland	Dahaizi	4	6	2
2014-2015	potato	12	farmland	Dahaizi	5	1	3.2
2014-2015	potato	12	farmland	Dahaizi	7	4	2
2014-2015	potato	12	farmland	Tiaodunhe	18	1	4
2014-2015	potato	1	farmland	Dahaizi	3	2	3
2014-2015	potato	1	farmland	Dahaizi	8	1	3
2014-2015	potato	1	farmland	Dahaizi	13	1	2
2014-2015	potato	1	farmland	Dahaizi	17	1	3
2014-2015	potato	1	farmland	Tiaodunhe	24	1	2
2014-2015	potato	1	farmland	Tiaodunhe	29	3	2
2014-2015	potato	1	farmland	Tiaodunhe	34	1	1
2014-2015	potato	2	farmland	Dahaizi	9	2	2
2014-2015	potato	2	farmland	Dahaizi	15	1	1
2014-2015	potato	2	farmland	Dahaizi	15	6	3
2014-2015	potato	2	farmland	Tiaodunhe	32	5	3
2014-2015	potato	2	farmland	Tiaodunhe	33	0	3
2014-2015	potato	2	farmland	Tiaodunhe	43	1	2
2014-2015	invertebrate	11	grassland	Dahaizi	1	1	2.5
2014-2015	invertebrate	11	grassland	Dahaizi	1	1	2
2014-2015	invertebrate	11	grassland	Dahaizi	1	1	4
2014-2015	invertebrate	11	grassland	Dahaizi	1	1	2
2014-2015	invertebrate	11	grassland	Dahaizi	1	1	1.5
2014-2015	invertebrate	11	grassland	Dahaizi	1	1	3
2014-2015	invertebrate	11	grassland	Dahaizi	1	1	3
2014-2015	invertebrate	11	grassland	Dahaizi	1	1	3
2014-2015	invertebrate	11	grassland	Dahaizi	2	1	0.5
2014-2015	invertebrate	11	grassland	Dahaizi	2	1	0.5
2014-2015	invertebrate	11	grassland	Dahaizi	2	1	0.5
2014-2015	invertebrate	11	grassland	Dahaizi	2	1	0.5
2014-2015	invertebrate	11	grassland	Dahaizi	2	1	0.5
2014-2015	invertebrate	11	grassland	Dahaizi	2	1	0.5
2014-2015	invertebrate	11	grassland	Dahaizi	2	1	0.5
2014-2015	invertebrate	11	grassland	Dahaizi	2	1	0.5
2014-2015	invertebrate	11	grassland	Dahaizi	2	1	0.5
2014-2015	invertebrate	11	grassland	Dahaizi	2	1	0.5
2014-2015	invertebrate	11	grassland	Dahaizi	2	1	0.5
2014-2015	invertebrate	11	grassland	Dahaizi	2	1	0.5
2014-2015	invertebrate	11	grassland	Dahaizi	2	1	0.5
2014-2015	invertebrate	11	grassland	Dahaizi	2	1	0.4
2014-2015	invertebrate	11	grassland	Dahaizi	2	1	0.4
2014-2015	invertebrate	11	grassland	Dahaizi	2	1	0.4
2014-2015	invertebrate	11	grassland	Dahaizi	2	1	0.4
2014-2015	invertebrate	11	grassland	Dahaizi	2	1	0.3
2014-2015	invertebrate	11	grassland	Dahaizi	2	1	1
2014-2015	invertebrate	11	grassland	Dahaizi	2	1	1
2014-2015	invertebrate	11	grassland	Dahaizi	2	1	1
2014-2015	invertebrate	11	grassland	Dahaizi	2	1	1
2014-2015	invertebrate	11	grassland	Dahaizi	2	1	1
2014-2015	invertebrate	11	grassland	Dahaizi	2	1	1
2014-2015	invertebrate	11	grassland	Dahaizi	2	1	1
2014-2015	invertebrate	11	grassland	Dahaizi	2	1	1
2014-2015	invertebrate	11	grassland	Dahaizi	2	1	1
2014-2015	invertebrate	11	grassland	Dahaizi	2	1	1
2014-2015	invertebrate	11	grassland	Dahaizi	2	1	1
2014-2015	invertebrate	11	grassland	Dahaizi	2	1	1
2014-2015	invertebrate	11	grassland	Dahaizi	2	1	1
2014-2015	invertebrate	11	grassland	Dahaizi	2	1	1
2014-2015	invertebrate	11	grassland	Dahaizi	2	1	1
2014-2015	invertebrate	11	grassland	Dahaizi	2	1	1
2014-2015	invertebrate	11	grassland	Dahaizi	2	1	1
2014-2015	invertebrate	11	grassland	Dahaizi	2	1	1
2014-2015	invertebrate	11	grassland	Dahaizi	2	1	1
2014-2015	invertebrate	11	grassland	Dahaizi	2	1	1
2014-2015	invertebrate	11	grassland	Dahaizi	2	1	1.2
2014-2015	invertebrate	11	grassland	Dahaizi	2	1	1.2
2014-2015	invertebrate	11	grassland	Dahaizi	2	1	1.5
2014-2015	invertebrate	11	grassland	Dahaizi	2	1	1.5
2014-2015	invertebrate	11	grassland	Dahaizi	2	1	1.5
2014-2015	invertebrate	11	grassland	Dahaizi	2	1	1.5
2014-2015	invertebrate	11	grassland	Dahaizi	2	1	1.5
2014-2015	invertebrate	11	grassland	Dahaizi	2	1	1.5
2014-2015	invertebrate	11	grassland	Dahaizi	2	1	1.5
2014-2015	invertebrate	11	grassland	Dahaizi	2	1	1.5
2014-2015	invertebrate	11	grassland	Dahaizi	2	1	1.7
2014-2015	invertebrate	11	grassland	Dahaizi	2	1	1.7
2014-2015	invertebrate	11	grassland	Dahaizi	2	1	0.7
2014-2015	invertebrate	11	grassland	Dahaizi	2	1	0.7
2014-2015	invertebrate	11	grassland	Dahaizi	2	1	0.7
2014-2015	invertebrate	11	grassland	Dahaizi	2	1	2
2014-2015	invertebrate	11	grassland	Dahaizi	2	1	2
2014-2015	invertebrate	11	grassland	Dahaizi	2	1	2
2014-2015	invertebrate	11	grassland	Dahaizi	2	1	2
2014-2015	invertebrate	11	grassland	Dahaizi	2	1	2.5
2014-2015	invertebrate	11	grassland	Dahaizi	2	1	2.5
2014-2015	invertebrate	11	grassland	Dahaizi	2	1	4
2014-2015	invertebrate	11	grassland	Dahaizi	2	1	10
2014-2015	invertebrate	11	grassland	Dahaizi	2	1	10
2014-2015	invertebrate	11	grassland	Dahaizi	2	1	10
2014-2015	invertebrate	11	grassland	Dahaizi	2	1	10
2014-2015	invertebrate	11	grassland	Dahaizi	3	1	1
2014-2015	invertebrate	11	grassland	Dahaizi	3	1	1.5
2014-2015	invertebrate	11	grassland	Dahaizi	3	1	1.5
2014-2015	invertebrate	11	grassland	Dahaizi	3	1	1.5
2014-2015	invertebrate	11	grassland	Dahaizi	3	1	2
2014-2015	invertebrate	11	grassland	Dahaizi	3	1	2
2014-2015	invertebrate	11	grassland	Dahaizi	3	1	4.5
2014-2015	invertebrate	11	grassland	Dahaizi	4	1	1.5
2014-2015	invertebrate	11	grassland	Dahaizi	4	1	1.8
2014-2015	invertebrate	11	grassland	Dahaizi	4	1	2.1
2014-2015	invertebrate	11	grassland	Dahaizi	4	1	2.5
2014-2015	invertebrate	11	grassland	Dahaizi	4	1	4
2014-2015	invertebrate	11	grassland	Dahaizi	4	1	5
2014-2015	invertebrate	11	grassland	Dahaizi	5	1	0.7
2014-2015	invertebrate	11	grassland	Dahaizi	6	1	0.8
2014-2015	invertebrate	11	grassland	Dahaizi	6	1	2.3
2014-2015	invertebrate	11	grassland	Dahaizi	7	1	1
2014-2015	invertebrate	11	grassland	Dahaizi	7	1	1
2014-2015	invertebrate	11	grassland	Dahaizi	7	1	0.3
2014-2015	invertebrate	11	grassland	Dahaizi	7	1	1.2
2014-2015	invertebrate	11	grassland	Dahaizi	7	1	1.5
2014-2015	invertebrate	11	grassland	Dahaizi	7	1	1.5
2014-2015	invertebrate	11	grassland	Dahaizi	7	1	1.6
2014-2015	invertebrate	11	grassland	Dahaizi	7	1	2.2
2014-2015	invertebrate	11	grassland	Dahaizi	8	1	0.2
2014-2015	invertebrate	11	grassland	Dahaizi	8	1	0.5
2014-2015	invertebrate	11	grassland	Dahaizi	8	1	1
2014-2015	invertebrate	11	grassland	Dahaizi	8	1	1
2014-2015	invertebrate	11	grassland	Dahaizi	8	1	1.3
2014-2015	invertebrate	11	grassland	Dahaizi	8	1	1.7
2014-2015	invertebrate	11	grassland	Dahaizi	8	1	2.3
2014-2015	invertebrate	11	grassland	Dahaizi	8	1	3
2014-2015	invertebrate	11	grassland	Dahaizi	9	1	2.8
2014-2015	invertebrate	11	grassland	Dahaizi	10	1	0.8
2014-2015	invertebrate	11	grassland	Dahaizi	10	1	1
2014-2015	invertebrate	11	grassland	Dahaizi	10	1	1
2014-2015	invertebrate	11	grassland	Dahaizi	10	1	1
2014-2015	invertebrate	11	grassland	Dahaizi	10	1	1
2014-2015	invertebrate	11	grassland	Dahaizi	10	1	1.2
2014-2015	invertebrate	11	grassland	Dahaizi	10	1	1.5
2014-2015	invertebrate	11	grassland	Dahaizi	10	1	2
2014-2015	invertebrate	11	grassland	Dahaizi	10	1	2
2014-2015	invertebrate	11	grassland	Dahaizi	10	1	2
2014-2015	invertebrate	11	grassland	Dahaizi	10	1	2
2014-2015	invertebrate	11	grassland	Dahaizi	10	1	2.2
2014-2015	invertebrate	11	grassland	Dahaizi	11	1	0.3
2014-2015	invertebrate	11	grassland	Dahaizi	11	1	0.3
2014-2015	invertebrate	11	grassland	Dahaizi	11	1	0.3
2014-2015	invertebrate	11	grassland	Dahaizi	11	1	1
2014-2015	invertebrate	11	grassland	Dahaizi	11	1	1
2014-2015	invertebrate	11	grassland	Dahaizi	11	1	1
2014-2015	invertebrate	11	grassland	Dahaizi	11	1	1
2014-2015	invertebrate	11	grassland	Dahaizi	11	1	1.1
2014-2015	invertebrate	11	grassland	Dahaizi	11	1	1.1
2014-2015	invertebrate	11	grassland	Dahaizi	11	1	1.2
2014-2015	invertebrate	11	grassland	Dahaizi	11	1	1.2
2014-2015	invertebrate	11	grassland	Dahaizi	11	1	1.2
2014-2015	invertebrate	11	grassland	Dahaizi	11	1	1.2
2014-2015	invertebrate	11	grassland	Dahaizi	11	1	1.4
2014-2015	invertebrate	11	grassland	Dahaizi	11	1	1.4
2014-2015	invertebrate	11	grassland	Dahaizi	11	1	1.9
2014-2015	invertebrate	11	grassland	Dahaizi	11	1	1.9
2014-2015	invertebrate	11	grassland	Dahaizi	11	1	2
2014-2015	invertebrate	11	grassland	Dahaizi	11	1	2
2014-2015	invertebrate	11	grassland	Dahaizi	11	1	2.2
2014-2015	invertebrate	11	grassland	Dahaizi	11	1	2.2
2014-2015	invertebrate	11	grassland	Dahaizi	11	1	2.5
2014-2015	invertebrate	11	grassland	Dahaizi	11	1	2.7
2014-2015	invertebrate	11	grassland	Dahaizi	11	1	2.7
2014-2015	invertebrate	11	grassland	Dahaizi	11	1	3.7
2014-2015	invertebrate	11	grassland	Dahaizi	11	1	4.2
2014-2015	invertebrate	11	grassland	Dahaizi	11	1	4.2
2014-2015	invertebrate	11	grassland	Dahaizi	12	1	1
2014-2015	invertebrate	11	grassland	Dahaizi	12	1	1.6
2014-2015	invertebrate	11	grassland	Dahaizi	12	1	1.8
2014-2015	invertebrate	11	grassland	Dahaizi	12	1	1.8
2014-2015	invertebrate	11	grassland	Dahaizi	12	1	2
2014-2015	invertebrate	11	grassland	Dahaizi	12	1	2
2014-2015	invertebrate	11	grassland	Dahaizi	13	1	5
2014-2015	invertebrate	11	grassland	Dahaizi	13	1	4
2014-2015	invertebrate	11	grassland	Dahaizi	14	1	1
2014-2015	invertebrate	11	grassland	Dahaizi	14	1	2
2014-2015	invertebrate	11	grassland	Dahaizi	14	1	3
2014-2015	invertebrate	11	grassland	Dahaizi	14	1	3
2014-2015	invertebrate	11	grassland	Dahaizi	14	1	3
2014-2015	invertebrate	11	grassland	Dahaizi	14	1	4.2
2014-2015	invertebrate	11	grassland	Dahaizi	14	1	5
2014-2015	invertebrate	11	grassland	Dahaizi	14	1	4
2014-2015	invertebrate	11	grassland	Dahaizi	15	1	1
2014-2015	invertebrate	11	grassland	Dahaizi	15	1	1
2014-2015	invertebrate	11	grassland	Dahaizi	15	1	1
2014-2015	invertebrate	11	grassland	Dahaizi	15	1	3
2014-2015	invertebrate	11	grassland	Dahaizi	18	1	1
2014-2015	invertebrate	11	grassland	Dahaizi	18	1	1.9
2014-2015	invertebrate	11	grassland	Dahaizi	18	1	2
2014-2015	invertebrate	11	grassland	Dahaizi	18	1	3
2014-2015	invertebrate	11	grassland	Dahaizi	18	1	4
2014-2015	invertebrate	11	grassland	Dahaizi	18	1	1
2014-2015	invertebrate	11	grassland	Dahaizi	18	1	2
2014-2015	invertebrate	11	grassland	Dahaizi	19	1	2.5
2014-2015	invertebrate	11	grassland	Dahaizi	19	1	2.8
2014-2015	invertebrate	11	grassland	Dahaizi	19	1	2.8
2014-2015	invertebrate	11	grassland	Dahaizi	19	1	4.9
2014-2015	invertebrate	11	grassland	Dahaizi	19	1	5.4
2014-2015	invertebrate	11	grassland	Dahaizi	19	1	6.2
2014-2015	invertebrate	11	grassland	Dahaizi	20	1	6
2014-2015	invertebrate	11	grassland	Dahaizi	20	1	10
2014-2015	invertebrate	11	grassland	Dahaizi	21	1	4.1
2014-2015	invertebrate	11	grassland	Dahaizi	21	1	4.3
2014-2015	invertebrate	11	grassland	Dahaizi	21	1	7.5
2014-2015	invertebrate	11	grassland	Dahaizi	21	1	7.7
2014-2015	invertebrate	11	grassland	Dahaizi	22	1	2
2014-2015	invertebrate	11	grassland	Dahaizi	22	1	2.7
2014-2015	invertebrate	11	grassland	Dahaizi	22	1	3
2014-2015	invertebrate	11	grassland	Dahaizi	22	1	3.1
2014-2015	invertebrate	11	grassland	Dahaizi	22	1	3.4
2014-2015	invertebrate	11	grassland	Dahaizi	22	1	4.4
2014-2015	invertebrate	11	grassland	Dahaizi	22	1	4.4
2014-2015	invertebrate	11	grassland	Dahaizi	22	1	6.2
2014-2015	invertebrate	11	grassland	Dahaizi	22	1	6.8
2014-2015	invertebrate	11	grassland	Dahaizi	23	1	1
2014-2015	invertebrate	11	grassland	Dahaizi	23	1	2.7
2014-2015	invertebrate	11	grassland	Dahaizi	23	1	3
2014-2015	invertebrate	11	grassland	Dahaizi	23	1	3.8
2014-2015	invertebrate	11	grassland	Dahaizi	23	1	4
2014-2015	invertebrate	11	grassland	Dahaizi	23	1	4.5
2014-2015	invertebrate	11	grassland	Dahaizi	23	1	7.1
2014-2015	invertebrate	11	grassland	Tiaodunhe	24	1	3.4
2014-2015	invertebrate	11	grassland	Tiaodunhe	24	1	8.2
2014-2015	invertebrate	11	grassland	Tiaodunhe	27	1	2.7
2014-2015	invertebrate	11	grassland	Tiaodunhe	28	1	1
2014-2015	invertebrate	11	grassland	Tiaodunhe	28	1	1
2014-2015	invertebrate	11	grassland	Tiaodunhe	28	1	2.4
2014-2015	invertebrate	11	grassland	Tiaodunhe	28	1	2.8
2014-2015	invertebrate	11	grassland	Tiaodunhe	28	1	2.8
2014-2015	invertebrate	11	grassland	Tiaodunhe	28	1	3
2014-2015	invertebrate	11	grassland	Tiaodunhe	28	1	3
2014-2015	invertebrate	11	grassland	Tiaodunhe	28	1	3
2014-2015	invertebrate	11	grassland	Tiaodunhe	28	1	3.5
2014-2015	invertebrate	11	grassland	Tiaodunhe	28	1	4.6
2014-2015	invertebrate	11	grassland	Tiaodunhe	28	1	5
2014-2015	invertebrate	11	grassland	Tiaodunhe	28	1	5.1
2014-2015	invertebrate	11	grassland	Tiaodunhe	28	1	6.6
2014-2015	invertebrate	11	grassland	Tiaodunhe	28	1	3
2014-2015	invertebrate	11	grassland	Tiaodunhe	30	1	1.8
2014-2015	invertebrate	11	grassland	Tiaodunhe	30	1	2.2
2014-2015	invertebrate	11	grassland	Tiaodunhe	30	1	3
2014-2015	invertebrate	11	grassland	Tiaodunhe	30	1	3.5
2014-2015	invertebrate	11	grassland	Tiaodunhe	30	1	5
2014-2015	invertebrate	11	grassland	Tiaodunhe	30	1	5.1
2014-2015	invertebrate	11	grassland	Tiaodunhe	30	1	5.6
2014-2015	invertebrate	11	grassland	Tiaodunhe	32	1	1.1
2014-2015	invertebrate	11	grassland	Tiaodunhe	32	1	5.4
2014-2015	invertebrate	11	grassland	Tiaodunhe	33	1	2.5
2014-2015	invertebrate	11	grassland	Tiaodunhe	33	1	2.8
2014-2015	invertebrate	11	grassland	Tiaodunhe	33	1	7.4
2014-2015	invertebrate	11	grassland	Tiaodunhe	34	1	6.5
2014-2015	invertebrate	11	grassland	Tiaodunhe	34	1	6.5
2014-2015	invertebrate	12	grassland	Dahaizi	1	1	2.8
2014-2015	invertebrate	12	grassland	Dahaizi	1	1	2
2014-2015	invertebrate	12	grassland	Dahaizi	1	1	3.6
2014-2015	invertebrate	12	grassland	Dahaizi	1	1	3
2014-2015	invertebrate	12	grassland	Dahaizi	2	1	3.5
2014-2015	invertebrate	12	grassland	Dahaizi	2	1	5.4
2014-2015	invertebrate	12	grassland	Dahaizi	3	1	2.1
2014-2015	invertebrate	12	grassland	Dahaizi	3	1	5
2014-2015	invertebrate	12	grassland	Dahaizi	3	1	3.4
2014-2015	invertebrate	12	grassland	Dahaizi	3	1	2.5
2014-2015	invertebrate	12	grassland	Dahaizi	3	1	2.5
2014-2015	invertebrate	12	grassland	Dahaizi	3	1	2.5
2014-2015	invertebrate	12	grassland	Dahaizi	3	1	2.7
2014-2015	invertebrate	12	grassland	Dahaizi	3	1	2.4
2014-2015	invertebrate	12	grassland	Dahaizi	3	1	2.6
2014-2015	invertebrate	12	grassland	Dahaizi	3	1	2
2014-2015	invertebrate	12	grassland	Dahaizi	3	1	3.1
2014-2015	invertebrate	12	grassland	Dahaizi	4	1	3.3
2014-2015	invertebrate	12	grassland	Dahaizi	4	1	3.5
2014-2015	invertebrate	12	grassland	Dahaizi	4	1	3.5
2014-2015	invertebrate	12	grassland	Dahaizi	4	1	3.5
2014-2015	invertebrate	12	grassland	Dahaizi	4	1	6.2
2014-2015	invertebrate	12	grassland	Dahaizi	4	1	5
2014-2015	invertebrate	12	grassland	Dahaizi	4	1	5.6
2014-2015	invertebrate	12	grassland	Dahaizi	4	1	2.2
2014-2015	invertebrate	12	grassland	Dahaizi	4	1	4.7
2014-2015	invertebrate	12	grassland	Dahaizi	4	1	4
2014-2015	invertebrate	12	grassland	Dahaizi	4	1	5.4
2014-2015	invertebrate	12	grassland	Dahaizi	5	1	3.4
2014-2015	invertebrate	12	grassland	Dahaizi	5	1	3.4
2014-2015	invertebrate	12	grassland	Dahaizi	5	1	2.2
2014-2015	invertebrate	12	grassland	Dahaizi	5	1	5.1
2014-2015	invertebrate	12	grassland	Dahaizi	5	1	5.1
2014-2015	invertebrate	12	grassland	Dahaizi	5	1	2.2
2014-2015	invertebrate	12	grassland	Dahaizi	5	1	3.1
2014-2015	invertebrate	12	grassland	Dahaizi	6	1	0
2014-2015	invertebrate	12	grassland	Dahaizi	7	1	2.5
2014-2015	invertebrate	12	grassland	Dahaizi	7	1	3.5
2014-2015	invertebrate	12	grassland	Dahaizi	7	1	3.4
2014-2015	invertebrate	12	grassland	Dahaizi	8	1	5.6
2014-2015	invertebrate	12	grassland	Dahaizi	9	1	0
2014-2015	invertebrate	12	grassland	Dahaizi	10	1	3.2
2014-2015	invertebrate	12	grassland	Dahaizi	10	1	3.5
2014-2015	invertebrate	12	grassland	Dahaizi	10	1	3.5
2014-2015	invertebrate	12	grassland	Dahaizi	10	1	3
2014-2015	invertebrate	12	grassland	Dahaizi	10	1	2.5
2014-2015	invertebrate	12	grassland	Dahaizi	11	1	3.5
2014-2015	invertebrate	12	grassland	Dahaizi	12	1	2.7
2014-2015	invertebrate	12	grassland	Dahaizi	12	1	2.7
2014-2015	invertebrate	12	grassland	Dahaizi	12	1	3
2014-2015	invertebrate	12	grassland	Dahaizi	12	1	5.6
2014-2015	invertebrate	12	grassland	Dahaizi	12	1	2.5
2014-2015	invertebrate	12	grassland	Dahaizi	12	1	2.6
2014-2015	invertebrate	12	grassland	Dahaizi	12	1	2.6
2014-2015	invertebrate	12	grassland	Dahaizi	12	1	2.6
2014-2015	invertebrate	12	grassland	Dahaizi	12	1	3.6
2014-2015	invertebrate	12	grassland	Dahaizi	12	1	3.6
2014-2015	invertebrate	12	grassland	Dahaizi	14	1	3.5
2014-2015	invertebrate	12	grassland	Dahaizi	14	1	3.8
2014-2015	invertebrate	12	grassland	Dahaizi	14	1	3.3
2014-2015	invertebrate	12	grassland	Dahaizi	14	1	3.3
2014-2015	invertebrate	12	grassland	Dahaizi	14	1	5.4
2014-2015	invertebrate	12	grassland	Dahaizi	14	1	5.4
2014-2015	invertebrate	12	grassland	Dahaizi	14	1	4.9
2014-2015	invertebrate	12	grassland	Dahaizi	14	1	2.6
2014-2015	invertebrate	12	grassland	Dahaizi		1	1.9
2014-2015	invertebrate	12	grassland	Dahaizi	14	1	5.6
2014-2015	invertebrate	12	grassland	Dahaizi	14	1	6.2
2014-2015	invertebrate	12	grassland	Dahaizi
2014-2015	invertebrate	12	grassland	Dahaizi
2014-2015	invertebrate	12	grassland	Dahaizi	17	1	5.2
2014-2015	invertebrate	12	grassland	Dahaizi	19	1	4.5
2014-2015	invertebrate	12	grassland	Dahaizi	19	1	3
2014-2015	invertebrate	12	grassland	Dahaizi	19	1	4.4
2014-2015	invertebrate	12	grassland	Dahaizi	19	1	5
2014-2015	invertebrate	12	grassland	Dahaizi	19	1	5
2014-2015	invertebrate	12	grassland	Dahaizi	19	1	7.4
2014-2015	invertebrate	12	grassland	Dahaizi	19	1	7.5
2014-2015	invertebrate	12	grassland	Dahaizi	19	1	7.9
2014-2015	invertebrate	12	grassland	Dahaizi	19	1	8
2014-2015	invertebrate	12	grassland	Dahaizi	20	1	2.1
2014-2015	invertebrate	12	grassland	Dahaizi	20	1	3
2014-2015	invertebrate	12	grassland	Dahaizi	21	1	5.3
2014-2015	invertebrate	12	grassland	Dahaizi	21	1	5.4
2014-2015	invertebrate	12	grassland	Dahaizi	21	1	5.5
2014-2015	invertebrate	12	grassland	Dahaizi	21	1	5.5
2014-2015	invertebrate	12	grassland	Dahaizi	21	1	5.6
2014-2015	invertebrate	12	grassland	Dahaizi	21	1	5.7
2014-2015	invertebrate	12	grassland	Dahaizi	21	1	6.8
2014-2015	invertebrate	12	grassland	Dahaizi	22	1	4.8
2014-2015	invertebrate	12	grassland	Dahaizi	22	1	6.2
2014-2015	invertebrate	12	grassland	Dahaizi	23	1	2.6
2014-2015	invertebrate	12	grassland	Dahaizi	24	1	4.3
2014-2015	invertebrate	12	grassland	Dahaizi	24	1	4.7
2014-2015	invertebrate	12	grassland	Dahaizi	24	1	6
2014-2015	invertebrate	12	grassland	Dahaizi	25	1	5.1
2014-2015	invertebrate	12	grassland	Dahaizi	25	1	5.1
2014-2015	invertebrate	12	grassland	Dahaizi	25	1	7.1
2014-2015	invertebrate	12	grassland	Dahaizi	25	1	7.1
2014-2015	invertebrate	12	grassland	Dahaizi	25	1	8.2
2014-2015	invertebrate	12	grassland	Dahaizi	25	1	8.2
2014-2015	invertebrate	12	grassland	Dahaizi	25	1	8.2
2014-2015	invertebrate	12	grassland	Tiaodunhe	27	1	5
2014-2015	invertebrate	12	grassland	Tiaodunhe	27	1	7
2014-2015	invertebrate	12	grassland	Tiaodunhe	27	1	8.5
2014-2015	invertebrate	12	grassland	Tiaodunhe	28	1	4.6
2014-2015	invertebrate	12	grassland	Tiaodunhe	28	1	2
2014-2015	invertebrate	12	grassland	Tiaodunhe	28	1	5
2014-2015	invertebrate	12	grassland	Tiaodunhe	28	1	10
2014-2015	invertebrate	12	grassland	Tiaodunhe	28	1	7
2014-2015	invertebrate	12	grassland	Tiaodunhe	29	1	0
2014-2015	invertebrate	12	grassland	Tiaodunhe	30	1	5.5
2014-2015	invertebrate	12	grassland	Tiaodunhe	31	1	8.3
2014-2015	invertebrate	12	grassland	Tiaodunhe	32	1	7.6
2014-2015	invertebrate	12	grassland	Tiaodunhe	32	1	8
2014-2015	invertebrate	12	grassland	Tiaodunhe	32	1	6
2014-2015	invertebrate	12	grassland	Tiaodunhe	32	1	8.1
2014-2015	invertebrate	12	grassland	Tiaodunhe	32	1	8.1
2014-2015	invertebrate	12	grassland	Tiaodunhe	32	1	9
2014-2015	invertebrate	12	grassland	Tiaodunhe	32	1	9.2
2014-2015	invertebrate	12	grassland	Tiaodunhe	32	1	8.8
2014-2015	invertebrate	12	grassland	Tiaodunhe	32	1	7
2014-2015	invertebrate	12	grassland	Tiaodunhe	33	1	4
2014-2015	invertebrate	12	grassland	Tiaodunhe	34	1	0
2014-2015	invertebrate	12	grassland	Tiaodunhe	35	1	5.2
2014-2015	invertebrate	12	grassland	Tiaodunhe	36	1	3.5
2014-2015	invertebrate	12	grassland	Tiaodunhe	38	1	10
2014-2015	invertebrate	1	grassland	Dahaizi	1	1	5
2014-2015	invertebrate	1	grassland	Dahaizi	1	1	3
2014-2015	invertebrate	1	grassland	Dahaizi	2	1	5.3
2014-2015	invertebrate	1	grassland	Dahaizi	2	1	4
2014-2015	invertebrate	1	grassland	Dahaizi	3	1	3.2
2014-2015	invertebrate	1	grassland	Dahaizi	3	1	1
2014-2015	invertebrate	1	grassland	Dahaizi	3	1	1
2014-2015	invertebrate	1	grassland	Dahaizi	3	1	2.8
2014-2015	invertebrate	1	grassland	Dahaizi	3	1	3.5
2014-2015	invertebrate	1	grassland	Dahaizi	3	1	3.5
2014-2015	invertebrate	1	grassland	Dahaizi	3	1	2.5
2014-2015	invertebrate	1	grassland	Dahaizi	3	1	2.6
2014-2015	invertebrate	1	grassland	Dahaizi	3	1	3.5
2014-2015	invertebrate	1	grassland	Dahaizi	3	1	3.6
2014-2015	invertebrate	1	grassland	Dahaizi	4	1	2.5
2014-2015	invertebrate	1	grassland	Dahaizi	4	1	2.6
2014-2015	invertebrate	1	grassland	Dahaizi	4	1	3
2014-2015	invertebrate	1	grassland	Dahaizi	4	1	3
2014-2015	invertebrate	1	grassland	Dahaizi	4	1	3
2014-2015	invertebrate	1	grassland	Dahaizi	4	1	3
2014-2015	invertebrate	1	grassland	Dahaizi	4	1	3
2014-2015	invertebrate	1	grassland	Dahaizi	4	1	3
2014-2015	invertebrate	1	grassland	Dahaizi	4	1	3
2014-2015	invertebrate	1	grassland	Dahaizi	4	1	3
2014-2015	invertebrate	1	grassland	Dahaizi	4	1	2.9
2014-2015	invertebrate	1	grassland	Dahaizi	4	1	2.9
2014-2015	invertebrate	1	grassland	Dahaizi	4	1	2
2014-2015	invertebrate	1	grassland	Dahaizi	4	1	3.7
2014-2015	invertebrate	1	grassland	Dahaizi	4	1	3.8
2014-2015	invertebrate	1	grassland	Dahaizi	4	1	3.8
2014-2015	invertebrate	1	grassland	Dahaizi	4	1	1
2014-2015	invertebrate	1	grassland	Dahaizi	4	1	4.5
2014-2015	invertebrate	1	grassland	Dahaizi	4	1	4.5
2014-2015	invertebrate	1	grassland	Dahaizi	4	1	7
2014-2015	invertebrate	1	grassland	Dahaizi	4	1	7
2014-2015	invertebrate	1	grassland	Dahaizi	5	1	1.8
2014-2015	invertebrate	1	grassland	Dahaizi	5	1	3.6
2014-2015	invertebrate	1	grassland	Dahaizi	5	1	3.6
2014-2015	invertebrate	1	grassland	Dahaizi	5	1	3
2014-2015	invertebrate	1	grassland	Dahaizi	5	1	3
2014-2015	invertebrate	1	grassland	Dahaizi	5	1	3
2014-2015	invertebrate	1	grassland	Dahaizi	6	1	2
2014-2015	invertebrate	1	grassland	Dahaizi	6	1	2
2014-2015	invertebrate	1	grassland	Dahaizi	6	1	2.6
2014-2015	invertebrate	1	grassland	Dahaizi	6	1	3.1
2014-2015	invertebrate	1	grassland	Dahaizi	6	1	3.1
2014-2015	invertebrate	1	grassland	Dahaizi	6	1	2.5
2014-2015	invertebrate	1	grassland	Dahaizi	6	1	2.3
2014-2015	invertebrate	1	grassland	Dahaizi	6	1	2.2
2014-2015	invertebrate	1	grassland	Dahaizi	6	1	2.2
2014-2015	invertebrate	1	grassland	Dahaizi	6	1	2.2
2014-2015	invertebrate	1	grassland	Dahaizi	6	1	4
2014-2015	invertebrate	1	grassland	Dahaizi	6	1	4.7
2014-2015	invertebrate	1	grassland	Dahaizi	6	1	4.7
2014-2015	invertebrate	1	grassland	Dahaizi	6	1	4.7
2014-2015	invertebrate	1	grassland	Dahaizi	6	1	3
2014-2015	invertebrate	1	grassland	Dahaizi	6	1	3
2014-2015	invertebrate	1	grassland	Dahaizi	6	1	3.5
2014-2015	invertebrate	1	grassland	Dahaizi	6	1	2.2
2014-2015	invertebrate	1	grassland	Dahaizi	7	1	0
2014-2015	invertebrate	1	grassland	Dahaizi	8	1	4.3
2014-2015	invertebrate	1	grassland	Dahaizi	8	1	4
2014-2015	invertebrate	1	grassland	Dahaizi	8	1	4
2014-2015	invertebrate	1	grassland	Dahaizi	8	1	4
2014-2015	invertebrate	1	grassland	Dahaizi	8	1	4
2014-2015	invertebrate	1	grassland	Dahaizi	8	1	4.5
2014-2015	invertebrate	1	grassland	Dahaizi	8	1	4.5
2014-2015	invertebrate	1	grassland	Dahaizi	8	1	4.4
2014-2015	invertebrate	1	grassland	Dahaizi	8	1	4.4
2014-2015	invertebrate	1	grassland	Dahaizi	8	1	2
2014-2015	invertebrate	1	grassland	Dahaizi	8	1	2
2014-2015	invertebrate	1	grassland	Dahaizi	9	1	4.5
2014-2015	invertebrate	1	grassland	Dahaizi	10	1	2.3
2014-2015	invertebrate	1	grassland	Dahaizi	10	1	2.5
2014-2015	invertebrate	1	grassland	Dahaizi	10	1	2
2014-2015	invertebrate	1	grassland	Dahaizi	10	1	2
2014-2015	invertebrate	1	grassland	Dahaizi	10	1	3
2014-2015	invertebrate	1	grassland	Dahaizi	10	1	3
2014-2015	invertebrate	1	grassland	Dahaizi	10	1	3
2014-2015	invertebrate	1	grassland	Dahaizi	10	1	5.5
2014-2015	invertebrate	1	grassland	Dahaizi	10	1	4
2014-2015	invertebrate	1	grassland	Dahaizi	10	1	5
2014-2015	invertebrate	1	grassland	Dahaizi	11	1	2.8
2014-2015	invertebrate	1	grassland	Dahaizi	11	1	3
2014-2015	invertebrate	1	grassland	Dahaizi	11	1	3
2014-2015	invertebrate	1	grassland	Dahaizi	11	1	4
2014-2015	invertebrate	1	grassland	Dahaizi	11	1	4
2014-2015	invertebrate	1	grassland	Dahaizi	11	1	4
2014-2015	invertebrate	1	grassland	Dahaizi	11	1	2
2014-2015	invertebrate	1	grassland	Dahaizi	11	1	5
2014-2015	invertebrate	1	grassland	Dahaizi	11	1	5
2014-2015	invertebrate	1	grassland	Dahaizi	11	1	2.8
2014-2015	invertebrate	1	grassland	Dahaizi	13	1	4
2014-2015	invertebrate	1	grassland	Dahaizi	13	1	4
2014-2015	invertebrate	1	grassland	Dahaizi	13	1	4
2014-2015	invertebrate	1	grassland	Dahaizi	13	1	6.3
2014-2015	invertebrate	1	grassland	Dahaizi	13	1	6.3
2014-2015	invertebrate	1	grassland	Dahaizi	13	1	6.3
2014-2015	invertebrate	1	grassland	Dahaizi	13	1	6.3
2014-2015	invertebrate	1	grassland	Dahaizi	13	1	6.3
2014-2015	invertebrate	1	grassland	Dahaizi	13	1	4.5
2014-2015	invertebrate	1	grassland	Dahaizi	13	1	4.5
2014-2015	invertebrate	1	grassland	Dahaizi	13	1	4.5
2014-2015	invertebrate	1	grassland	Dahaizi	13	1	4.5
2014-2015	invertebrate	1	grassland	Dahaizi	13	1	8
2014-2015	invertebrate	1	grassland	Dahaizi	13	1	6.8
2014-2015	invertebrate	1	grassland	Dahaizi	13	1	6.8
2014-2015	invertebrate	1	grassland	Dahaizi	13	1	5.5
2014-2015	invertebrate	1	grassland	Dahaizi	13	1	5.5
2014-2015	invertebrate	1	grassland	Dahaizi	13	1	3.1
2014-2015	invertebrate	1	grassland	Dahaizi	13	1	6.3
2014-2015	invertebrate	1	grassland	Dahaizi	13	1	6.5
2014-2015	invertebrate	1	grassland	Dahaizi	13	1	6.5
2014-2015	invertebrate	1	grassland	Dahaizi	13	1	6.5
2014-2015	invertebrate	1	grassland	Dahaizi	13	1	6.5
2014-2015	invertebrate	1	grassland	Dahaizi	13	1	6.5
2014-2015	invertebrate	1	grassland	Dahaizi	14	1	4
2014-2015	invertebrate	1	grassland	Dahaizi	14	1	7.6
2014-2015	invertebrate	1	grassland	Dahaizi	15	1	4
2014-2015	invertebrate	1	grassland	Dahaizi	15	1	6.5
2014-2015	invertebrate	1	grassland	Dahaizi	15	1	6.5
2014-2015	invertebrate	1	grassland	Dahaizi	15	1	4.9
2014-2015	invertebrate	1	grassland	Dahaizi	15	1	7
2014-2015	invertebrate	1	grassland	Dahaizi	15	1	6.5
2014-2015	invertebrate	1	grassland	Dahaizi	16	1	5
2014-2015	invertebrate	1	grassland	Dahaizi	16	1	8.5
2014-2015	invertebrate	1	grassland	Dahaizi	17	1	7.5
2014-2015	invertebrate	1	grassland	Dahaizi	17	1	7.5
2014-2015	invertebrate	1	grassland	Dahaizi	17	1	3
2014-2015	invertebrate	1	grassland	Dahaizi	19	1	4
2014-2015	invertebrate	1	grassland	Dahaizi	19	1	5
2014-2015	invertebrate	1	grassland	Dahaizi	20	1	3.7
2014-2015	invertebrate	1	grassland	Dahaizi	20	1	5
2014-2015	invertebrate	1	grassland	Dahaizi	20	1	8
2014-2015	invertebrate	1	grassland	Dahaizi	22	1	3
2014-2015	invertebrate	1	grassland	Dahaizi	22	1	2
2014-2015	invertebrate	1	grassland	Dahaizi	22	1	2.5
2014-2015	invertebrate	1	grassland	Dahaizi	22	1	3.2
2014-2015	invertebrate	1	grassland	Dahaizi	22	1	4
2014-2015	invertebrate	1	grassland	Dahaizi	22	1	4
2014-2015	invertebrate	1	grassland	Dahaizi	22	1	2.3
2014-2015	invertebrate	1	grassland	Dahaizi	22	1	3
2014-2015	invertebrate	1	grassland	Dahaizi	22	1	3.7
2014-2015	invertebrate	1	grassland	Dahaizi	23	1	4.7
2014-2015	invertebrate	1	grassland	Dahaizi	24	1	3.9
2014-2015	invertebrate	1	grassland	Dahaizi	25	1	6.2
2014-2015	invertebrate	1	grassland	Dahaizi	26	1	3
2014-2015	invertebrate	1	grassland	Dahaizi	26	1	3
2014-2015	invertebrate	1	grassland	Dahaizi	26	1	3
2014-2015	invertebrate	1	grassland	Dahaizi	26	1	5
2014-2015	invertebrate	1	grassland	Dahaizi	26	1	5
2014-2015	invertebrate	1	grassland	Dahaizi	26	1	5
2014-2015	invertebrate	1	grassland	Dahaizi	26	1	5
2014-2015	invertebrate	1	grassland	Dahaizi	26	1	5
2014-2015	invertebrate	1	grassland	Dahaizi	26	1	5
2014-2015	invertebrate	1	grassland	Dahaizi	26	1	5
2014-2015	invertebrate	1	grassland	Dahaizi	26	1	3.9
2014-2015	invertebrate	1	grassland	Dahaizi	26	1	4.5
2014-2015	invertebrate	1	grassland	Dahaizi	26	1	4.5
2014-2015	invertebrate	1	grassland	Dahaizi	26	1	4.5
2014-2015	invertebrate	1	grassland	Dahaizi	26	1	5.5
2014-2015	invertebrate	1	grassland	Dahaizi	27	1	4
2014-2015	invertebrate	1	grassland	Dahaizi	27	1	4.2
2014-2015	invertebrate	1	grassland	Dahaizi	27	1	4.5
2014-2015	invertebrate	1	grassland	Dahaizi	27	1	5
2014-2015	invertebrate	1	grassland	Dahaizi	27	1	3.5
2014-2015	invertebrate	1	grassland	Dahaizi	27	1	4.1
2014-2015	invertebrate	1	grassland	Tiaodunhe	32	1	6
2014-2015	invertebrate	1	grassland	Tiaodunhe	32	1	7
2014-2015	invertebrate	1	grassland	Tiaodunhe	32	1	7
2014-2015	invertebrate	1	grassland	Tiaodunhe	33	1	4.7
2014-2015	invertebrate	1	grassland	Tiaodunhe	33	1	7.4
2014-2015	invertebrate	1	grassland	Tiaodunhe	36	1	2.5
2014-2015	invertebrate	1	grassland	Tiaodunhe	36	1	4.5
2014-2015	invertebrate	1	grassland	Tiaodunhe	36	1	5
2014-2015	invertebrate	1	grassland	Tiaodunhe	36	1	7
2014-2015	invertebrate	1	grassland	Tiaodunhe	36	1	7
2014-2015	invertebrate	1	grassland	Tiaodunhe	37	1	0.7
2014-2015	invertebrate	1	grassland	Tiaodunhe	37	1	0.7
2014-2015	invertebrate	1	grassland	Tiaodunhe	37	1	0.7
2014-2015	invertebrate	1	grassland	Tiaodunhe	37	1	0.7
2014-2015	invertebrate	1	grassland	Tiaodunhe	38	1	8
2014-2015	invertebrate	1	grassland	Tiaodunhe	39	1	2
2014-2015	invertebrate	1	grassland	Tiaodunhe	39	1	2
2014-2015	invertebrate	1	grassland	Tiaodunhe	39	1	3.9
2014-2015	invertebrate	1	grassland	Tiaodunhe	39	1	5.5
2014-2015	invertebrate	1	grassland	Tiaodunhe	39	1	9.5
2014-2015	invertebrate	1	grassland	Tiaodunhe	39	1	9.5
2014-2015	invertebrate	1	grassland	Tiaodunhe	39	1	3.5
2014-2015	invertebrate	1	grassland	Tiaodunhe	39	1	3.5
2014-2015	invertebrate	1	grassland	Tiaodunhe	39	1	3.5
2014-2015	invertebrate	1	grassland	Tiaodunhe	39	1	3.5
2014-2015	invertebrate	1	grassland	Tiaodunhe	39	1	5.2
2014-2015	invertebrate	1	grassland	Tiaodunhe	39	1	3
2014-2015	invertebrate	1	grassland	Tiaodunhe	39	1	4
2014-2015	invertebrate	1	grassland	Tiaodunhe	39	1	4
2014-2015	invertebrate	1	grassland	Tiaodunhe	39	1	4.5
2014-2015	invertebrate	1	grassland	Tiaodunhe	39	1	10
2014-2015	invertebrate	2	grassland	Dahaizi	9	1	2
2014-2015	invertebrate	2	grassland	Dahaizi	9	1	2
2014-2015	invertebrate	2	grassland	Dahaizi	9	1	2
2014-2015	invertebrate	2	grassland	Dahaizi	9	1	2
2014-2015	invertebrate	2	grassland	Dahaizi	9	1	2
2014-2015	invertebrate	2	grassland	Dahaizi	9	1	2
2014-2015	invertebrate	2	grassland	Dahaizi	9	1	2
2014-2015	invertebrate	2	grassland	Dahaizi	9	1	2
2014-2015	invertebrate	2	grassland	Dahaizi	9	1	2
2014-2015	invertebrate	2	grassland	Dahaizi	9	1	1.8
2014-2015	invertebrate	2	grassland	Dahaizi	9	1	1.8
2014-2015	invertebrate	2	grassland	Dahaizi	9	1	1.8
2014-2015	invertebrate	2	grassland	Dahaizi	9	1	3.5
2014-2015	invertebrate	2	grassland	Dahaizi	9	1	3.5
2014-2015	invertebrate	2	grassland	Dahaizi	9	1	3.5
2014-2015	invertebrate	2	grassland	Dahaizi	9	1	3.5
2014-2015	invertebrate	2	grassland	Dahaizi	9	1	3.5
2014-2015	invertebrate	2	grassland	Dahaizi	9	1	3
2014-2015	invertebrate	2	grassland	Dahaizi	9	1	3
2014-2015	invertebrate	2	grassland	Dahaizi	9	1	3
2014-2015	invertebrate	2	grassland	Dahaizi	9	1	3
2014-2015	invertebrate	2	grassland	Dahaizi	9	1	3
2014-2015	invertebrate	2	grassland	Dahaizi	9	1	3
2014-2015	invertebrate	2	grassland	Dahaizi	9	1	3
2014-2015	invertebrate	2	grassland	Dahaizi	9	1	3
2014-2015	invertebrate	2	grassland	Dahaizi	9	1	3
2014-2015	invertebrate	2	grassland	Dahaizi	9	1	3
2014-2015	invertebrate	2	grassland	Dahaizi	9	1	3
2014-2015	invertebrate	2	grassland	Dahaizi	9	1	3
2014-2015	invertebrate	2	grassland	Dahaizi	9	1	3
2014-2015	invertebrate	2	grassland	Dahaizi	9	1	3
2014-2015	invertebrate	2	grassland	Dahaizi	9	1	3
2014-2015	invertebrate	2	grassland	Dahaizi	9	1	3
2014-2015	invertebrate	2	grassland	Dahaizi	9	1	3
2014-2015	invertebrate	2	grassland	Dahaizi	9	1	3
2014-2015	invertebrate	2	grassland	Dahaizi	9	1	3
2014-2015	invertebrate	2	grassland	Dahaizi	9	1	3
2014-2015	invertebrate	2	grassland	Dahaizi	9	1	3
2014-2015	invertebrate	2	grassland	Dahaizi	9	1	3
2014-2015	invertebrate	2	grassland	Dahaizi	9	1	3
2014-2015	invertebrate	2	grassland	Dahaizi	9	1	3
2014-2015	invertebrate	2	grassland	Dahaizi	9	1	3
2014-2015	invertebrate	2	grassland	Dahaizi	9	1	7.5
2014-2015	invertebrate	2	grassland	Dahaizi	6	1	1
2014-2015	invertebrate	2	grassland	Dahaizi	6	1	2.5
2014-2015	invertebrate	2	grassland	Dahaizi	6	1	2.5
2014-2015	invertebrate	2	grassland	Dahaizi	6	1	3
2014-2015	invertebrate	2	grassland	Dahaizi	6	1	3
2014-2015	invertebrate	2	grassland	Dahaizi	6	1	4
2014-2015	invertebrate	2	grassland	Dahaizi	6	1	4
2014-2015	invertebrate	2	grassland	Dahaizi	6	1	4
2014-2015	invertebrate	2	grassland	Dahaizi	6	1	4
2014-2015	invertebrate	2	grassland	Dahaizi	6	1	4
2014-2015	invertebrate	2	grassland	Dahaizi	6	1	4
2014-2015	invertebrate	2	grassland	Dahaizi	6	1	4
2014-2015	invertebrate	2	grassland	Dahaizi	6	1	8
2014-2015	invertebrate	2	grassland	Dahaizi	6	1	5
2014-2015	invertebrate	2	grassland	Dahaizi	36	1	2.8
2014-2015	invertebrate	2	grassland	Dahaizi	36	1	3
2014-2015	invertebrate	2	grassland	Dahaizi	36	1	3.5
2014-2015	invertebrate	2	grassland	Dahaizi	36	1	3.6
2014-2015	invertebrate	2	grassland	Dahaizi	36	1	5
2014-2015	invertebrate	2	grassland	Dahaizi	36	1	6
2014-2015	invertebrate	2	grassland	Dahaizi	36	1	6.9
2014-2015	invertebrate	2	grassland	Dahaizi	38	1	3
2014-2015	invertebrate	2	grassland	Dahaizi	38	1	3
2014-2015	invertebrate	2	grassland	Dahaizi	38	1	3
2014-2015	invertebrate	2	grassland	Dahaizi	38	1	3
2014-2015	invertebrate	2	grassland	Dahaizi	38	1	1
2014-2015	invertebrate	2	grassland	Dahaizi	38	1	3.6
2014-2015	invertebrate	2	grassland	Dahaizi	38	1	3.8
2014-2015	invertebrate	2	grassland	Dahaizi	38	1	3.8
2014-2015	invertebrate	2	grassland	Dahaizi	38	1	3.8
2014-2015	invertebrate	2	grassland	Dahaizi	38	1	5
2014-2015	invertebrate	2	grassland	Dahaizi	5	1	2
2014-2015	invertebrate	2	grassland	Dahaizi	5	1	2.5
2014-2015	invertebrate	2	grassland	Dahaizi	5	1	3.5
2014-2015	invertebrate	2	grassland	Dahaizi	5	1	4
2014-2015	invertebrate	2	grassland	Dahaizi	5	1	5
2014-2015	invertebrate	2	grassland	Dahaizi	5	1	5
2014-2015	invertebrate	2	grassland	Dahaizi	5	1	5
2014-2015	invertebrate	2	grassland	Dahaizi	5	1	5
2014-2015	invertebrate	2	grassland	Dahaizi	5	1	5
2014-2015	invertebrate	2	grassland	Dahaizi	5	1	5
2014-2015	invertebrate	2	grassland	Dahaizi	5	1	5
2014-2015	invertebrate	2	grassland	Dahaizi	5	1	5
2014-2015	invertebrate	2	grassland	Dahaizi	5	1	5
2014-2015	invertebrate	2	grassland	Dahaizi	5	1	5
2014-2015	invertebrate	2	grassland	Dahaizi	5	1	5
2014-2015	invertebrate	2	grassland	Dahaizi	5	1	5
2014-2015	invertebrate	2	grassland	Dahaizi	5	1	5.2
2014-2015	invertebrate	2	grassland	Dahaizi	5	1	5.2
2014-2015	invertebrate	2	grassland	Dahaizi	5	1	5.2
2014-2015	invertebrate	2	grassland	Dahaizi	5	1	5.2
2014-2015	invertebrate	2	grassland	Dahaizi	32	1	4
2014-2015	invertebrate	2	grassland	Dahaizi	37	1	5
2014-2015	invertebrate	2	grassland	Dahaizi	37	1	5
2014-2015	invertebrate	2	grassland	Dahaizi	37	1	5.4
2014-2015	invertebrate	2	grassland	Dahaizi	37	1	6
2014-2015	invertebrate	2	grassland	Dahaizi	5	1	2
2014-2015	invertebrate	2	grassland	Dahaizi	5	1	2.5
2014-2015	invertebrate	2	grassland	Dahaizi	5	1	2.5
2014-2015	invertebrate	2	grassland	Dahaizi	5	1	2.5
2014-2015	invertebrate	2	grassland	Dahaizi	5	1	2.5
2014-2015	invertebrate	2	grassland	Dahaizi	5	1	4.4
2014-2015	invertebrate	2	grassland	Dahaizi	2	1	1.9
2014-2015	invertebrate	2	grassland	Dahaizi	2	1	4.5
2014-2015	invertebrate	2	grassland	Dahaizi	2	1	5
2014-2015	invertebrate	2	grassland	Dahaizi	10	1	4.3
2014-2015	invertebrate	2	grassland	Dahaizi	10	1	6.2
2014-2015	invertebrate	2	grassland	Dahaizi	10	1	1
2014-2015	invertebrate	2	grassland	Dahaizi	10	1	2.5
2014-2015	invertebrate	2	grassland	Dahaizi	10	1	3.7
2014-2015	invertebrate	2	grassland	Dahaizi	10	1	3.7
2014-2015	invertebrate	2	grassland	Dahaizi	10	1	6
2014-2015	invertebrate	2	grassland	Dahaizi	10	1	6
2014-2015	invertebrate	2	grassland	Dahaizi	10	1	3
2014-2015	invertebrate	2	grassland	Dahaizi	3	1	3
2014-2015	invertebrate	2	grassland	Dahaizi	3	1	3.8
2014-2015	invertebrate	2	grassland	Dahaizi	3	1	5
2014-2015	invertebrate	2	grassland	Dahaizi	3	1	5
2014-2015	invertebrate	2	grassland	Dahaizi	3	1	5
2014-2015	invertebrate	2	grassland	Dahaizi	3	1	5
2014-2015	invertebrate	2	grassland	Dahaizi	3	1	5
2014-2015	invertebrate	2	grassland	Dahaizi	3	1	5
2014-2015	invertebrate	2	grassland	Dahaizi	3	1	5
2014-2015	invertebrate	2	grassland	Dahaizi	3	1	6.4
2014-2015	invertebrate	2	grassland	Dahaizi	35	1	3
2014-2015	invertebrate	2	grassland	Dahaizi	35	1	7
2014-2015	invertebrate	2	grassland	Dahaizi	35	1	7
2014-2015	invertebrate	2	grassland	Tiaodunhe	5	1	4
2014-2015	invertebrate	2	grassland	Tiaodunhe	5	1	4
2014-2015	invertebrate	2	grassland	Tiaodunhe	5	1	4
2014-2015	invertebrate	2	grassland	Tiaodunhe	5	1	4
2014-2015	invertebrate	2	grassland	Tiaodunhe	5	1	6.5
2014-2015	invertebrate	2	grassland	Tiaodunhe	5	1	7.5
2014-2015	invertebrate	2	grassland	Tiaodunhe	5	1	7.5
2014-2015	invertebrate	2	grassland	Tiaodunhe	5	1	7.5
2014-2015	invertebrate	2	grassland	Tiaodunhe	7	1	2.2
2014-2015	invertebrate	2	grassland	Tiaodunhe	7	1	3.3
2014-2015	invertebrate	2	grassland	Tiaodunhe	7	1	3.5
2014-2015	invertebrate	2	grassland	Tiaodunhe	7	1	4
2014-2015	invertebrate	2	grassland	Tiaodunhe	7	1	3.6
2014-2015	invertebrate	2	grassland	Tiaodunhe	7	1	4.4
2014-2015	invertebrate	2	grassland	Tiaodunhe	7	1	4.6
2014-2015	invertebrate	2	grassland	Tiaodunhe	7	1	5.2
2014-2015	invertebrate	2	grassland	Tiaodunhe	7	1	6.8
2014-2015	invertebrate	2	grassland	Tiaodunhe	2	1	3.9
2014-2015	invertebrate	2	grassland	Tiaodunhe	2	1	3.9
2014-2015	invertebrate	2	grassland	Tiaodunhe	2	1	3.9
2014-2015	invertebrate	2	grassland	Tiaodunhe	2	1	4
2014-2015	invertebrate	2	grassland	Tiaodunhe	2	1	5
2014-2015	invertebrate	2	grassland	Tiaodunhe	2	1	5
2014-2015	invertebrate	2	grassland	Tiaodunhe	38	1	3.2
2014-2015	invertebrate	2	grassland	Tiaodunhe	38	1	4
2014-2015	invertebrate	2	grassland	Tiaodunhe	38	1	7.5
2014-2015	invertebrate	2	grassland	Tiaodunhe	4	1	4.8
2014-2015	invertebrate	2	grassland	Tiaodunhe	1	1	2.4
2014-2015	invertebrate	2	grassland	Tiaodunhe	1	1	2.4
2014-2015	invertebrate	2	grassland	Tiaodunhe	1	1	3.3
2014-2015	invertebrate	2	grassland	Tiaodunhe	1	1	5
2014-2015	invertebrate	2	grassland	Tiaodunhe	6	1	4
2014-2015	invertebrate	2	grassland	Tiaodunhe	6	1	4
2014-2015	invertebrate	2	grassland	Tiaodunhe	6	1	5.5
2014-2015	invertebrate	2	grassland	Tiaodunhe	6	1	4.5
2014-2015	invertebrate	2	grassland	Tiaodunhe	30	1	5.2
2013-2014	invertebrate	11	grassland	Dahaizi	1	1	3
2013-2014	invertebrate	11	grassland	Dahaizi	1	1	3
2013-2014	invertebrate	11	grassland	Dahaizi	1	1	3
2013-2014	invertebrate	11	grassland	Dahaizi	1	1	3
2013-2014	invertebrate	11	grassland	Dahaizi	1	1	3
2013-2014	invertebrate	11	grassland	Dahaizi	1	1	4
2013-2014	invertebrate	11	grassland	Dahaizi	1	1	4
2013-2014	invertebrate	11	grassland	Dahaizi	1	1	4
2013-2014	invertebrate	11	grassland	Dahaizi	1	1	4
2013-2014	invertebrate	11	grassland	Dahaizi	1	1	4
2013-2014	invertebrate	11	grassland	Dahaizi	2	1	2
2013-2014	invertebrate	11	grassland	Dahaizi	2	1	2
2013-2014	invertebrate	11	grassland	Dahaizi	2	1	2
2013-2014	invertebrate	11	grassland	Dahaizi	2	1	3
2013-2014	invertebrate	11	grassland	Dahaizi	2	1	3
2013-2014	invertebrate	11	grassland	Dahaizi	2	1	4
2013-2014	invertebrate	11	grassland	Dahaizi	2	1	4
2013-2014	invertebrate	11	grassland	Dahaizi	2	1	4
2013-2014	invertebrate	11	grassland	Dahaizi	3	1	6
2013-2014	invertebrate	11	grassland	Dahaizi	3	1	10
2013-2014	invertebrate	11	grassland	Dahaizi	3	1	2
2013-2014	invertebrate	11	grassland	Dahaizi	3	1	3
2013-2014	invertebrate	11	grassland	Dahaizi	1	1	1
2013-2014	invertebrate	11	grassland	Dahaizi	1	1	1
2013-2014	invertebrate	11	grassland	Dahaizi	1	1	1
2013-2014	invertebrate	11	grassland	Dahaizi	1	1	1
2013-2014	invertebrate	11	grassland	Dahaizi	1	1	1
2013-2014	invertebrate	11	grassland	Dahaizi	1	1	1
2013-2014	invertebrate	11	grassland	Dahaizi	1	1	1
2013-2014	invertebrate	11	grassland	Dahaizi	1	1	1
2013-2014	invertebrate	11	grassland	Dahaizi	1	1	1
2013-2014	invertebrate	11	grassland	Dahaizi	1	1	1
2013-2014	invertebrate	11	grassland	Dahaizi	1	1	1
2013-2014	invertebrate	11	grassland	Dahaizi	1	1	1
2013-2014	invertebrate	11	grassland	Dahaizi	1	1	1
2013-2014	invertebrate	11	grassland	Dahaizi	1	1	1
2013-2014	invertebrate	11	grassland	Dahaizi	1	1	1
2013-2014	invertebrate	11	grassland	Dahaizi	1	1	1
2013-2014	invertebrate	11	grassland	Dahaizi	1	1	1
2013-2014	invertebrate	11	grassland	Dahaizi	1	1	1
2013-2014	invertebrate	11	grassland	Dahaizi	1	1	1
2013-2014	invertebrate	11	grassland	Dahaizi	1	1	1
2013-2014	invertebrate	11	grassland	Dahaizi	1	1	2
2013-2014	invertebrate	11	grassland	Dahaizi	1	1	2
2013-2014	invertebrate	11	grassland	Dahaizi	1	1	2
2013-2014	invertebrate	11	grassland	Dahaizi	1	1	3
2013-2014	invertebrate	11	grassland	Dahaizi	1	1	3
2013-2014	invertebrate	11	grassland	Dahaizi	1	1	3
2013-2014	invertebrate	11	grassland	Dahaizi	1	1	3
2013-2014	invertebrate	11	grassland	Dahaizi	1	1	3
2013-2014	invertebrate	11	grassland	Dahaizi	1	1	3
2013-2014	invertebrate	11	grassland	Dahaizi	1	1	3
2013-2014	invertebrate	11	grassland	Dahaizi	1	1	3
2013-2014	invertebrate	11	grassland	Dahaizi	1	1	3
2013-2014	invertebrate	11	grassland	Dahaizi	1	1	3
2013-2014	invertebrate	11	grassland	Dahaizi	1	1	5
2013-2014	invertebrate	11	grassland	Dahaizi	1	1	5
2013-2014	invertebrate	11	grassland	Dahaizi	2	1	1
2013-2014	invertebrate	11	grassland	Dahaizi	2	1	1
2013-2014	invertebrate	11	grassland	Dahaizi	2	1	1
2013-2014	invertebrate	11	grassland	Dahaizi	2	1	1
2013-2014	invertebrate	11	grassland	Dahaizi	2	1	1
2013-2014	invertebrate	11	grassland	Dahaizi	2	1	1
2013-2014	invertebrate	11	grassland	Dahaizi	2	1	1
2013-2014	invertebrate	11	grassland	Dahaizi	2	1	1
2013-2014	invertebrate	11	grassland	Dahaizi	2	1	1
2013-2014	invertebrate	11	grassland	Dahaizi	2	1	1
2013-2014	invertebrate	11	grassland	Dahaizi	2	1	1
2013-2014	invertebrate	11	grassland	Dahaizi	2	1	1
2013-2014	invertebrate	11	grassland	Dahaizi	2	1	1
2013-2014	invertebrate	11	grassland	Dahaizi	2	1	1
2013-2014	invertebrate	11	grassland	Dahaizi	2	1	1
2013-2014	invertebrate	11	grassland	Dahaizi	2	1	2
2013-2014	invertebrate	11	grassland	Dahaizi	2	1	3
2013-2014	invertebrate	11	grassland	Dahaizi	2	1	3
2013-2014	invertebrate	11	grassland	Dahaizi	2	1	3
2013-2014	invertebrate	11	grassland	Dahaizi	2	1	3
2013-2014	invertebrate	11	grassland	Dahaizi	2	1	4
2013-2014	invertebrate	11	grassland	Dahaizi	2	1	5
2013-2014	invertebrate	11	grassland	Dahaizi	2	1	6
2013-2014	invertebrate	11	grassland	Dahaizi	3	1	1
2013-2014	invertebrate	11	grassland	Dahaizi	3	1	1
2013-2014	invertebrate	11	grassland	Dahaizi	3	1	1
2013-2014	invertebrate	11	grassland	Dahaizi	3	1	1
2013-2014	invertebrate	11	grassland	Dahaizi	3	1	1
2013-2014	invertebrate	11	grassland	Dahaizi	3	1	1
2013-2014	invertebrate	11	grassland	Dahaizi	3	1	1
2013-2014	invertebrate	11	grassland	Dahaizi	3	1	2
2013-2014	invertebrate	11	grassland	Dahaizi	3	1	3
2013-2014	invertebrate	11	grassland	Dahaizi	3	1	3
2013-2014	invertebrate	12	grassland	Dahaizi	1	1	1
2013-2014	invertebrate	12	grassland	Dahaizi	1	1	1
2013-2014	invertebrate	12	grassland	Dahaizi	1	1	1
2013-2014	invertebrate	12	grassland	Dahaizi	1	1	1
2013-2014	invertebrate	12	grassland	Dahaizi	1	1	1
2013-2014	invertebrate	12	grassland	Dahaizi	1	1	2
2013-2014	invertebrate	12	grassland	Dahaizi	1	1	2
2013-2014	invertebrate	12	grassland	Dahaizi	1	1	2
2013-2014	invertebrate	12	grassland	Dahaizi	1	1	2
2013-2014	invertebrate	12	grassland	Dahaizi	1	1	2
2013-2014	invertebrate	12	grassland	Dahaizi	2	1	1
2013-2014	invertebrate	12	grassland	Dahaizi	2	1	1
2013-2014	invertebrate	12	grassland	Dahaizi	2	1	2
2013-2014	invertebrate	12	grassland	Dahaizi	2	1	3
2013-2014	invertebrate	12	grassland	Dahaizi	2	1	3
2013-2014	invertebrate	12	grassland	Dahaizi	2	1	3
2013-2014	invertebrate	12	grassland	Dahaizi	2	1	3
2013-2014	invertebrate	12	grassland	Dahaizi	2	1	4
2013-2014	invertebrate	12	grassland	Dahaizi	2	1	5
2013-2014	invertebrate	12	grassland	Dahaizi	2	1	6
2013-2014	invertebrate	12	grassland	Dahaizi	2	1	6
2013-2014	invertebrate	12	grassland	Dahaizi	2	1	6
2013-2014	invertebrate	12	grassland	Dahaizi	2	1	6
2013-2014	invertebrate	12	grassland	Dahaizi	2	1	7
2013-2014	invertebrate	12	grassland	Dahaizi	3	1	1
2013-2014	invertebrate	12	grassland	Dahaizi	3	1	1
2013-2014	invertebrate	12	grassland	Dahaizi	3	1	1
2013-2014	invertebrate	12	grassland	Dahaizi	3	1	1
2013-2014	invertebrate	12	grassland	Dahaizi	3	1	1
2013-2014	invertebrate	12	grassland	Dahaizi	3	1	1
2013-2014	invertebrate	12	grassland	Dahaizi	3	1	1
2013-2014	invertebrate	12	grassland	Dahaizi	3	1	1
2013-2014	invertebrate	12	grassland	Dahaizi	3	1	1
2013-2014	invertebrate	12	grassland	Dahaizi	3	1	1
2013-2014	invertebrate	12	grassland	Dahaizi	3	1	2
2013-2014	invertebrate	12	grassland	Dahaizi	3	1	2
2013-2014	invertebrate	12	grassland	Dahaizi	3	1	2
2013-2014	invertebrate	12	grassland	Dahaizi	3	1	3
2013-2014	invertebrate	12	grassland	Dahaizi	3	1	3
2013-2014	invertebrate	12	grassland	Dahaizi	3	1	4
2013-2014	invertebrate	12	grassland	Dahaizi	1	1	2
2013-2014	invertebrate	12	grassland	Dahaizi	1	1	2
2013-2014	invertebrate	12	grassland	Dahaizi	2	1	1
2013-2014	invertebrate	12	grassland	Dahaizi	2	1	1
2013-2014	invertebrate	12	grassland	Dahaizi	2	1	1
2013-2014	invertebrate	12	grassland	Dahaizi	2	1	2
2013-2014	invertebrate	12	grassland	Dahaizi	2	1	2
2013-2014	invertebrate	12	grassland	Dahaizi	2	1	2
2013-2014	invertebrate	12	grassland	Dahaizi	2	1	4
2013-2014	invertebrate	12	grassland	Dahaizi	2	1	4
2013-2014	invertebrate	12	grassland	Dahaizi	2	1	5
2013-2014	invertebrate	12	grassland	Dahaizi	3	1	1
2013-2014	invertebrate	12	grassland	Dahaizi	3	1	2
2013-2014	invertebrate	12	grassland	Dahaizi	3	1	2
2013-2014	invertebrate	12	grassland	Dahaizi	3	1	2
2013-2014	invertebrate	12	grassland	Dahaizi	3	1	2
2013-2014	invertebrate	12	grassland	Dahaizi	3	1	3
2013-2014	invertebrate	12	grassland	Dahaizi	3	1	5
2013-2014	invertebrate	12	grassland	Dahaizi	3	1	7
2013-2014	invertebrate	12	grassland	Dahaizi	3	1	4
2013-2014	invertebrate	12	grassland	Dahaizi	3	1	3
2013-2014	invertebrate	12	grassland	Dahaizi	3	1	3
2013-2014	invertebrate	1	grassland	Dahaizi	1	1	3
2013-2014	invertebrate	1	grassland	Dahaizi	2	1	2
2013-2014	invertebrate	1	grassland	Dahaizi	2	1	3
2013-2014	invertebrate	1	grassland	Dahaizi	2	1	3
2013-2014	invertebrate	1	grassland	Dahaizi	2	1	3
2013-2014	invertebrate	1	grassland	Dahaizi	2	1	4
2013-2014	invertebrate	1	grassland	Dahaizi	2	1	5
2013-2014	invertebrate	1	grassland	Dahaizi	2	1	5
2013-2014	invertebrate	1	grassland	Dahaizi	2	1	5
2013-2014	invertebrate	1	grassland	Dahaizi	3	1	1
2013-2014	invertebrate	1	grassland	Dahaizi	3	1	2
2013-2014	invertebrate	1	grassland	Dahaizi	3	1	2
2013-2014	invertebrate	1	grassland	Dahaizi	3	1	4
2013-2014	invertebrate	1	grassland	Dahaizi	3	1	4
2013-2014	invertebrate	1	grassland	Dahaizi	3	1	4
2013-2014	invertebrate	1	grassland	Dahaizi	3	1	4
2013-2014	invertebrate	1	grassland	Dahaizi	3	1	5
2013-2014	invertebrate	1	grassland	Dahaizi	1	1	2
2013-2014	invertebrate	1	grassland	Dahaizi	1	1	2
2013-2014	invertebrate	1	grassland	Dahaizi	1	1	2
2013-2014	invertebrate	1	grassland	Dahaizi	1	1	2
2013-2014	invertebrate	1	grassland	Dahaizi	1	1	2
2013-2014	invertebrate	1	grassland	Dahaizi	1	1	3
2013-2014	invertebrate	1	grassland	Dahaizi	1	1	3
2013-2014	invertebrate	1	grassland	Dahaizi	1	1	3
2013-2014	invertebrate	1	grassland	Dahaizi	1	1	3
2013-2014	invertebrate	1	grassland	Dahaizi	1	1	1
2013-2014	invertebrate	1	grassland	Dahaizi	1	1	1
2013-2014	invertebrate	1	grassland	Dahaizi	1	1	1
2013-2014	invertebrate	1	grassland	Dahaizi	1	1	1
2013-2014	invertebrate	1	grassland	Dahaizi	1	1	1
2013-2014	invertebrate	1	grassland	Dahaizi	1	1	1
2013-2014	invertebrate	1	grassland	Dahaizi	1	1	1
2013-2014	invertebrate	1	grassland	Dahaizi	1	1	1
2013-2014	invertebrate	1	grassland	Dahaizi	1	1	1
2013-2014	invertebrate	1	grassland	Dahaizi	1	1	1
2013-2014	invertebrate	1	grassland	Dahaizi	1	1	1
2013-2014	invertebrate	1	grassland	Dahaizi	2	1	1
2013-2014	invertebrate	1	grassland	Dahaizi	2	1	1
2013-2014	invertebrate	1	grassland	Dahaizi	2	1	1
2013-2014	invertebrate	1	grassland	Dahaizi	2	1	1
2013-2014	invertebrate	1	grassland	Dahaizi	2	1	1
2013-2014	invertebrate	1	grassland	Dahaizi	2	1	1
2013-2014	invertebrate	1	grassland	Dahaizi	2	1	1
2013-2014	invertebrate	1	grassland	Dahaizi	2	1	1
2013-2014	invertebrate	1	grassland	Dahaizi	2	1	1
2013-2014	invertebrate	1	grassland	Dahaizi	2	1	1
2013-2014	invertebrate	1	grassland	Dahaizi	2	1	4
2013-2014	invertebrate	1	grassland	Dahaizi	2	1	1
2013-2014	invertebrate	1	grassland	Dahaizi	3
2013-2014	invertebrate	2	grassland	Dahaizi	1	1	2
2013-2014	invertebrate	2	grassland	Dahaizi	1	1	3
2013-2014	invertebrate	2	grassland	Dahaizi	1	1	3
2013-2014	invertebrate	2	grassland	Dahaizi	2	1	4
2013-2014	invertebrate	2	grassland	Dahaizi	2	1	3
2013-2014	invertebrate	2	grassland	Dahaizi	2	1	4
2013-2014	invertebrate	2	grassland	Dahaizi	3	1	2
2013-2014	invertebrate	2	grassland	Dahaizi	3	1	2
2013-2014	invertebrate	2	grassland	Dahaizi	3	1	4
2013-2014	invertebrate	2	grassland	Dahaizi	3	1	4
2013-2014	invertebrate	2	grassland	Dahaizi	3	1	3
2013-2014	invertebrate	2	grassland	Dahaizi	3	1	3
2013-2014	invertebrate	2	grassland	Dahaizi	3	1	3
2013-2014	invertebrate	2	grassland	Dahaizi	3	1	4
2013-2014	invertebrate	2	grassland	Dahaizi	3	1	2
2013-2014	invertebrate	2	grassland	Dahaizi	3	1	2
2013-2014	invertebrate	2	grassland	Dahaizi	3	1	2
2013-2014	invertebrate	2	grassland	Dahaizi	3	1	2
2013-2014	invertebrate	2	grassland	Dahaizi	3	1	1
2013-2014	invertebrate	2	grassland	Dahaizi	3	1	2
2013-2014	invertebrate	2	grassland	Dahaizi	1	1	1
2013-2014	invertebrate	2	grassland	Dahaizi	1	1	2
2013-2014	invertebrate	2	grassland	Dahaizi	1	1	3
2013-2014	invertebrate	2	grassland	Dahaizi	1	1	3
2013-2014	invertebrate	2	grassland	Dahaizi	1	1	3
2013-2014	invertebrate	2	grassland	Dahaizi	1	1	3
2013-2014	invertebrate	2	grassland	Dahaizi	1	1	3
2013-2014	invertebrate	2	grassland	Dahaizi	1	1	3
2013-2014	invertebrate	2	grassland	Dahaizi	1	1	4
2013-2014	invertebrate	2	grassland	Dahaizi	2	1	2
2013-2014	invertebrate	2	grassland	Dahaizi	2	1	2
2013-2014	invertebrate	2	grassland	Dahaizi	2	1	2
2013-2014	invertebrate	2	grassland	Dahaizi	2	1	2
2013-2014	invertebrate	2	grassland	Dahaizi	2	1	2
2013-2014	invertebrate	2	grassland	Dahaizi	2	1	2
2013-2014	invertebrate	2	grassland	Dahaizi	2	1	2
2013-2014	invertebrate	2	grassland	Dahaizi	2	1	2
2013-2014	invertebrate	2	grassland	Dahaizi	3	1	3
2013-2014	invertebrate	2	grassland	Dahaizi	3	1	3
2013-2014	invertebrate	2	grassland	Dahaizi	3	1	4
2013-2014	invertebrate	11	grassland	Tiaodunhe	1	1	3
2013-2014	invertebrate	11	grassland	Tiaodunhe	1	1	3
2013-2014	invertebrate	11	grassland	Tiaodunhe	1	1	3
2013-2014	invertebrate	11	grassland	Tiaodunhe	1	1	4
2013-2014	invertebrate	11	grassland	Tiaodunhe	2
2013-2014	invertebrate	11	grassland	Tiaodunhe	3
2013-2014	invertebrate	11	grassland	Tiaodunhe	1	1	4
2013-2014	invertebrate	11	grassland	Tiaodunhe	2
2013-2014	invertebrate	11	grassland	Tiaodunhe	3	1	6
2013-2014	invertebrate	12	grassland	Tiaodunhe	1	1	1
2013-2014	invertebrate	12	grassland	Tiaodunhe	1	1	1
2013-2014	invertebrate	12	grassland	Tiaodunhe	1	1	1
2013-2014	invertebrate	12	grassland	Tiaodunhe	2
2013-2014	invertebrate	12	grassland	Tiaodunhe	3	1	1
2013-2014	invertebrate	1	grassland	Tiaodunhe	1
2013-2014	invertebrate	1	grassland	Tiaodunhe	2
2013-2014	invertebrate	1	grassland	Tiaodunhe	3
2013-2014	invertebrate	2	grassland	Tiaodunhe	1	1	4
2013-2014	invertebrate	2	grassland	Tiaodunhe	2
2013-2014	invertebrate	2	grassland	Tiaodunhe	3	1	2
2013-2014	invertebrate	2	grassland	Tiaodunhe	3	1	4
2013-2014	invertebrate	3	grassland	Tiaodunhe	3
2013-2014	invertebrate	11	grassland	Tiaodunhe	1	1	1
2013-2014	invertebrate	11	grassland	Tiaodunhe	1	1	1
2013-2014	invertebrate	11	grassland	Tiaodunhe	1	1	1
2013-2014	invertebrate	11	grassland	Tiaodunhe	1	1	1
2013-2014	invertebrate	11	grassland	Tiaodunhe	1	1	1
2013-2014	invertebrate	11	grassland	Tiaodunhe	1	1	1
2013-2014	invertebrate	11	grassland	Tiaodunhe	1	1	1
2013-2014	invertebrate	11	grassland	Tiaodunhe	1	1	1
2013-2014	invertebrate	11	grassland	Tiaodunhe	1	1	1
2013-2014	invertebrate	11	grassland	Tiaodunhe	1	1	1
2013-2014	invertebrate	11	grassland	Tiaodunhe	1	1	1
2013-2014	invertebrate	11	grassland	Tiaodunhe	1	1	1
2013-2014	invertebrate	11	grassland	Tiaodunhe	1	1	1
2013-2014	invertebrate	11	grassland	Tiaodunhe	1	1	1
2013-2014	invertebrate	11	grassland	Tiaodunhe	1	1	1
2013-2014	invertebrate	11	grassland	Tiaodunhe	1	1	1
2013-2014	invertebrate	11	grassland	Tiaodunhe	1	1	2
2013-2014	invertebrate	11	grassland	Tiaodunhe	1	1	2
2013-2014	invertebrate	11	grassland	Tiaodunhe	1	1	2
2013-2014	invertebrate	11	grassland	Tiaodunhe	1	1	2
2013-2014	invertebrate	11	grassland	Tiaodunhe	1	1	2
2013-2014	invertebrate	11	grassland	Tiaodunhe	1	1	2
2013-2014	invertebrate	11	grassland	Tiaodunhe	1	1	3
2013-2014	invertebrate	11	grassland	Tiaodunhe	1	1	3
2013-2014	invertebrate	11	grassland	Tiaodunhe	1	1	3
2013-2014	invertebrate	11	grassland	Tiaodunhe	1	1	3
2013-2014	invertebrate	11	grassland	Tiaodunhe	1	1	3
2013-2014	invertebrate	11	grassland	Tiaodunhe	1	1	3
2013-2014	invertebrate	11	grassland	Tiaodunhe	1	1	3
2013-2014	invertebrate	11	grassland	Tiaodunhe	1	1	3
2013-2014	invertebrate	11	grassland	Tiaodunhe	1	1	4
2013-2014	invertebrate	11	grassland	Tiaodunhe	1	1	6
2013-2014	invertebrate	11	grassland	Tiaodunhe	2	1	1
2013-2014	invertebrate	11	grassland	Tiaodunhe	2	1	1
2013-2014	invertebrate	11	grassland	Tiaodunhe	2	1	1
2013-2014	invertebrate	11	grassland	Tiaodunhe	2	1	1
2013-2014	invertebrate	11	grassland	Tiaodunhe	2	1	1
2013-2014	invertebrate	11	grassland	Tiaodunhe	2	1	1
2013-2014	invertebrate	11	grassland	Tiaodunhe	2	1	1
2013-2014	invertebrate	11	grassland	Tiaodunhe	2	1	1
2013-2014	invertebrate	11	grassland	Tiaodunhe	2	1	1
2013-2014	invertebrate	11	grassland	Tiaodunhe	2	1	1
2013-2014	invertebrate	11	grassland	Tiaodunhe	2	1	1
2013-2014	invertebrate	11	grassland	Tiaodunhe	2	1	1
2013-2014	invertebrate	11	grassland	Tiaodunhe	2	1	1
2013-2014	invertebrate	11	grassland	Tiaodunhe	2	1	1
2013-2014	invertebrate	11	grassland	Tiaodunhe	2	1	2
2013-2014	invertebrate	11	grassland	Tiaodunhe	2	1	2
2013-2014	invertebrate	11	grassland	Tiaodunhe	2	1	2
2013-2014	invertebrate	11	grassland	Tiaodunhe	3	1	1
2013-2014	invertebrate	11	grassland	Tiaodunhe	3	1	1
2013-2014	invertebrate	11	grassland	Tiaodunhe	3	1	1
2013-2014	invertebrate	11	grassland	Tiaodunhe	3	1	1
2013-2014	invertebrate	11	grassland	Tiaodunhe	3	1	1
2013-2014	invertebrate	11	grassland	Tiaodunhe	3	1	1
2013-2014	invertebrate	11	grassland	Tiaodunhe	3	1	1
2013-2014	invertebrate	11	grassland	Tiaodunhe	3	1	1
2013-2014	invertebrate	11	grassland	Tiaodunhe	3	1	1
2013-2014	invertebrate	11	grassland	Tiaodunhe	3	1	1
2013-2014	invertebrate	11	grassland	Tiaodunhe	3	1	1
2013-2014	invertebrate	11	grassland	Tiaodunhe	3	1	1
2013-2014	invertebrate	11	grassland	Tiaodunhe	3	1	2
2013-2014	invertebrate	11	grassland	Tiaodunhe	3	1	2
2013-2014	invertebrate	11	grassland	Tiaodunhe	3	1	2
2013-2014	invertebrate	11	grassland	Tiaodunhe	3	1	5
2013-2014	invertebrate	11	grassland	Tiaodunhe	3	1	5
2013-2014	invertebrate	12	grassland	Tiaodunhe	1	1	1
2013-2014	invertebrate	12	grassland	Tiaodunhe	1	1	1
2013-2014	invertebrate	12	grassland	Tiaodunhe	1	1	1
2013-2014	invertebrate	12	grassland	Tiaodunhe	1	1	1
2013-2014	invertebrate	12	grassland	Tiaodunhe	1	1	1
2013-2014	invertebrate	12	grassland	Tiaodunhe	1	1	4
2013-2014	invertebrate	12	grassland	Tiaodunhe	2	1	2
2013-2014	invertebrate	12	grassland	Tiaodunhe	2	1	2
2013-2014	invertebrate	12	grassland	Tiaodunhe	2	1	3
2013-2014	invertebrate	12	grassland	Tiaodunhe	3	1	1
2013-2014	invertebrate	12	grassland	Tiaodunhe	3	1	1
2013-2014	invertebrate	12	grassland	Tiaodunhe	3	1	1
2013-2014	invertebrate	12	grassland	Tiaodunhe	3	1	1
2013-2014	invertebrate	12	grassland	Tiaodunhe	3	1	1
2013-2014	invertebrate	12	grassland	Tiaodunhe	3	1	1
2013-2014	invertebrate	12	grassland	Tiaodunhe	3	1	1
2013-2014	invertebrate	12	grassland	Tiaodunhe	3	1	2
2013-2014	invertebrate	1	grassland	Tiaodunhe	1	1	5
2013-2014	invertebrate	1	grassland	Tiaodunhe	1	1	5
2013-2014	invertebrate	1	grassland	Tiaodunhe	1	1	5
2013-2014	invertebrate	1	grassland	Tiaodunhe	1	1	5
2013-2014	invertebrate	1	grassland	Tiaodunhe	1	1	6
2013-2014	invertebrate	1	grassland	Tiaodunhe	1	1	6
2013-2014	invertebrate	1	grassland	Tiaodunhe	1	1	4
2013-2014	invertebrate	1	grassland	Tiaodunhe	1	1	4
2013-2014	invertebrate	1	grassland	Tiaodunhe	1	1	4
2013-2014	invertebrate	1	grassland	Tiaodunhe	1	1	4
2013-2014	invertebrate	1	grassland	Tiaodunhe	1	1	4
2013-2014	invertebrate	1	grassland	Tiaodunhe	1	1	4
2013-2014	invertebrate	1	grassland	Tiaodunhe	2	1	4
2013-2014	invertebrate	1	grassland	Tiaodunhe	2	1	4
2013-2014	invertebrate	1	grassland	Tiaodunhe	2	1	4
2013-2014	invertebrate	1	grassland	Tiaodunhe	2	1	4
2013-2014	invertebrate	1	grassland	Tiaodunhe	2	1	4
2013-2014	invertebrate	1	grassland	Tiaodunhe	2	1	4
2013-2014	invertebrate	1	grassland	Tiaodunhe	2	1	10
2013-2014	invertebrate	1	grassland	Tiaodunhe	3	1	1
2013-2014	invertebrate	1	grassland	Tiaodunhe	3	1	1
2013-2014	invertebrate	1	grassland	Tiaodunhe	3	1	1
2013-2014	invertebrate	1	grassland	Tiaodunhe	3	1	4
2013-2014	invertebrate	1	grassland	Tiaodunhe	3	1	4
2013-2014	invertebrate	1	grassland	Tiaodunhe	3	1	5
2013-2014	invertebrate	1	grassland	Tiaodunhe	3	1	10
2013-2014	invertebrate	2	grassland	Tiaodunhe	1	1	3
2013-2014	invertebrate	2	grassland	Tiaodunhe	1	1	2
2013-2014	invertebrate	2	grassland	Tiaodunhe	1	1	3
2013-2014	invertebrate	2	grassland	Tiaodunhe	1	1	4
2013-2014	invertebrate	2	grassland	Tiaodunhe	1	1	3
2013-2014	invertebrate	2	grassland	Tiaodunhe	1	1	4
2013-2014	invertebrate	2	grassland	Tiaodunhe	1	1	2
2013-2014	invertebrate	2	grassland	Tiaodunhe	1	1	3
2013-2014	invertebrate	2	grassland	Tiaodunhe	1	1	4
2013-2014	invertebrate	2	grassland	Tiaodunhe	1	1	4
2013-2014	invertebrate	2	grassland	Tiaodunhe	1	1	4
2013-2014	invertebrate	2	grassland	Tiaodunhe	1	1	3
2013-2014	invertebrate	2	grassland	Tiaodunhe	2	1	2
2013-2014	invertebrate	2	grassland	Tiaodunhe	2	1	3
2013-2014	invertebrate	2	grassland	Tiaodunhe	2	1	3
2013-2014	invertebrate	2	grassland	Tiaodunhe	2	1	1
2013-2014	invertebrate	2	grassland	Tiaodunhe	2	1	1
2013-2014	invertebrate	2	grassland	Tiaodunhe	2	1	1
2013-2014	invertebrate	2	grassland	Tiaodunhe	2	1	1
2013-2014	invertebrate	2	grassland	Tiaodunhe	2	1	1
2013-2014	invertebrate	2	grassland	Tiaodunhe	3	1	1
2013-2014	invertebrate	2	grassland	Tiaodunhe	3	1	2
2013-2014	invertebrate	2	grassland	Tiaodunhe	3	1	1
2013-2014	invertebrate	2	grassland	Tiaodunhe	3	1	4
2013-2014	invertebrate	2	grassland	Tiaodunhe	3	1	1
2013-2014	invertebrate	2	grassland	Tiaodunhe	3	1	1
2013-2014	invertebrate	2	grassland	Tiaodunhe	3	1	1
2013-2014	invertebrate	2	grassland	Tiaodunhe	3	1	1
2013-2014	invertebrate	2	grassland	Tiaodunhe	4	1	1
2013-2014	invertebrate	2	grassland	Tiaodunhe	4	1	1
2013-2014	invertebrate	2	grassland	Tiaodunhe	4	1	1
2013-2014	invertebrate	2	grassland	Tiaodunhe	4	1	1
2013-2014	invertebrate	2	grassland	Tiaodunhe	4	1	1
2013-2014	invertebrate	2	grassland	Tiaodunhe	4	1	2
2013-2014	invertebrate	2	grassland	Tiaodunhe	4	1	1
2013-2014	invertebrate	2	grassland	Tiaodunhe	4	1	1
2013-2014	invertebrate	2	grassland	Tiaodunhe	4	1	1
2013-2014	invertebrate	2	grassland	Tiaodunhe	4	1	1
2013-2014	invertebrate	2	grassland	Tiaodunhe	4	1	1
2013-2014	invertebrate	2	grassland	Tiaodunhe	4	1	2
2013-2014	invertebrate	2	grassland	Tiaodunhe	4	1	1
2013-2014	invertebrate	2	grassland	Tiaodunhe	4	1	1
2013-2014	invertebrate	2	grassland	Tiaodunhe	4	1	1
2013-2014	invertebrate	2	grassland	Tiaodunhe	4	1	1
2013-2014	invertebrate	2	grassland	Tiaodunhe	4	1	1
2013-2014	invertebrate	2	grassland	Tiaodunhe	4	1	1
2013-2014	invertebrate	2	grassland	Tiaodunhe	4	1	1
2013-2014	invertebrate	2	grassland	Tiaodunhe	4	1	1
