# Supplementary material for: Winter diet and food selection of the Black-necked Crane Grus nigricollis in Dashanbao, Yunnan, China
Source: PeerJ. 2016 Apr 21;4:e1968. doi: 10.7717/peerj.1968 (PMC4846803; doi:10.7717/peerj.1968)
Supplement: Data S3 [file peerj-04-1968-s014.xlsx]

## Sheet: Sheet1
日期时间（date)	空气温度(temperature ℃）
2013-11-01	4.3
2013-11-01	3.3
2013-11-01	3.2
2013-11-01	2.3
2013-11-01	2.1
2013-11-01	1.3
2013-11-01	1.3
2013-11-01	1.5
2013-11-01	1.8
2013-11-01	2.1
2013-11-01	2.4
2013-11-01	2.2
2013-11-01	2.9
2013-11-01	2.2
2013-11-01	2.6
2013-11-01	4.9
2013-11-01	6.6
2013-11-01	5.2
2013-11-01	4.2
2013-11-01	2.8
2013-11-01	2.3
2013-11-01	2.2
2013-11-01	2.1
2013-11-01	1.5
2013-11-02	1.5
2013-11-02	1.1
2013-11-02	1.7
2013-11-02	1.4
2013-11-02	1.6
2013-11-02	0.5
2013-11-02	1.1
2013-11-02	1.1
2013-11-02	1.2
2013-11-02	2.1
2013-11-02	3.2
2013-11-02	4.1
2013-11-02	4.9
2013-11-02	7.6
2013-11-02	8
2013-11-02	8.5
2013-11-02	8.7
2013-11-02	8.3
2013-11-02	6.3
2013-11-02	3.9
2013-11-02	4.1
2013-11-02	3.3
2013-11-02	1.6
2013-11-02	1.3
2013-11-03	1.1
2013-11-03	1.7
2013-11-03	2.6
2013-11-03	2.6
2013-11-03	2.4
2013-11-03	2.3
2013-11-03	2
2013-11-03	1.8
2013-11-03	1.9
2013-11-03	2
2013-11-03	2.4
2013-11-03	3.1
2013-11-03	3.1
2013-11-03	4.4
2013-11-03	4.2
2013-11-03	4.9
2013-11-03	5.1
2013-11-03	5.1
2013-11-03	4.2
2013-11-03	3.9
2013-11-03	3
2013-11-03	3.2
2013-11-03	3.1
2013-11-03	3
2013-11-04	3.1
2013-11-04	3.6
2013-11-04	3.6
2013-11-04	3.4
2013-11-04	3.3
2013-11-04	3.2
2013-11-04	3
2013-11-04	2.9
2013-11-04	3
2013-11-04	3.2
2013-11-04	4.9
2013-11-04	6.6
2013-11-04	7.6
2013-11-04	9
2013-11-04	9.2
2013-11-04	9.8
2013-11-04	9.5
2013-11-04	8.8
2013-11-04	7.2
2013-11-04	5.9
2013-11-04	5.4
2013-11-04	5.4
2013-11-04	5.1
2013-11-04	5
2013-11-05	4.7
2013-11-05	4.5
2013-11-05	4.2
2013-11-05	3.9
2013-11-05	3.6
2013-11-05	3.3
2013-11-05	3.5
2013-11-05	2.9
2013-11-05	3
2013-11-09	13.7
2013-11-09	13.3
2013-11-09	11.1
2013-11-09	8.3
2013-11-09	7.5
2013-11-09	6.6
2013-11-09	6.5
2013-11-09	5.7
2013-11-10	5.5
2013-11-10	6.5
2013-11-10	5.7
2013-11-10	6.3
2013-11-10	3.3
2013-11-10	4
2013-11-10	5
2013-11-10	4
2013-11-10	4.1
2013-11-10	2.3
2013-11-10	8.3
2013-11-10	6.4
2013-11-10	7.9
2013-11-10	9.9
2013-11-10	11.2
2013-11-10	13.1
2013-11-10	12.8
2013-11-10	12.1
2013-11-10	9.9
2013-11-10	7
2013-11-10	6.4
2013-11-10	6.7
2013-11-10	6.1
2013-11-10	5.4
2013-11-11	6.1
2013-11-11	5.9
2013-11-11	6.5
2013-11-11	5.5
2013-11-11	5.9
2013-11-11	4.6
2013-11-11	4.5
2013-11-11	4.1
2013-11-11	4.8
2013-11-11	7.7
2013-11-11	10.2
2013-11-11	11.3
2013-11-11	10.5
2013-11-11	11.6
2013-11-11	11.5
2013-11-11	10.1
2013-11-11	10.5
2013-11-11	9.9
2013-11-11	8.4
2013-11-11	8.5
2013-11-11	7.1
2013-11-11	7.6
2013-11-11	7.5
2013-11-11	6.8
2013-11-12	6.5
2013-11-12	6
2013-11-12	5.8
2013-11-12	5.8
2013-11-12	5.5
2013-11-12	5.2
2013-11-12	5.3
2013-11-12	4.8
2013-11-12	5.1
2013-11-12	6.8
2013-11-12	8.2
2013-11-12	9.4
2013-11-12	9.9
2013-11-12	10.7
2013-11-12	11.1
2013-11-12	11.3
2013-11-12	11.1
2013-11-12	10.3
2013-11-12	8.4
2013-11-12	7
2013-11-12	7
2013-11-12	7.7
2013-11-12	7.4
2013-11-12	7.3
2013-11-13	6.6
2013-11-13	6.1
2013-11-13	5.5
2013-11-13	4.8
2013-11-13	4.5
2013-11-13	4.1
2013-11-13	3.7
2013-11-13	3.1
2013-11-13	3.4
2013-11-13	5.6
2013-11-13	6.7
2013-11-13	8.1
2013-11-13	9.3
2013-11-13	10
2013-11-13	10.5
2013-11-13	10.7
2013-11-13	10.4
2013-11-13	9.8
2013-11-13	7.8
2013-11-13	6.6
2013-11-13	6.1
2013-11-13	4.7
2013-11-13	2.5
2013-11-13	1.8
2013-11-14	-1.2
2013-11-14	-1.6
2013-11-14	-1.8
2013-11-14	-2
2013-11-14	-1.9
2013-11-14	-2
2013-11-14	-2
2013-11-14	-1.9
2013-11-14	-1.9
2013-11-14	-1.5
2013-11-14	-1.3
2013-11-14	-0.7
2013-11-14	0.2
2013-11-14	0.2
2013-11-14	1.2
2013-11-14	0.4
2013-11-14	1.2
2013-11-14	1.9
2013-11-14	0.7
2013-11-14	0.6
2013-11-14	0.5
2013-11-14	0.3
2013-11-14	0.6
2013-11-14	1
2013-11-15	1.4
2013-11-15	1.5
2013-11-15	0.7
2013-11-15	1
2013-11-15	1.2
2013-11-15	1
2013-11-15	0.9
2013-11-15	0.8
2013-11-15	1.6
2013-11-15	3.3
2013-11-15	4.7
2013-11-15	6
2013-11-15	7.2
2013-11-15	8.7
2013-11-15	8.7
2013-11-15	9.8
2013-11-15	9.9
2013-11-15	9.5
2013-11-15	6.9
2013-11-15	5.2
2013-11-15	5.4
2013-11-15	4.9
2013-11-15	4.8
2013-11-15	4.3
2013-11-16	2.4
2013-11-16	-0.1
2013-11-16	0.6
2013-11-16	-0.5
2013-11-16	-1
2013-11-16	-0.7
2013-11-16	-1.2
2013-11-16	-1.1
2013-11-16	-0.4
2013-11-16	-0.2
2013-11-16	1.5
2013-11-16	1.6
2013-11-16	3.9
2013-11-16	3.3
2013-11-16	3.6
2013-11-16	3.7
2013-11-16	2.8
2013-11-16	2.1
2013-11-16	1.5
2013-11-16	1
2013-11-16	1.5
2013-11-16	1.5
2013-11-16	1.6
2013-11-17	1.3
2013-11-17	1.4
2013-11-17	1.5
2013-11-17	1.5
2013-11-17	1.7
2013-11-17	2.4
2013-11-17	2.4
2013-11-17	2.4
2013-11-17	2.1
2013-11-17	3
2013-11-17	5.2
2013-11-17	6.4
2013-11-17	8
2013-11-17	8.7
2013-11-17	9.8
2013-11-17	10
2013-11-17	10.1
2013-11-17	7.6
2013-11-17	5.7
2013-11-17	4.1
2013-11-17	3.5
2013-11-17	3.4
2013-11-17	3
2013-11-17	2.7
2013-11-18	1.8
2013-11-18	1
2013-11-18	0.4
2013-11-18	-0.1
2013-11-18	-0.1
2013-11-18	-0.2
2013-11-18	-0.2
2013-11-18	-0.1
2013-11-18	0
2013-11-18	0.1
2013-11-18	0.9
2013-11-18	1.2
2013-11-18	1.2
2013-11-18	1.5
2013-11-18	2.5
2013-11-18	2.1
2013-11-18	1.6
2013-11-18	2.1
2013-11-18	1.2
2013-11-18	1.1
2013-11-18	1
2013-11-18	1.1
2013-11-18	1
2013-11-18	1
2013-11-19	1.1
2013-11-19	1
2013-11-19	1.1
2013-11-19	0.9
2013-11-19	0.8
2013-11-19	0.3
2013-11-19	0.5
2013-11-19	0.7
2013-11-19	1
2013-11-19	1.2
2013-11-19	1.9
2013-11-19	2.8
2013-11-19	3.2
2013-11-19	4.3
2013-11-19	5.5
2013-11-19	6.5
2013-11-19	7.1
2013-11-19	3.6
2013-11-19	3
2013-11-19	2.9
2013-11-19	2.5
2013-11-19	2.2
2013-11-19	2
2013-11-19	1.2
2013-11-20	1.7
2013-11-20	2.3
2013-11-20	2.6
2013-11-20	2.4
2013-11-20	2.3
2013-11-20	2.3
2013-11-20	2.3
2013-11-20	1.9
2013-11-20	2.1
2013-11-20	2.6
2013-11-20	4.8
2013-11-20	5.3
2013-11-20	4.9
2013-11-20	6.5
2013-11-20	7.3
2013-11-20	8.1
2013-11-20	8.3
2013-11-20	8.3
2013-11-20	5
2013-11-20	3.1
2013-11-20	2.5
2013-11-20	2.7
2013-11-20	2.6
2013-11-20	2.9
2013-11-21	1.2
2013-11-21	2
2013-11-21	1.9
2013-11-21	1.9
2013-11-21	1.9
2013-11-21	1.4
2013-11-21	1.3
2013-11-21	1.1
2013-11-21	1.5
2013-11-21	2.8
2013-11-21	4.5
2013-11-21	5.1
2013-11-21	5.9
2013-11-21	5.7
2013-11-21	5.1
2013-11-21	5.2
2013-11-21	5.7
2013-11-21	3.4
2013-11-21	2.1
2013-11-21	1.1
2013-11-21	0.5
2013-11-21	0.5
2013-11-21	1
2013-11-22	1.1
2013-11-22	1.6
2013-11-22	0.8
2013-11-22	0.2
2013-11-22	0.3
2013-11-22	-0.9
2013-11-22	-0.5
2013-11-22	-1.4
2013-11-22	-1.2
2013-11-22	1.4
2013-11-22	2.7
2013-11-22	5.3
2013-11-22	6.1
2013-11-22	6.7
2013-11-22	7.3
2013-11-22	7.8
2013-11-22	7.4
2013-11-22	6.5
2013-11-22	4.2
2013-11-22	1.5
2013-11-22	0
2013-11-22	0.5
2013-11-22	-0.9
2013-11-22	-0.2
2013-11-23	0.3
2013-11-23	-1.8
2013-11-23	-1.1
2013-11-23	-2
2013-11-23	-1.6
2013-11-23	-2.3
2013-11-23	-2.9
2013-11-23	-2.7
2013-11-23	-2
2013-11-23	0.8
2013-11-23	2.3
2013-11-23	4.2
2013-11-23	7
2013-11-23	7.9
2013-11-23	8.2
2013-11-23	7.8
2013-11-23	7.1
2013-11-23	4.2
2013-11-23	2.1
2013-11-23	1.3
2013-11-23	0.3
2013-11-23	1.6
2013-11-23	-0.2
2013-11-24	-0.4
2013-11-24	-1
2013-11-24	-2.6
2013-11-24	-4
2013-11-24	-5.6
2013-11-24	-6
2013-11-24	-5.6
2013-11-24	-6.2
2013-11-24	-6
2013-11-24	-4.9
2013-11-24	-3
2013-11-24	-0.1
2013-11-24	1.9
2013-11-24	4.8
2013-11-24	7.2
2013-11-24	6.3
2013-11-24	4.7
2013-11-24	3.4
2013-11-24	2.2
2013-11-24	-0.3
2013-11-24	0.1
2013-11-24	0.3
2013-11-24	2
2013-11-25	2.4
2013-11-25	2.4
2013-11-25	2.2
2013-11-25	2.9
2013-11-25	2.3
2013-11-25	2.4
2013-11-25	2.7
2013-11-25	2.6
2013-11-25	2.1
2013-11-25	4.1
2013-11-25	6.8
2013-11-25	6.9
2013-11-25	8.7
2013-11-25	9.6
2013-11-25	10.1
2013-11-25	10.4
2013-11-25	9.2
2013-11-25	8.2
2013-11-25	5.4
2013-11-25	3.2
2013-11-25	2.8
2013-11-25	2.6
2013-11-25	1.9
2013-11-25	0.7
2013-11-26	1.1
2013-11-26	0.2
2013-11-26	0.1
2013-11-26	-0.8
2013-11-26	0.7
2013-11-26	1.8
2013-11-26	2.3
2013-11-26	2.9
2013-11-26	2.3
2013-11-26	5
2013-11-26	7.9
2013-11-26	9.7
2013-11-26	9.3
2013-11-26	9.1
2013-11-26	9.9
2013-11-26	9.5
2013-11-26	8
2013-11-26	3.2
2013-11-26	1.9
2013-11-26	3.8
2013-11-26	-1.1
2013-11-26	-2
2013-11-27	-4
2013-11-27	-4.3
2013-11-27	-4.8
2013-11-27	-4.4
2013-11-27	-4.5
2013-11-27	-4.4
2013-11-27	-4.3
2013-11-27	-4.2
2013-11-27	-4.2
2013-11-27	-4
2013-11-27	-3.6
2013-11-27	-4
2013-11-27	-4.3
2013-11-27	-4.5
2013-11-27	-3.1
2013-11-27	-3.4
2013-11-27	-3.6
2013-11-27	-3.9
2013-11-27	-4.5
2013-11-27	-4.8
2013-11-27	-5
2013-11-27	-5
2013-11-27	-5.2
2013-11-27	-5.9
2013-11-28	-6.2
2013-11-28	-5.8
2013-11-28	-4.6
2013-11-28	-4.4
2013-11-28	-3.2
2013-11-28	-4.2
2013-11-28	-3.1
2013-11-28	-3.4
2013-11-28	-3.2
2013-11-28	-3.6
2013-11-28	-4.8
2013-11-28	-5
2013-11-28	-5.1
2013-11-28	-5.2
2013-11-28	-5.3
2013-11-28	-5.4
2013-11-28	-5.4
2013-11-28	-5.4
2013-11-29	-5.3
2013-11-29	-4.9
2013-11-29	-4.2
2013-11-29	-4.2
2013-11-29	-4.3
2013-11-29	-3.9
2013-11-29	-3.7
2013-11-29	-2.8
2013-11-29	-2.3
2013-11-29	-1.9
2013-11-29	-0.9
2013-11-29	-0.1
2013-11-29	0
2013-11-29	0.3
2013-11-29	0.3
2013-11-29	0.5
2013-11-29	0
2013-11-29	-0.1
2013-11-29	0
2013-11-29	-0.1
2013-11-29	-0.4
2013-11-29	-1.9
2013-11-29	-1.8
2013-11-29	-1.5
2013-11-30	-1.4
2013-11-30	-1.5
2013-11-30	-2
2013-11-30	-2.3
2013-11-30	-2.8
2013-11-30	-1.9
2013-11-30	-2.2
2013-11-30	-2.6
2013-11-30	-2.5
2013-11-30	-2.7
2013-11-30	-2
2013-11-30	-0.6
2013-11-30	-0.5
2013-11-30	-1.3
2013-11-30	-1.8
2013-11-30	-1.8
2013-11-30	-2.3
2013-11-30	-3.5
2013-11-30	-2.9
2013-12-01	-3.1
2013-12-01	-4.1
2013-12-01	-2.5
2013-12-01	-2.6
2013-12-01	-3.1
2013-12-01	-3.3
2013-12-01	-4.5
2013-12-01	-3.8
2013-12-01	-3.5
2013-12-01	-1.3
2013-12-01	1.2
2013-12-01	2.9
2013-12-01	4.2
2013-12-01	5.6
2013-12-01	6.3
2013-12-01	4.7
2013-12-01	4.2
2013-12-01	5
2013-12-01	2.3
2013-12-01	0.4
2013-12-01	0.2
2013-12-01	0.6
2013-12-01	0.4
2013-12-02	0.3
2013-12-02	0.6
2013-12-02	-0.6
2013-12-02	0.2
2013-12-02	0.2
2013-12-02	-0.1
2013-12-02	0.3
2013-12-02	0.6
2013-12-02	0.7
2013-12-02	1.7
2013-12-02	2.7
2013-12-02	3.9
2013-12-02	4.9
2013-12-02	6.1
2013-12-02	6.5
2013-12-02	7.4
2013-12-02	7.6
2013-12-02	5.9
2013-12-02	5.9
2013-12-02	3.7
2013-12-02	3.7
2013-12-02	1.8
2013-12-02	1
2013-12-02	0.4
2013-12-02	0.6
2013-12-02	0
2013-12-03	-0.6
2013-12-03	-1
2013-12-03	-0.5
2013-12-03	-0.5
2013-12-03	-1
2013-12-03	0.3
2013-12-03	0.6
2013-12-03	-0.1
2013-12-03	0
2013-12-03	2.4
2013-12-03	5.2
2013-12-03	7
2013-12-03	8.2
2013-12-03	7.3
2013-12-03	7.3
2013-12-03	5.8
2013-12-03	7.4
2013-12-03	6.7
2013-12-03	4.7
2013-12-03	1.7
2013-12-03	1.6
2013-12-03	2.6
2013-12-03	2.5
2013-12-03	2.6
2013-12-04	2.2
2013-12-04	1.7
2013-12-04	1.7
2013-12-04	0.7
2013-12-04	-0.3
2013-12-04	2.2
2013-12-04	3
2013-12-04	2
2013-12-04	3.4
2013-12-04	3.9
2013-12-04	6.9
2013-12-04	7.6
2013-12-05	-3.3
2013-12-05	-2.9
2013-12-05	-1.4
2013-12-05	-0.5
2013-12-05	-0.1
2013-12-05	-0.4
2013-12-05	-0.6
2013-12-05	-0.9
2013-12-05	-1.1
2013-12-05	-1.2
2013-12-05	-1.2
2013-12-05	-1.2
2013-12-05	-1.2
2013-12-05	-1.3
2013-12-05	-1
2013-12-06	-1.4
2013-12-06	-0.7
2013-12-06	-0.4
2013-12-06	-0.2
2013-12-06	-0.4
2013-12-06	-0.5
2013-12-06	-0.6
2013-12-06	-0.8
2013-12-06	0
2013-12-06	0.1
2013-12-06	1.3
2013-12-06	2.4
2013-12-06	3.7
2013-12-06	4.9
2013-12-06	4.9
2013-12-06	5.4
2013-12-06	5.6
2013-12-06	5.4
2013-12-06	3.3
2013-12-06	1.7
2013-12-06	-0.1
2013-12-06	-0.6
2013-12-06	-0.8
2013-12-06	-0.5
2013-12-07	-0.7
2013-12-07	-1.3
2013-12-07	-1.1
2013-12-07	0.1
2013-12-07	0.4
2013-12-07	-0.3
2013-12-07	0.5
2013-12-07	-0.4
2013-12-07	-0.9
2013-12-07	3
2013-12-07	3.9
2013-12-07	6.2
2013-12-07	7.8
2013-12-07	8.3
2013-12-07	9.4
2013-12-07	9.5
2013-12-07	9.7
2013-12-07	8.2
2013-12-07	3.9
2013-12-07	2.8
2013-12-07	2
2013-12-07	1.2
2013-12-07	1.1
2013-12-07	1.9
2013-12-08	2.4
2013-12-08	2.2
2013-12-08	2.1
2013-12-08	2.6
2013-12-08	1.9
2013-12-08	1.4
2013-12-08	1
2013-12-08	0.8
2013-12-08	1
2013-12-08	2.9
2013-12-08	4.8
2013-12-08	6.6
2013-12-08	7.2
2013-12-08	8.8
2013-12-08	8.9
2013-12-08	8.9
2013-12-08	8.8
2013-12-08	8.1
2013-12-08	6.2
2013-12-08	4.2
2013-12-08	2.7
2013-12-08	2.3
2013-12-08	-2.4
2013-12-08	-3.4
2013-12-09	-3.4
2013-12-09	-3.3
2013-12-09	-3.4
2013-12-09	-3.5
2013-12-09	-3.6
2013-12-09	-3.7
2013-12-09	-3.6
2013-12-09	-3.6
2013-12-09	-3.4
2013-12-09	-3.4
2013-12-09	-3.4
2013-12-09	-2.9
2013-12-09	-2.6
2013-12-09	-1.9
2013-12-09	-2.1
2013-12-09	1
2013-12-09	1.4
2013-12-09	1.1
2013-12-09	-0.3
2013-12-09	-0.5
2013-12-09	-0.1
2013-12-09	0
2013-12-09	0.6
2013-12-09	0.7
2013-12-10	0.6
2013-12-10	0.5
2013-12-10	0.5
2013-12-10	0.6
2013-12-10	0.6
2013-12-10	1
2013-12-10	0.9
2013-12-10	0.9
2013-12-10	0.8
2013-12-10	1.8
2013-12-10	2.5
2013-12-10	3.9
2013-12-10	5.2
2013-12-10	6.2
2013-12-10	7.5
2013-12-10	8
2013-12-10	6.8
2013-12-10	5.8
2013-12-10	-0.9
2013-12-10	-3.4
2013-12-10	-4.9
2013-12-10	-5.7
2013-12-10	-6.3
2013-12-10	-7.5
2013-12-11	-7.7
2013-12-11	-8.1
2013-12-11	-8.2
2013-12-11	-7.2
2013-12-11	-7
2013-12-11	-6.7
2013-12-11	-6.6
2013-12-11	-6.4
2013-12-11	-5.8
2013-12-11	-5.2
2013-12-11	-1.1
2013-12-11	-0.2
2013-12-11	0.4
2013-12-11	0.7
2013-12-11	3.3
2013-12-11	2.5
2013-12-11	1.2
2013-12-11	0.3
2013-12-11	0.3
2013-12-11	0.3
2013-12-11	0.5
2013-12-11	0.6
2013-12-12	-0.2
2013-12-12	-0.8
2013-12-12	-1
2013-12-12	-1.4
2013-12-12	-1.6
2013-12-12	-1.7
2013-12-12	-1.7
2013-12-12	-1.8
2013-12-12	-2.1
2013-12-12	-0.4
2013-12-12	1.2
2013-12-12	2.3
2013-12-12	2.3
2013-12-12	4
2013-12-12	4.3
2013-12-12	5.4
2013-12-12	5.5
2013-12-12	4.6
2013-12-12	0.8
2013-12-12	0.4
2013-12-12	-0.6
2013-12-12	-1.4
2013-12-12	-1.2
2013-12-12	-6
2013-12-13	-6.3
2013-12-13	-5.8
2013-12-13	-5.6
2013-12-13	-5.7
2013-12-13	-5.6
2013-12-13	-5.9
2013-12-13	-5.8
2013-12-13	-3.9
2013-12-13	-3.8
2013-12-13	-2.6
2013-12-13	-0.8
2013-12-13	0.6
2013-12-13	2.3
2013-12-13	3
2013-12-13	3.6
2013-12-13	4.1
2013-11-03	5.1
2013-11-03	5.1
2013-11-03	4.2
2013-11-03	3.9
2013-11-03	3
2013-11-03	3.2
2013-11-03	3.1
2013-11-03	3
2013-11-04	3.1
2013-11-04	3.6
2013-11-04	3.6
2013-11-04	3.4
2013-11-04	3.3
2013-11-04	3.2
2013-11-04	3
2013-11-04	2.9
2013-11-04	3
2013-12-13	-3.8
2013-12-14	-5.1
2013-12-14	-4.9
2013-12-14	-3.9
2013-12-14	-3.3
2013-12-14	-2.1
2013-12-14	-1.3
2013-12-14	-0.1
2013-12-14	-0.4
2013-12-14	-3.1
2013-12-14	-4.5
2013-12-14	-3.4
2013-12-14	-3.1
2013-12-14	-4.5
2013-12-14	-5.2
2013-12-14	-6.1
2013-12-15	-6.4
2013-12-15	-6.9
2013-12-15	-7.3
2013-12-15	-7.2
2013-12-15	-7.5
2013-12-15	-7.4
2013-12-15	-7.7
2013-12-15	-7.9
2013-12-15	-7.9
2013-12-15	-7.9
2013-12-15	-7.8
2013-12-15	-7.5
2013-12-15	-7.2
2013-12-15	-7.5
2013-12-15	-7.9
2013-12-15	-8.1
2013-12-15	-8.7
2013-12-15	-9.3
2013-12-15	-9.8
2013-12-15	-10.3
2013-12-15	-10.6
2013-12-15	-10.6
2013-12-15	-11
2013-12-15	-10.9
2013-12-16	-10.4
2013-12-16	-10.1
2013-12-16	-10.2
2013-12-16	-10.5
2013-12-16	-10
2013-12-16	-10.2
2013-12-16	-10.2
2013-12-16	-9.9
2013-12-16	-9.5
2013-12-16	-9.6
2013-12-16	-9.2
2013-12-16	-8.5
2013-12-16	-6.2
2013-12-16	-5.6
2013-12-16	-5.4
2013-12-16	-5.3
2013-12-16	-5.3
2013-12-16	-6.3
2013-12-16	-7.5
2013-12-16	-9
2013-12-16	-10.7
2013-12-16	-11.4
2013-12-16	-11.9
2013-12-16	-13
2013-12-17	-12.6
2013-12-17	-12.9
2013-12-17	-11.3
2013-12-17	-10.8
2013-12-17	-10.8
2013-12-17	-9.6
2013-12-17	-10.8
2013-12-17	-11.5
2013-12-17	-11.9
2013-12-17	-7.4
2013-12-17	-2.8
2013-12-17	-1.4
2013-12-17	0.3
2013-12-17	-1
2013-12-17	-1.1
2013-12-17	-2.2
2013-12-17	-2.5
2013-12-17	-3.8
2013-12-17	-5.4
2013-12-17	-6.7
2013-12-17	-6.9
2013-12-17	-7.4
2013-12-17	-7
2013-12-17	-7.3
2013-12-18	-8.1
2013-12-18	-8
2013-12-18	-7.4
2013-12-18	-6.7
2013-12-18	-7.1
2013-12-18	-7.2
2013-12-18	-7
2013-12-18	-7
2013-12-18	-8.4
2013-12-18	-5.1
2013-12-18	-3.1
2013-12-18	-2.9
2013-12-18	-2.9
2013-12-18	-2.8
2013-12-18	-2.9
2013-12-18	-2.7
2013-12-18	-3.2
2013-12-18	-3.9
2013-12-18	-5.1
2013-12-18	-5.7
2013-12-18	-6.4
2013-12-18	-6.6
2013-12-18	-7.6
2013-12-18	-8.4
2013-12-19	-8.3
2013-12-19	-6.5
2013-12-19	-7.9
2013-12-19	-8.3
2013-12-19	-7.1
2013-12-19	-6.8
2013-12-19	-7.1
2013-12-19	-6.5
2013-12-19	-6.5
2013-12-19	-2.3
2013-12-19	-2.1
2013-12-19	-1.6
2013-12-19	0.2
2013-12-19	-0.1
2013-12-19	-0.7
2013-12-19	-1
2013-12-19	-2.7
2013-12-19	-4.2
2013-12-19	-5.7
2013-12-19	-5.6
2013-12-19	-6
2013-12-19	-5.3
2013-12-19	-4.6
2013-12-20	-4.5
2013-12-20	-4.8
2013-12-20	-6.2
2013-12-20	-6.3
2013-12-20	-6.6
2013-12-20	-5.8
2013-12-20	-6
2013-12-20	-6.3
2013-12-20	-6.2
2013-12-20	-5.4
2013-12-20	-5.8
2013-12-20	-5.9
2013-12-20	-4.1
2013-12-20	-4.3
2013-12-20	-4.7
2013-12-20	-4.7
2013-12-20	-5.5
2013-12-20	-5.8
2013-12-20	-6.5
2013-12-20	-6.7
2013-12-20	-7.8
2013-12-20	-8.2
2013-12-20	-8.9
2013-12-20	-9.1
2013-12-21	-9.6
2013-12-21	-9.8
2013-12-21	-10.3
2013-12-21	-10.4
2013-12-21	-10.5
2013-12-21	-10.6
2013-12-21	-10.5
2013-12-21	-10.6
2013-12-21	-10.7
2013-12-21	-10.3
2013-12-21	-9.3
2013-12-21	-8.4
2013-12-21	-8
2013-12-21	-6.7
2013-12-21	-5
2013-12-21	-5.5
2013-12-21	-5.2
2013-12-21	-5.5
2013-12-21	-6
2013-12-21	-5.8
2013-12-21	-6.1
2013-12-21	-5.5
2013-12-21	-5.2
2013-12-21	-7.7
2013-12-22	-7.3
2013-12-22	-5.8
2013-12-22	-5.7
2013-12-22	-5.1
2013-12-22	-4.5
2013-12-22	-4.3
2013-12-22	-4.1
2013-12-22	-4.1
2013-12-22	-4.1
2013-12-22	-3.8
2013-12-22	-3.8
2013-12-22	-3.6
2013-12-22	-3.3
2013-12-22	-2.7
2013-12-22	-2.3
2013-12-22	-2.4
2013-12-22	-2.1
2013-12-22	-1.6
2013-12-22	-3.4
2013-12-22	-3.8
2013-12-22	-5.4
2013-12-22	-5.3
2013-12-22	-5.9
2013-12-22	-5.3
2013-12-23	-5.3
2013-12-23	-6.9
2013-12-23	-7.7
2013-12-23	-7.8
2013-12-23	-8.5
2013-12-23	-8.4
2013-12-23	-8.1
2013-12-23	-8.2
2013-12-23	-8.1
2013-12-23	-7
2013-12-23	-5.6
2013-12-23	-4.3
2013-12-23	-3.7
2013-12-23	-3
2013-12-23	-2.4
2013-12-23	-2.5
2013-12-23	-2.7
2013-12-23	-4.6
2013-12-23	-5.5
2013-12-23	-5.8
2013-12-23	-4.9
2013-12-23	-6.1
2013-12-23	-6.8
2013-12-24	-5.7
2013-12-24	-5.4
2013-12-24	-5.2
2013-12-24	-5.6
2013-12-24	-5.5
2013-12-24	-5.2
2013-12-24	-5
2013-12-24	-5.2
2013-12-24	-5.2
2013-12-24	-4.9
2013-12-24	-4.5
2013-12-24	-4.1
2013-12-24	-4
2013-12-24	-3.8
2013-12-24	-3.4
2013-12-24	-3.1
2013-12-24	-3.3
2013-12-24	-4.1
2013-12-24	-4.9
2013-12-24	-4.8
2013-12-24	-4.7
2013-12-24	-4.6
2013-12-24	-4.6
2013-12-24	-4.4
2013-12-25	-4.7
2013-12-25	-4.9
2013-12-25	-4.8
2013-12-25	-4.7
2013-12-25	-4.7
2013-12-25	-4.9
2013-12-25	-4
2013-12-25	-3.9
2013-12-25	-3.8
2013-12-25	-3.1
2013-12-25	-2.7
2013-12-25	-2.2
2013-12-25	-1.6
2013-12-25	-1.2
2013-12-25	-0.3
2013-12-25	-0.2
2013-12-25	-0.2
2013-12-25	-1.5
2013-12-25	-2.5
2013-12-25	-3.3
2013-12-25	-6.3
2013-12-25	-7.7
2013-12-25	-7.9
2013-12-25	-8.1
2013-12-26	-8.2
2013-12-26	-8.2
2013-12-26	-8.5
2013-12-26	-8.6
2013-12-26	-8.5
2013-12-26	-8.5
2013-12-26	-8.4
2013-12-26	-8.4
2013-12-26	-8.5
2013-12-26	-8.4
2013-12-26	-8.2
2013-12-26	-8
2013-12-26	-8
2013-12-26	-8
2013-12-26	-8
2013-12-26	-8.2
2013-12-26	-8.5
2014-01-06	0.8
2014-01-06	3.5
2014-01-06	4.7
2014-01-06	5.5
2014-01-06	5.8
2014-01-06	5.5
2014-01-06	4.4
2014-01-06	3.1
2014-01-06	2.8
2014-01-06	2.3
2014-01-06	1.5
2014-01-06	1.1
2014-01-07	0.5
2014-01-07	-0.5
2014-01-07	-0.9
2014-01-07	-1.4
2014-01-07	-2.4
2014-01-07	-2.8
2014-01-07	-2.8
2014-01-07	-2.9
2014-01-07	-3.4
2014-01-07	-3
2014-01-07	-1.6
2014-01-07	-0.3
2014-01-07	1.5
2014-01-07	2.3
2014-01-07	3.2
2014-01-07	4.2
2014-01-07	3.9
2014-01-07	3.2
2014-01-07	1.6
2014-01-07	-0.4
2014-01-07	-1
2014-01-07	-6.3
2014-01-07	-6.9
2014-01-07	-7
2014-01-08	-7.2
2014-01-08	-7.2
2014-01-08	-7.2
2014-01-08	-7.3
2014-01-08	-7.5
2014-01-08	-7.6
2014-01-08	-7.6
2014-01-08	-7.5
2014-01-08	-7.4
2014-01-08	-7.3
2014-01-08	-7.1
2014-01-08	-7.1
2014-01-08	-5.9
2014-01-08	-5.8
2014-01-08	-6.4
2014-01-08	-4.3
2014-01-08	-1.4
2014-01-08	0.2
2014-01-08	-0.4
2014-01-08	-2
2014-01-08	-2.2
2014-01-08	-7.8
2014-01-08	-7.4
2014-01-08	-6.8
2014-01-09	-9
2014-01-09	-9
2014-01-09	-9.1
2014-01-09	-9.2
2014-01-09	-5.5
2014-01-09	-5.3
2014-01-09	-4.7
2014-01-09	-3.6
2014-01-09	-2.8
2014-01-09	-1.5
2014-01-09	0.6
2014-01-09	3.7
2014-01-09	5.4
2014-01-09	5.5
2014-01-09	6.9
2014-01-09	6.8
2014-01-09	5.3
2014-01-09	4
2014-01-09	2.9
2014-01-09	1.4
2014-01-09	1.2
2014-01-09	1.2
2014-01-09	1.2
2014-01-09	1.4
2014-01-10	0.7
2014-01-10	0.3
2014-01-10	-0.5
2014-01-10	-0.8
2014-01-10	-1.2
2014-01-10	-1.5
2014-01-10	-1.6
2014-01-10	-1.2
2014-01-10	-1.1
2014-01-10	-0.2
2014-01-10	1
2014-01-10	2.7
2014-01-10	3.1
2014-01-10	4.6
2014-01-10	5.4
2014-01-10	5.6
2014-01-10	5.8
2014-01-10	5.4
2014-01-10	4.2
2014-01-10	3.4
2014-01-10	3
2014-01-10	2.4
2014-01-10	2.4
2014-01-10	1.6
2014-01-11	0.7
2014-01-11	0.3
2014-01-11	0
2014-01-11	-0.9
2014-01-11	-1.3
2014-01-11	-2.3
2014-01-11	-2.2
2014-01-11	-2.6
2014-01-11	-2.5
2014-01-11	-1.9
2014-01-11	-0.4
2014-01-11	0.9
2014-01-11	1.7
2014-01-11	2.7
2014-01-11	3.6
2014-01-11	4.1
2014-01-11	4.2
2014-01-11	3.7
2014-01-11	1.8
2014-01-11	1.2
2014-01-11	1.5
2014-01-11	-6.9
2014-01-11	-8.7
2014-01-11	-9.3
2014-01-12	-9.4
2014-01-12	-9.3
2014-01-12	-9.5
2014-01-12	-9.6
2014-01-12	-9.8
2014-01-12	-9.9
2014-01-12	-9.9
2014-01-12	-9.9
2014-01-12	-9.7
2014-01-12	-9.6
2014-01-12	-9.2
2014-01-12	-8.7
2014-01-12	-7.2
2014-01-12	-6.5
2014-01-12	-2.5
2014-01-12	-2.3
2014-01-12	-0.4
2014-01-12	-7.5
2014-01-12	-8.3
2014-01-12	-8.8
2014-01-12	-9
2014-01-12	-9.8
2014-01-12	-10.2
2014-01-12	-10.2
2014-01-13	-10.6
2014-01-13	-10.7
2014-01-13	-10.7
2014-01-13	-10.8
2014-01-13	-10.4
2014-01-13	-10
2014-01-13	-8.5
2014-01-13	-8
2014-01-13	-9.4
2014-01-13	-9
2014-01-13	-4.5
2014-01-13	-2.8
2014-01-13	-0.4
2014-01-13	-0.8
2014-01-13	-0.1
2014-01-13	1.5
2014-01-13	1.1
2014-01-13	-0.1
2014-01-13	-4.8
2014-01-13	-5.7
2014-01-13	-5.3
2014-01-13	-5.4
2014-01-13	-3
2014-01-14	-2
2014-01-14	-1.8
2014-01-14	-2.2
2014-01-14	-1.7
2014-01-14	-1.9
2014-01-14	-2
2014-01-14	-2.3
2014-01-14	-2.6
2014-01-14	-1.7
2014-01-14	-0.1
2014-01-14	2.2
2014-01-14	4.3
2014-01-14	4.8
2014-01-14	3.7
2014-01-14	4.7
2014-01-14	4.3
2014-01-14	3
2014-01-14	1.5
2014-01-14	-0.8
2014-01-15	-3.3
2014-01-15	-3.3
2014-01-15	-3.5
2014-01-15	-2.4
2014-01-15	0.1
2014-01-15	1.5
2014-01-15	3
2014-01-15	3.2
2014-01-15	4.1
2014-01-15	4.1
2014-01-15	4.6
2014-01-15	3.1
2014-01-15	-0.5
2014-01-15	-1
2014-01-15	0.1
2014-01-15	0.6
2014-01-15	0.7
2014-01-16	0.3
2014-01-16	-0.7
2014-01-16	-0.9
2014-01-16	-1.9
2014-01-16	-2.3
2014-01-16	-2.5
2014-01-16	-2.5
2014-01-16	-3
2014-01-16	-3.3
2014-01-16	-3.6
2014-01-16	-3.6
2014-01-16	-2.8
2014-01-16	1
2014-01-16	3.1
2014-01-16	3.9
2014-01-16	4.3
2014-01-16	4.6
2014-01-16	2.8
2014-01-16	1.7
2014-01-16	-5.2
2014-01-16	-5.4
2014-01-16	-6.1
2014-01-16	-6.5
2014-01-17	-6.6
2014-01-17	-6.9
2014-01-17	-6.3
2014-01-17	-5.8
2014-01-17	-5.3
2014-01-17	-5
2014-01-17	-5
2014-01-17	-4.1
2014-01-17	-4.3
2014-01-17	-4
2014-01-17	-2.4
2014-01-17	0.2
2014-01-17	1.6
2014-01-17	3.2
2014-01-17	2.9
2014-01-17	3.7
2014-01-17	3.4
2014-01-17	2.6
2014-01-17	0.8
2014-01-17	-1.6
2014-01-17	-1.8
2014-01-17	-2.2
2014-01-17	-2.1
2014-01-17	-1.1
2014-01-18	-1.4
2014-01-18	-0.6
2014-01-18	-0.9
2014-01-18	-2
2014-01-18	-0.8
2014-01-18	-0.2
2014-01-18	-0.2
2014-01-18	-0.5
2014-01-18	2.4
2014-01-18	3.6
2014-01-18	6.3
2014-01-18	6.7
2014-01-18	7.6
2014-01-18	7.3
2014-01-18	7.1
2014-01-18	6.6
2014-01-18	4.6
2014-01-18	1.7
2014-01-18	1.1
2014-01-18	1.9
2014-01-18	2.7
2014-01-18	2.9
2014-01-19	2.1
2014-01-19	2.7
2014-01-19	2.4
2014-01-19	1.8
2014-01-19	2.3
2014-01-19	2.1
2014-01-19	2.3
2014-01-19	1.7
2014-01-19	1.6
2014-01-19	1.8
2014-01-19	3.5
2014-01-19	5.6
2014-01-19	3.6
2014-01-19	0.9
2014-01-19	-1.3
2014-01-19	-4.3
2014-01-19	-5.1
2014-01-19	-5.8
2014-01-19	-6.4
2014-01-19	-6.7
2014-01-19	-7.2
2014-01-19	-7.3
2014-01-19	-7.5
2014-01-19	-7.8
2014-01-20	-7.8
2014-01-20	-8.1
2014-01-20	-8.8
2014-01-20	-8.7
2014-01-20	-8.7
2014-01-20	-8.7
2014-01-20	-9.6
2014-01-20	-10.3
2014-01-20	-10.4
2014-01-20	-9.9
2014-01-20	-9.5
2014-01-20	-9.2
2014-01-20	-8.5
2014-01-20	-7.6
2014-01-20	-6.7
2014-01-20	-6.3
2014-01-20	-6.4
2014-01-20	-6.4
2014-01-20	-7.8
2014-01-20	-8.2
2014-01-20	-9.8
2014-01-20	-10.7
2014-01-20	-9.7
2014-01-20	-8.2
2014-01-21	-8.8
2014-01-21	-8.7
2014-01-21	-8.7
2014-01-21	-7.5
2014-01-21	-8.2
2014-01-21	-9
2014-01-21	-8.3
2014-01-21	-9.3
2014-01-21	-7.4
2014-01-21	-4.7
2014-01-21	-1.5
2014-01-21	0.3
2014-01-21	1
2014-01-21	1.4
2014-01-21	2.9
2014-01-21	4.1
2014-01-21	3.3
2014-01-21	3.1
2014-01-21	-3.1
2014-01-21	-3.5
2014-01-21	-2
2014-01-21	-3.1
2014-01-21	-4
2014-01-22	-4.6
2014-01-22	-4.2
2014-01-22	-1.8
2014-01-22	-0.7
2014-01-22	-1.7
2014-01-22	-1.9
2014-01-22	-1.5
2014-01-22	-0.8
2014-01-22	-0.3
2014-01-22	0.6
2014-01-22	4.4
2014-01-22	5.8
2014-01-22	6.8
2014-01-22	8.4
2014-01-22	9.6
2014-01-22	10.2
2014-01-22	8
2014-01-22	7.6
2014-01-22	7.4
2014-01-22	2
2014-01-22	0.1
2014-01-22	1.7
2014-01-22	1.9
2014-01-22	-0.1
2014-01-23	-0.6
2014-01-23	2.6
2014-01-23	3.7
2014-01-23	3.7
2014-01-23	3.7
2014-01-23	3.3
2014-01-23	2.8
2014-01-23	3.2
2014-01-23	2.7
2014-01-23	4.8
2014-01-23	8.8
2014-01-23	10.2
2014-01-23	11.4
2014-01-23	10
2014-01-23	11.6
2014-01-23	11.8
2014-01-23	10.9
2014-01-23	8.7
2014-01-23	7.3
2014-01-23	7.7
2014-01-23	7.5
2014-01-23	8.1
2014-01-23	7.9
2014-01-24	7.9
2014-01-24	7.2
2014-01-24	7.1
2014-01-24	6.1
2014-01-24	6.6
2014-01-24	6
2014-01-24	6
2014-01-24	5.3
2014-01-24	5.7
2014-01-24	7.1
2014-01-24	8.4
2014-01-24	10.1
2014-01-24	11.6
2014-01-24	12.3
2014-01-24	12.7
2014-01-24	13.2
2014-01-24	13.1
2014-01-24	12.6
2014-01-24	10.6
2014-01-24	6.7
2014-01-24	4.6
2014-01-24	1.7
2014-01-24	1.2
2014-01-24	-0.3
2014-01-25	-2.5
2014-01-25	-3.7
2014-01-25	-3.7
2014-01-25	-3.7
2014-01-25	-3.5
2014-01-25	-3.5
2014-01-25	-3.8
2014-01-25	-3.9
2014-01-25	-5.8
2014-01-25	-3.8
2014-01-25	-2.6
2014-01-25	-1.3
2014-01-25	0.7
2014-01-25	2.9
2014-01-25	4.3
2014-01-25	5.4
2014-01-25	5.3
2014-01-25	5.5
2014-01-25	4.9
2014-01-25	3.2
2014-01-25	2.3
2014-01-25	-0.1
2014-01-25	-1.2
2014-01-25	-1.6
2014-01-26	-2.3
2014-01-26	-2.3
2014-01-26	-2.5
2014-01-26	-3.4
2014-01-26	-3.5
2014-01-26	-3.4
2014-01-26	-3.2
2014-01-26	-3.9
2014-01-26	-4.1
2014-01-26	-4.2
2014-01-26	-3.8
2014-01-26	-2.3
2014-01-26	-1.4
2014-01-26	-0.6
2014-01-26	2.3
2014-01-26	5.1
2014-01-26	6.8
2014-01-26	7
2014-01-26	5.3
2014-01-26	2.6
2014-01-26	2.5
2014-01-26	1.7
2014-01-26	2.3
2014-01-26	2.5
2014-01-27	2
2014-01-27	2.4
2014-01-27	3.2
2014-01-27	3.5
2014-01-27	3.6
2014-01-27	4
2014-01-27	2.5
2014-01-27	2.2
2014-01-27	2.9
2014-01-27	3.4
2014-01-27	5.1
2014-01-27	6.1
2014-01-27	7.2
2014-01-27	8.5
2014-01-27	9.1
2014-01-27	9
2014-01-27	9.7
2014-01-27	9.6
2014-01-27	8.1
2014-01-27	4.5
2014-01-27	5.2
2014-01-27	5.2
2014-01-27	4.9
2014-01-27	4.8
2014-01-28	4
2014-01-28	2.5
2014-01-28	2.7
2014-01-28	-1.1
2014-01-28	0.5
2014-01-28	0.2
2014-01-28	-0.6
2014-01-28	-1.7
2014-01-28	-2.7
2014-01-28	0.2
2014-01-28	-3.4
2014-01-28	-2.9
2014-01-28	-2.1
2014-01-28	0.6
2014-01-28	6.2
2014-01-28	6.5
2014-01-28	2.8
2014-01-28	4.3
2014-01-28	3.9
2014-01-28	2.3
2014-01-28	1.6
2014-01-28	1.3
2014-01-28	-2.8
2014-01-28	-3
2014-01-29	-3.7
2014-01-29	-3.9
2014-01-29	0
2014-01-29	-5
2014-01-29	-6.3
2014-01-29	-5.3
2014-01-29	-1.3
2014-01-29	-1.3
2014-01-29	-0.4
2014-01-29	-0.4
2014-01-29	0.8
2014-01-29	3
2014-01-29	5
2014-01-29	6
2014-01-29	7
2014-01-29	6.2
2014-01-29	6.3
2014-01-29	7
2014-01-29	7.4
2014-01-29	6.1
2014-01-29	1.3
2014-01-29	2.5
2014-01-29	3.2
2014-01-29	1.9
2014-01-29	2
2014-01-30	2.8
2014-01-30	3.4
2014-01-30	3.9
2014-01-30	4.3
2014-01-30	3.8
2014-01-30	3.3
2014-01-30	3.2
2014-01-30	2.8
2014-01-30	2.9
2014-01-30	4.5
2014-01-30	7.4
2014-01-30	7.9
2014-01-30	10.2
2014-01-30	10.4
2014-01-30	12.2
2014-01-30	11.4
2014-01-30	10.5
2014-01-30	8.3
2014-01-30	5.9
2014-01-30	5.3
2014-01-30	4.9
2014-01-30	5.3
2014-01-30	5.5
2014-01-31	4.7
2014-01-31	4.5
2014-01-31	5
2014-01-31	5.2
2014-01-31	4.6
2014-01-31	4.6
2014-01-31	3.9
2014-01-31	3.4
2014-01-31	2.7
2014-01-31	3.9
2014-01-31	5.6
2014-01-31	6.8
2014-01-31	7.7
2014-01-31	8.7
2014-01-31	9.3
2014-01-31	9.9
2014-01-31	9.9
2014-01-31	9.7
2014-01-31	8.9
2014-01-31	6.5
2014-01-31	5.7
2014-01-31	6
2014-01-31	6.1
2014-02-01	6
2014-02-01	5.9
2014-02-01	5.3
2014-02-01	4.8
2014-02-01	4.8
2014-02-01	4.5
2014-02-01	4
2014-02-01	2.8
2014-02-01	3.2
2014-02-01	4.9
2014-02-01	6.2
2014-02-01	7.7
2014-02-01	9
2014-02-01	10.2
2014-02-01	11.4
2014-02-01	11.7
2014-02-01	11.8
2014-02-01	11.2
2014-02-01	9.8
2014-02-01	7.3
2014-02-01	6.2
2014-02-01	6.5
2014-02-01	6.3
2014-02-01	6.5
2014-02-02	6.4
2014-02-02	6.1
2014-02-02	5.2
2014-02-02	5
2014-02-02	3.7
2014-02-02	2.7
2014-02-02	2
2014-02-02	1.7
2014-02-02	0.9
2014-02-02	4.7
2014-02-02	7.9
2014-02-02	9.1
2014-02-02	10.9
2014-02-02	12.7
2014-02-02	12
2014-02-02	12
2014-02-02	12
2014-02-02	11.4
2014-02-02	11.6
2014-02-02	5.6
2014-02-02	1.9
2014-02-02	1
2014-02-02	3.2
2014-02-02	3.5
2014-02-03	1.6
2014-02-03	5.2
2014-02-03	4.7
2014-02-03	5
2014-02-03	5.3
2014-02-03	5.3
2014-02-03	3.9
2014-02-03	4.1
2014-02-03	3.8
2014-02-03	6.3
2014-02-03	10.6
2014-02-03	12.6
2014-02-03	12.6
2014-02-03	13.4
2014-02-03	12.4
2014-02-03	12.3
2014-02-03	12
2014-02-03	12.4
2014-02-03	10.8
2014-02-03	7.2
2014-02-03	6.9
2014-02-03	5.5
2014-02-03	4.6
2014-02-03	3.7
2014-02-04	4.1
2014-02-04	4.3
2014-02-04	4.9
2014-02-04	4.5
2014-02-04	3.5
2014-02-04	2.5
2014-02-04	2.1
2014-02-04	1.7
2014-02-04	1.1
2014-02-04	3.5
2014-02-04	6.3
2014-02-04	7.5
2014-02-04	8
2014-02-04	9
2014-02-04	10.5
2014-02-04	11.5
2014-02-04	11.3
2014-02-04	11.1
2014-02-04	10.2
2014-02-04	8.7
2014-02-04	8.5
2014-02-04	7.8
2014-02-04	7
2014-02-04	6.8
2014-02-05	6.1
2014-02-05	5.8
2014-02-05	5.1
2014-02-05	4.7
2014-02-05	4.2
2014-02-05	4.3
2014-02-05	3.7
2014-02-05	3
2014-02-05	3.1
2014-02-05	4.3
2014-02-05	5.9
2014-02-05	6.9
2014-02-05	8.1
2014-02-05	9.5
2014-02-05	10.1
2014-02-05	11
2014-02-05	10.8
2014-02-05	10.4
2014-02-05	8.6
2014-02-05	6.8
2014-02-05	6.9
2014-02-05	6.8
2014-02-05	6.2
2014-02-05	5.4
2014-02-06	4.9
2014-02-06	4.6
2014-02-06	4.4
2014-02-06	3.9
2014-02-06	3.7
2014-02-06	3
2014-02-06	2.5
2014-02-06	2.3
2014-02-06	1.8
2014-02-06	2.3
2014-02-06	3.4
2014-02-06	5
2014-02-06	5.7
2014-02-06	6.8
2014-02-06	8.3
2014-02-06	9
2014-02-06	8.4
2014-02-06	8.1
2014-02-06	7.6
2014-02-06	5.7
2014-02-06	5.2
2014-02-06	5
2014-02-06	5
2014-02-06	3.9
2014-02-07	3.2
2014-02-07	2.3
2014-02-07	2.1
2014-02-07	1.5
2014-02-07	0.9
2014-02-07	0.1
2014-02-07	0
2014-02-07	-0.6
2014-02-07	0
2014-02-07	1.9
2014-02-07	4.8
2014-02-07	6.6
2014-02-07	8.5
2014-02-07	9.3
2014-02-07	10.4
2014-02-07	10.7
2014-02-07	10.3
2014-02-07	9.1
2014-02-07	7.3
2014-02-07	4.7
2014-02-07	4.4
2014-02-07	4.3
2014-02-07	4
2014-02-07	4.1
2014-02-08	3.4
2014-02-08	2.6
2014-02-08	2.1
2014-02-08	1.5
2014-02-08	1.9
2014-02-08	1.7
2014-02-08	1.3
2014-02-08	0.5
2014-02-08	0.5
2014-02-08	0.5
2014-02-08	1.6
2014-02-08	2.5
2014-02-08	3.4
2014-02-08	4.9
2014-02-08	5.3
2014-02-08	6.6
2014-02-08	7.1
2014-02-08	7.1
2014-02-08	7.2
2014-02-08	5.5
2014-02-08	3.8
2014-02-08	3.9
2014-02-08	3
2014-02-08	2.2
2014-02-08	1.8
2014-02-09	1.3
2014-02-09	0.5
2014-02-09	0
2014-02-09	-0.9
2014-02-09	-1.9
2014-02-09	-2.1
2014-02-09	-2.2
2014-02-09	-2.3
2014-02-09	-3.1
2014-02-09	-4.5
2014-02-09	-6.2
2014-02-09	-7.3
2014-02-09	-5.8
2014-02-09	-2.8
2014-02-09	-1
2014-02-09	0.8
2014-02-09	-0.7
2014-02-09	-4.1
2014-02-09	-5.9
[truncated: 2,725 more rows]
