# Supplementary material for: Winter diet and food selection of the Black-necked Crane Grus nigricollis in Dashanbao, Yunnan, China
Source: PeerJ. 2016 Apr 21;4:e1968. doi: 10.7717/peerj.1968 (PMC4846803; doi:10.7717/peerj.1968)
Supplement: Data S4 [file peerj-04-1968-s015.xlsx]

## Sheet: Sheet1
year	month	food type	frequency
2013-2014	11	invertebrate	15
2013-2014	11	invertebrate	10
2013-2014	11	invertebrate	9
2013-2014	11	invertebrate	38
2013-2014	11	invertebrate	21
2013-2014	11	invertebrate	7
2013-2014	11	invertebrate	18
2013-2014	11	invertebrate	12
2013-2014	11	invertebrate	14
2013-2014	11	invertebrate	8
2013-2014	11	invertebrate	12
2013-2014	11	invertebrate	39
2013-2014	11	invertebrate	14
2013-2014	11	invertebrate	32
2013-2014	11	invertebrate	14
2013-2014	11	invertebrate	33
2013-2014	11	invertebrate	13
2013-2014	11	invertebrate	11
2013-2014	11	invertebrate	14
2013-2014	11	invertebrate	8
2013-2014	11	invertebrate	12
2013-2014	11	invertebrate	64
2013-2014	11	invertebrate	8
2013-2014	11	invertebrate	25
2013-2014	11	invertebrate	0
2013-2014	11	invertebrate	11
2013-2014	12	invertebrate	20
2013-2014	12	invertebrate	0
2013-2014	12	invertebrate	0
2013-2014	12	invertebrate	1
2013-2014	12	invertebrate	2
2013-2014	12	invertebrate	2
2013-2014	12	invertebrate	1
2013-2014	1	invertebrate	4
2013-2014	1	invertebrate	0
2013-2014	1	invertebrate	9
2013-2014	1	invertebrate	0
2013-2014	1	invertebrate	0
2013-2014	1	invertebrate	0
2013-2014	1	invertebrate	0
2013-2014	1	invertebrate	3
2013-2014	1	invertebrate	0
2013-2014	1	invertebrate	6
2013-2014	1	invertebrate	8
2013-2014	1	invertebrate	3
2013-2014	2	invertebrate	5
2013-2014	2	invertebrate	1
2013-2014	2	invertebrate	5
2013-2014	2	invertebrate	11
2013-2014	2	invertebrate	6
2013-2014	2	invertebrate	13
2013-2014	2	invertebrate	19
2013-2014	2	invertebrate	17
2013-2014	2	invertebrate	21
2013-2014	2	invertebrate	11
2013-2014	2	invertebrate	5
2013-2014	2	invertebrate	4
2013-2014	2	invertebrate	1
2013-2014	2	invertebrate	9
2013-2014	11	leaves	3
2013-2014	11	leaves	2
2013-2014	11	leaves	5
2013-2014	12	leaves	5
2013-2014	12	leaves	2
2013-2014	12	leaves	2
2013-2014	12	leaves	4
2013-2014	12	leaves	1
2013-2014	1	leaves	19
2013-2014	1	leaves	1
2013-2014	1	leaves	33
2013-2014	1	leaves	40
2013-2014	1	leaves	13
2013-2014	2	leaves	9
2013-2014	2	leaves	1
2013-2014	2	leaves	3
2013-2014	11	herbaceous plants	1
2013-2014	12	herbaceous plants	1
2013-2014	12	herbaceous plants	1
2013-2014	1	herbaceous plants	2
2013-2014	2	herbaceous plants	2
2013-2014	2	herbaceous plants	3
2013-2014	12	tubers	1
2013-2014	12	tubers	2
2013-2014	12	tubers	1
2013-2014	1	tubers	3
2013-2014	1	tubers	4
2013-2014	1	tubers	8
2013-2014	1	tubers	2
2013-2014	1	tubers	1
2013-2014	1	tubers	10
2013-2014	1	tubers	3
2013-2014	1	tubers	10
2013-2014	1	tubers	7
2013-2014	1	tubers	10
2013-2014	1	tubers	7
2013-2014	1	tubers	6
2013-2014	1	tubers	4
2013-2014	1	tubers	3
2013-2014	1	tubers	4
2013-2014	1	tubers	6
2013-2014	2	tubers	1
2013-2014	2	tubers	1
2013-2014	2	tubers	2
2013-2014	2	tubers	2
2013-2014	1	bastard speedwell	1
2013-2014	1	bastard speedwell	1
2013-2014	11	potato	210
2013-2014	11	potato	10
2013-2014	11	potato	20
2013-2014	12	potato	10
2013-2014	12	potato	5
2013-2014	12	potato	5
2013-2014	12	potato	10
2013-2014	1	potato	0
2013-2014	1	potato	0
2013-2014	1	potato	0
2013-2014	1	potato	0
2013-2014	1	potato	0
2013-2014	1	potato	5
2013-2014	1	potato	20
2013-2014	1	potato	20
2013-2014	1	potato	20
2013-2014	1	potato	20
2013-2014	1	potato	5
2013-2014	1	potato	5
2013-2014	1	potato	10
2013-2014	2	potato	10
2013-2014	2	potato	10
2013-2014	2	potato	10
2013-2014	2	potato	20
2013-2014	2	potato	10
2014-2015	11	invertebrate	0
2014-2015	11	invertebrate	9
2014-2015	11	invertebrate	7
2014-2015	11	invertebrate	4
2014-2015	11	invertebrate	13
2014-2015	11	invertebrate	5
2014-2015	11	invertebrate	3
2014-2015	11	invertebrate	3
2014-2015	11	invertebrate	8
2014-2015	11	invertebrate	16
2014-2015	11	invertebrate	9
2014-2015	11	invertebrate	1
2014-2015	11	invertebrate	6
2014-2015	11	invertebrate	9
2014-2015	11	invertebrate	11
2014-2015	11	invertebrate	24
2014-2015	11	invertebrate	12
2014-2015	11	invertebrate	12
2014-2015	11	invertebrate	6
2014-2015	11	invertebrate	4
2014-2015	11	invertebrate	8
2014-2015	11	invertebrate	7
2014-2015	11	invertebrate	1
2014-2015	11	invertebrate	11
2014-2015	11	invertebrate	10
2014-2015	11	invertebrate	8
2014-2015	11	invertebrate	17
2014-2015	11	invertebrate	11
2014-2015	11	invertebrate	5
2014-2015	11	invertebrate	6
2014-2015	11	invertebrate	2
2014-2015	11	invertebrate	11
2014-2015	11	invertebrate	10
2014-2015	11	invertebrate	18
2014-2015	11	invertebrate	4
2014-2015	11	invertebrate	28
2014-2015	11	invertebrate	23
2014-2015	11	invertebrate	42
2014-2015	11	invertebrate	33
2014-2015	11	invertebrate	3
2014-2015	11	invertebrate	34
2014-2015	12	invertebrate	11
2014-2015	12	invertebrate	7
2014-2015	12	invertebrate	0
2014-2015	12	invertebrate	0
2014-2015	12	invertebrate	0
2014-2015	12	invertebrate	0
2014-2015	12	invertebrate	6
2014-2015	12	invertebrate	6
2014-2015	1	invertebrate	1
2014-2015	1	invertebrate	1
2014-2015	1	invertebrate	10
2014-2015	1	invertebrate	2
2014-2015	1	invertebrate	3
2014-2015	1	invertebrate	0
2014-2015	1	invertebrate	0
2014-2015	1	invertebrate	0
2014-2015	1	invertebrate	7
2014-2015	1	invertebrate	11
2014-2015	2	invertebrate	4
2014-2015	2	invertebrate	10
2014-2015	2	invertebrate	7
2014-2015	2	invertebrate	0
2014-2015	2	invertebrate	12
2014-2015	2	invertebrate	14
2014-2015	2	invertebrate	10
2014-2015	2	invertebrate	9
2014-2015	2	invertebrate	8
2014-2015	2	invertebrate	15
2014-2015	2	invertebrate	9
2014-2015	2	invertebrate	11
2014-2015	2	invertebrate	11
2014-2015	2	invertebrate	12
2014-2015	2	invertebrate	14
2014-2015	2	invertebrate	15
2014-2015	2	invertebrate	10
2014-2015	2	invertebrate	12
2014-2015	2	invertebrate	24
2014-2015	2	invertebrate	11
2014-2015	2	invertebrate	12
2014-2015	2	invertebrate	15
2014-2015	2	invertebrate	13
2014-2015	2	invertebrate	9
2014-2015	2	invertebrate	9
2014-2015	2	invertebrate	15
2014-2015	2	invertebrate	14
2014-2015	2	invertebrate	8
2014-2015	11	leaves	1
2014-2015	11	leaves	6
2014-2015	11	leaves	1
2014-2015	11	leaves	2
2014-2015	11	leaves	1
2014-2015	11	leaves	1
2014-2015	11	leaves	1
2014-2015	11	leaves	3
2014-2015	11	leaves	1
2014-2015	11	leaves	2
2014-2015	11	leaves	2
2014-2015	11	leaves	1
2014-2015	11	leaves	2
2014-2015	11	leaves	1
2014-2015	12	leaves	4
2014-2015	12	leaves	4
2014-2015	12	leaves	2
2014-2015	12	leaves	5
2014-2015	12	leaves	7
2014-2015	12	leaves	23
2014-2015	12	leaves	28
2014-2015	12	leaves	4
2014-2015	12	leaves	2
2014-2015	1	leaves	25
2014-2015	1	leaves	29
2014-2015	1	leaves	22
2014-2015	1	leaves	3
2014-2015	1	leaves	4
2014-2015	2	leaves	1
2014-2015	2	leaves	1
2014-2015	2	leaves	3
2014-2015	2	leaves	1
2014-2015	12	herbaceous plants	4
2014-2015	12	herbaceous plants	8
2014-2015	1	herbaceous plants	3
2014-2015	1	herbaceous plants	8
2014-2015	1	herbaceous plants	1
2014-2015	1	herbaceous plants	6
2014-2015	1	herbaceous plants	6
2014-2015	2	herbaceous plants	1
2014-2015	11	tubers	3
2014-2015	11	tubers	2
2014-2015	11	tubers	2
2014-2015	11	tubers	13
2014-2015	11	tubers	3
2014-2015	11	tubers	11
2014-2015	11	tubers	2
2014-2015	11	tubers	11
2014-2015	12	tubers	1
2014-2015	12	tubers	3
2014-2015	12	tubers	1
2014-2015	12	tubers	7
2014-2015	1	tubers	8
2014-2015	1	tubers	9
2014-2015	2	tubers	1
2014-2015	2	tubers	1
2014-2015	11	bastard speedwell	0
2014-2015	11	bastard speedwell	1
2014-2015	11	bastard speedwell	0
2014-2015	11	bastard speedwell	0
2014-2015	11	bastard speedwell	0
2014-2015	11	bastard speedwell	0
2014-2015	1	bastard speedwell	0
2014-2015	1	bastard speedwell	0
2014-2015	1	bastard speedwell	0
2014-2015	2	bastard speedwell	0
2014-2015	2	bastard speedwell	0
2014-2015	11	potato	0
2014-2015	11	potato	10
2014-2015	11	potato	0
2014-2015	11	potato	10
2014-2015	11	potato	20
2014-2015	11	potato	20
2014-2015	11	potato	10
2014-2015	11	potato	10
2014-2015	11	potato	0
2014-2015	11	potato	0
2014-2015	11	potato	10
2014-2015	11	potato	0
2014-2015	11	potato	20
2014-2015	11	potato	0
2014-2015	11	potato	20
2014-2015	11	potato	10
2014-2015	11	potato	10
2014-2015	11	potato	0
2014-2015	12	potato	10
2014-2015	12	potato	10
2014-2015	12	potato	10
2014-2015	12	potato	0
2014-2015	12	potato	0
2014-2015	12	potato	0
2014-2015	12	potato	10
2014-2015	12	potato	0
2014-2015	12	potato	30
2014-2015	12	potato	10
2014-2015	1	potato	0
2014-2015	1	potato	0
2014-2015	1	potato	0
2014-2015	1	potato	10
2014-2015	1	potato	10
2014-2015	1	potato	10
2014-2015	1	potato	10
2014-2015	1	potato	10
2014-2015	1	potato	0
2014-2015	1	potato	20
2014-2015	1	potato	10
2014-2015	1	potato	0
2014-2015	1	potato	40
2014-2015	1	potato	0
2014-2015	1	potato	0
2014-2015	1	potato	10
2014-2015	1	potato	0
2014-2015	1	potato	0
2014-2015	1	potato	5
2014-2015	2	potato	10
2014-2015	2	potato	20
2014-2015	2	potato	10
2014-2015	2	potato	0
2014-2015	2	potato	10
2014-2015	2	potato	20
2014-2015	2	potato	10
2013-2014	11	grain	3
2013-2014	11	grain	4
2013-2014	11	grain	98
2013-2014	11	grain	34
2013-2014	11	grain	5
2013-2014	11	grain	2
2013-2014	11	grain	45
2013-2014	11	grain	82
2013-2014	11	grain	104
2013-2014	11	grain	4
2013-2014	11	grain	3
2013-2014	11	grain	0
2013-2014	11	grain	86
2013-2014	12	grain	53
2013-2014	12	grain	73
2013-2014	12	grain	37
2013-2014	12	grain	76
2013-2014	12	grain	106
2013-2014	12	grain	43
2013-2014	12	grain	105
2013-2014	12	grain	1
2013-2014	12	grain	26
2013-2014	12	grain	12
2013-2014	12	grain	77
2013-2014	12	grain	45
2013-2014	12	grain	124
2013-2014	12	grain	108
2013-2014	12	grain	19
2013-2014	12	grain	40
2013-2014	12	grain	22
2013-2014	12	grain	86
2013-2014	12	grain	54
2013-2014	12	grain	3
2013-2014	12	grain	21
2013-2014	12	grain	44
2013-2014	12	grain	109
2013-2014	12	grain	62
2013-2014	12	grain	79
2013-2014	12	grain	95
2013-2014	1	grain	11
2013-2014	1	grain	6
2013-2014	1	grain	10
2013-2014	1	grain	82
2013-2014	1	grain	118
2013-2014	1	grain	118
2013-2014	1	grain	2
2013-2014	1	grain	187
2013-2014	1	grain	164
2013-2014	1	grain	186
2013-2014	1	grain	1
2013-2014	1	grain	12
2013-2014	1	grain	0
2013-2014	1	grain	116
2013-2014	1	grain	157
2013-2014	1	grain	130
2013-2014	1	grain	0
2013-2014	1	grain	3
2013-2014	1	grain	31
2013-2014	1	grain	17
2013-2014	1	grain	27
2013-2014	1	grain	94
2013-2014	2	grain	68
2013-2014	2	grain	125
2013-2014	2	grain	88
2013-2014	2	grain	48
2013-2014	2	grain	58
2013-2014	2	grain	129
2013-2014	2	grain	7
2013-2014	2	grain	10
2013-2014	2	grain	10
2013-2014	2	grain	9
2013-2014	2	grain	8
2013-2014	2	grain	3
2013-2014	2	grain	12
2013-2014	2	grain	112
2013-2014	2	grain	43
2013-2014	2	grain	21
2013-2014	2	grain	8
2013-2014	2	grain	90
2013-2014	2	grain	31
2013-2014	2	grain	44
2013-2014	2	grain	36
2013-2014	2	grain	40
2014-2015	11	grain	7
2014-2015	11	grain	13
2014-2015	11	grain	4
2014-2015	11	grain	86
2014-2015	11	grain	10
2014-2015	11	grain	72
2014-2015	11	grain	88
2014-2015	11	grain	90
2014-2015	11	grain	40
2014-2015	11	grain	3
2014-2015	11	grain	66
2014-2015	11	grain	3
2014-2015	11	grain	7
2014-2015	11	grain	20
2014-2015	11	grain	3
2014-2015	11	grain	62
2014-2015	11	grain	54
2014-2015	11	grain	37
2014-2015	12	grain	141
2014-2015	12	grain	99
2014-2015	12	grain	172
2014-2015	12	grain	136
2014-2015	12	grain	86
2014-2015	12	grain	79
2014-2015	12	grain	77
2014-2015	12	grain	124
2014-2015	12	grain	118
2014-2015	12	grain	136
2014-2015	12	grain	88
2014-2015	12	grain	106
2014-2015	12	grain	25
2014-2015	12	grain	8
2014-2015	12	grain	73
2014-2015	12	grain	19
2014-2015	12	grain	13
2014-2015	12	grain	5
2014-2015	12	grain	64
2014-2015	12	grain	79
2014-2015	1	grain	2
2014-2015	1	grain	3
2014-2015	1	grain	46
2014-2015	1	grain	43
2014-2015	1	grain	69
2014-2015	1	grain	5
2014-2015	1	grain	22
2014-2015	1	grain	2
2014-2015	1	grain	3
2014-2015	1	grain	1
2014-2015	1	grain	4
2014-2015	1	grain	66
2014-2015	1	grain	106
2014-2015	1	grain	112
2014-2015	1	grain	134
2014-2015	1	grain	52
2014-2015	1	grain	77
2014-2015	1	grain	45
2014-2015	1	grain	58
2014-2015	1	grain	178
2014-2015	1	grain	128
2014-2015	1	grain	44
2014-2015	2	grain	51
2014-2015	2	grain	116
2014-2015	2	grain	122
2014-2015	2	grain	93
2014-2015	2	grain	29
2014-2015	2	grain	35
2014-2015	2	grain	13
2014-2015	2	grain	5
2014-2015	2	grain	2
2014-2015	2	grain	107
2014-2015	2	grain	55
2014-2015	2	grain	160
2014-2015	2	grain	2
2014-2015	2	grain	16
2014-2015	2	grain	9
2014-2015	2	grain	0
2014-2015	2	grain	43
2014-2015	2	grain	48
2014-2015	2	grain	41
2014-2015	2	grain	5
2014-2015	2	grain	11
2014-2015	2	grain	19
2014-2015	2	grain	43
2014-2015	2	grain	21
2014-2015	2	grain	3
2014-2015	2	grain	51
